# Supplementary material for: Construction and Analysis of Gene Co-Expression Networks in Escherichia coli
Source: Cells. 2018 Mar 8;7(3):19. doi: 10.3390/cells7030019 (PMC5870351; doi:10.3390/cells7030019)
Supplement: Supplementary file 1 [file cells-07-00019-s001.xlsx]

## Sheet: Table S1
E. coli datasets used in our study
NCBI GSE accession	Experiment
GSE3665	Global transcriptional machinery engineering in E. coli in the presence and absence of ethanol
GSE4724	Transcriptome analysis of the arginine regulon in E.coli
GSE5552	E coli O157:H7 w/t LB-Glu 7 hr biofilm cells with various chemicals
GSE6195	EHEC hydroxyindole project
GSE6992	Expression data from a paraquat time course experiment in wild type and SoxR deficient strains
GSE7243	Expression data from overnight minimal medium culture
GSE7439	Escherichia coli strain 8624 and Escherichia coli strain VS94 with signaling molecules
GSE7656	E.coli GeneChip study of E.coli responses to osmotic and heat stresses
GSE8706	E. coli BW25113 yncC vs wt biofilm cells in LB 15h 37C and MG1655 yncC vs wt colony cells in LB plates 15h 37C
GSE9178	Genome-wide transcriptional response of an Avian Pathogenic Escherichia coli (APEC) Pst Mutant
GSE9388	VS94 SAPI AI-2 Temporal study
GSE9923	Indole cell signaling occurs primarily at low temperatures in Escherichia coli
GSE10116	E. coli K12 Bw25113/pCA24N-hha with 2 mM IPTG vs BW25113/pCA24N with 2 mM IPTG
GSE10159	Expression of Escherichia coli treated with cefsulodin and mecillinam, alone at the minimum inhibitory concentration
GSE10160	Expression of Escherichia coli treated with cefsulodin and mecillinam
GSE10345	Genome-wide analysis of transcriptional termination in E. coli
GSE11087	E. coli Isoleucine starvation and stringent response network
GSE11303	Transcriptional responses of Escherichia coli k12 TPEN
GSE11779	Protein Engineering of the Quorum-Sensing Regulator SdiA of Escherichia coli
GSE11927	RCV02 (cadA deficient) v wild-type enterohemorrhagic E. coli (EHEC)
GSE11932	Comparison between E. coli K-12 MG1655 and E. coli K-12 LVM100 delta 5 TA mutant on biofilm cell development
GSE12006	Oxygen downshift experiment with E.coli W3110
GSE12190	Ion transport and osmotic adjustment in E. coli in response to ionic and non-ionic osmotica
GSE12554	Transcript Analysis of E. coli ATCC 35218 suggest a Role of cranberry Juice in Inhibiting the growth of E. coli
GSE12701	Comparison between E. coli K-12 BW25113 wt and E. coli K-12 BW25113 yjgK deleted mutant on 8 h biofilm cell development
GSE12750	E. coli K-12 10 uM 5-fluorouracil biofilm vs. E. coli K-12 DMF biofilm
GSE12831	The role of qseE, qseF and qseG in the regulation of EHEC virulence
GSE13562	Effects of sidA and AHL on EHEC virulence
GSE13589	Gene expression of E. coli MG1655 pOX38Km at the outside and inside of biofilms
GSE13698	12 microarrays for cis-DCE mineralization and new stress genes
GSE13902	BW25113 fhlA/pCA24N-FhlA133 vs fhlA/pCA24N-FhlA in modified-complex 20 mM formate at 37ºC
GSE13982	Effect of CORM-2 on E. coli transcriptome
GSE14064	E. coli BW25113 ompA mutant vs wild type biofilm and E. coli BW25113 ompA/pCA24N_ompA vs ompA/pCA24N suspension cells
GSE14203	E. coli MqsR and MqsA whole DNA microarray and nickel DNA enrichment microarray
GSE14238	Expression data from E. coli O157:H7 growth in the absence or presence of HEp-2 epithelial cells
GSE14472	CP4-57-deficient vs. wild-type
GSE14796	Comparison of gene expression profiles of E. coli W3110 normal colonies vs. L-form colonies
GSE15050	Bacterial Adrenergic signaling
GSE15319	Conditioning of uropathogenic Escherichia coli to nitrosative stress
GSE15404	Expression data from E. coli cells overexpressing GraL for short periods of time
GSE15405	Expression data from E. coli cells overexpressing GraL for long periods of time
GSE15406	Expression data from E. coli cells overexpressing GraL for short and long periods of time
GSE15500	Analysis of differences in gene expression due to small adaptive mutations in RNA polymerase B' subunit (rpoC)
GSE15533	Expression data from E. coli O157
GSE17420	Global effect of RpoS on gene expression in pathogenic Escherichia coli O157:H7 strain EDL933
GSE17465	Transcriptional profile of Escherichia coli K12 strain JM109 harboring pMG1 and pMG1-IrrE under 1M NaCl shock
GSE17519	Transcription analysis of E. coli O157:H7 when exposed to sodium benzoate
GSE17526	Transcriptional responses of Escherichia coli rpoS- BW25113 vs. wild-type BW25113 under 15% ethanol shock in log phase
GSE17584	Transcriptional effects of CRP* expression in Escherichia coli
GSE17853	E. coli K-12 hha hns: pCA24N-hnsK57N vs pCA24N-hns biofilm
GSE18118	QseA regulation of virulence factors in EHEC
GSE18474	A novel metabolic monitoring system identified nutrition-mediated microbial interactions
GSE18623	E. coli gene expression following CHIR-090 treatment
GSE18852	E. coli BW25113 K-12 hfq vs. wild-type persister
GSE18935	Effects on small RNA MgrR in Escherichia coli
GSE18972	E. coli BW25113 frdC vs. E. coli BW25113 HW2
GSE19655	Reprogramming of anaerobic metabolism by the FnrS Small RNA
GSE19842	The effect of IAN on E. coli O157:H7 EHEC biofilm formation
GSE19953	Mechanisms of Biofilm Formation in Two Escherichia coli O157:H7 Lineages
GSE20095	Antagonistic regulation of motility and other cellular functions by RpoN and RpoS in Escherichia coli
GSE20374	Metabolic and transcriptional response to cofactor perturbations in Escherichia coli
GSE20380	Global transcriptional response of E. coli to the presence and absence of bile salts
GSE20413	EHEC and K-12 E. coli QseD mutant analysis
GSE21551	Expression Data from Escherichia coli grown to mid-log growth phase.
GSE21604	Biofilm dispersal of Hha13D6 vs. Hha and biofilm formation of Hha24E9 vs. Hha in E.coli K-12 BW25113 hha mutant in LBglu at 37oC
GSE21652	Expression data for transcriptional engineering mutants capable of L-tyrosine overproduction
GSE21820	Genome-wide characterization of PhoB binding profile in Escherichia coli (gene expression data)
GSE21839	Transcriptome analysis of wild type E. coli (K-12 MG1655) comparing to mutant E. coli strain (ECOM4) under aerobic and anaerobic conditions
GSE21857	Genome-wide characterization of PhoB binding profile in Escherichia coli
GSE21893	Expression data from an Avian pathogenic Escherichia coli strain
GSE22057	E. coli K-12 mutant yjgI biofilm vs. wild type biofilm
GSE22207	Identification of promoter sequence elements involved in specific recognition by the σS subunit of bacterial RNA polymerase.
GSE22285	Changes in EHEC virulence on exposure to epithelial cell secreted factors
GSE23359	BW25113 with DNA and azlocillin
GSE23417	Differential expression of E.coli mar/rob/soxS triple mutant and wild type in a mouse model of pyelonephritis
GSE24524	Identification of genes induced on nitrate, role of OxyR
GSE24875	The base pairing RNA Spot 42 participates in a multi-output feedforward loop to help enact catabolite repression in Escherichia coli
GSE25318	Expanding the Pathways of Manganese Homeostasis: Role of a Small Manganese Chaperone Protein, MntS
GSE25745	Cranberry derived proanthocyanidins induce a state of iron-limitation in uropathogenic Escherichia coli CFT073 as revealed by microarray analysis
GSE26588	Transcriptome analysis of E. coli MG1655
GSE26591	Genome-scale reconstruction of the PurR regulon reveals its role in the adenine stimulon of Escherichia coli K-12 MG1655
GSE26931	Mixed Culture Gene Expression of E. coli and Pseudomonas aeruginosa
GSE26932	Mixed Culture Gene Expression of E. coli and Pseudomonas aeruginosa grown on defined media with N-acetyl glucosamine
GSE28144	The Apple Flavonoid Phloretin Inhibits Escherichia coli O157:H7 Biofilm Formation and Ameliorates Colon Inflammation in Rat
GSE28193	Honeys Inhibit Virulence and Biofilm Formation in Enterohaemorrhagic Escherichia coli O157:H7, but Do not Harm Commensal Escherichia coli K-12 Biofilm
GSE28399	Transcriptional responses of uropathogenic E. coli to stresses caused by sodium chloride or urea.
GSE28412	Analyzing the metabolic stress response of recombinant Escherichia coli cultures expressing human interferon beta in high cell density fed batch cultures using time course transcriptomic data
GSE28795	Expression data from E. coli cells overexpressing either GreA or GreB in ppGpp0 cells in the dksA+ or dksA- background
GSE29076	Nitric oxide effect in Escherichia coli O157:H7
GSE29266	Relative expression profiling of ycdC knockout strain secreting HlyA protein
GSE29439	Global transcriptome response of recombinant protein xylanase producing E. coli in high cell density fed batch culture
GSE29440	Design of an improved host platform for the over expression of recombinant proteins in Escherichia coli
GSE29486	Uncoupling growth and product formation kinetics to design improved strains for recombinant protein production in escherichia coli
GSE29803	Escherichia coli BW25113 cobB/pCA24N-cobB vs. cobB/pCA24N under stress conditions
GSE30424	Indole-3-Acetaldehyde Inhibits Escherichia coli O157:H7 Biofilm Formation by Reducing Curli Formation
GSE30441	Expression data from ethanol-tolerant E. coli strain and wild type under ethanol stress
GSE30639	Evolution of gene expression during long term coexistence in a bacterial evolution experiment
GSE30679	Escherichia coli glutathionylspermidine: Phylogeny and regulation of gene expression
GSE30692	E.coli MG1655Δ6/pCA24N-dinJ treated with erythromycin vs. MG1655Δ6/pCA24N
GSE30838	Transcriptional profile of Escherichia coli K12 strain JM109 under 200 mM glyphosate shock
GSE30893	Hfq virulence regulation in enterohemorhagic Escherichia coli O157:H7 strain 86-24
GSE31029	PhoP regulon in pathogenic Escherichia coli
GSE31054	Persistence of BW25113 mqsR producing MqsR 2-1 vs. producing wild-type MqsR with ampicillin
GSE31140	E.coli response to Antimicrobial Arylamides
GSE33895	Enterohemorrhagic Escherichia coli (EHEC)8624 double deletions of qseC and qseE grown in DMEM
GSE34023	Overexpression of BglJ and LeuO in Escherichia coli K12
GSE34028	BW25113 H202 and delta rpoS persister cells vs. stationary phase BW25113 wild-type
GSE34046	Ethanolamine gene regulation in EHEC
GSE34275	Escherichia coli K-12 grown in the presence of glycerol exhibits upregulation in genes for acid stress chaperones and concomitant downregulation in genes involved in generation of acidic metabolites
GSE34631	Transcriptome analysis of E. coli in M9 minimal media supplemented with propylene glycol or glycerol
GSE34991	Transcriptional profile of EHEC 86-24 fusK (HK) and fusR (RR) mutants
GSE35100	Expression data from furfural-tolerant E. coli strain and wild type under furfural stress
GSE35371	Genome-wide transcription analysis of Escherichia coli in response to extremely low-frequency magnetic fields
GSE35797	Uropathogenic E. coli UTI89 cells in the presence of dimethyl sulfoxide or ethanol
GSE36779	BW25113 GhoS for RNase activity
GSE37026	Expression data from control and colicin M treated E. coli MG1655 culture
GSE37095	Expression data from Escherichia coli O157:H7, strain EDL933, cultivated in caecal content of rats associated with the human intestinal microbiota
GSE37780	Transcriptional profile of Escherichia coli K12 strain DH10B harboring A1501 nitrogen fixation island (NFI) under nitrogen fixation conditions
GSE39343	Gene expression of triclosan susceptible and tolerant E. coli O157:H19 in response to triclosan exposure
GSE39607	Expression data from QdNOs treated Escherichia coli
GSE40648	Effect of simulated microgravity on E. coli K12 MG1655 growth and gene expression
GSE40693	Transcriptional response of Escherichia coli O157:H7 to cinnamaldehyde
GSE42702	Stress response in the yajL (DJ-1 homolog) mutant of Escherichia coli
GSE43325	Atypical Enteropathogenic Escherichia coli Virulence Regulation by QseC Quorum Sensing Adrenergic Sensor
GSE43659	Enterohemorrhagic Escherichia coli (EHEC) 8624 double deletions of kdpe and cra grown in DMEM
GSE44211	Gene expression in Escherichia coli treated with human PGRP, gentamicin, and CCCP
GSE44273	Effects of (E)-4-bromo-5-(bromomethylene)-3-methylfuran-2(5H)-one (BF8) on E. coli RP437 persister cells (two biological replicates)
GSE46625	Transcriptional profile of Escherichia coli K12 strain JM109 harboring pUCA1501
GSE47418	Expression data of Enterohemorrhagic E. coli O157:H7 (EHEC) strain 86-24 when cultured with Bacteroides thetaiotaomicron VPI-5482
GSE47427	Expression profile for overproduction of DosP
GSE48015	Expression data from Avian Pathogenic Escherichia coli
GSE48776	Gene expression from Escherichia coli.
GSE48832	Expression from Escherichia coli
GSE49367	Ginkgolic acids and Ginko biloba extract inhibit Escherichia coli O157:H7 biofilm formation
GSE49918	Polyamines are critical for the induction of the glutamate decarboxylase-dependent acid resistance system in Escherichia coli
GSE50529	PhoB Activates Escherichia coli O157:H7 Virulence Factors in Response to Inorganic Phosphate Limitation
GSE50828	DNA microarray analysis of E.coli K12 MG1655 exposed to prolonged stationary phase
GSE51581	Gene expression profile of E. coli MG1655 cells grown at different growth rates in mixed substrates culture
GSE53140	Transcriptomic analysis of carboxylic acid challenge in Escherichia coli: beyond membrane damage
GSE54271	Expression profile for overproduction of ArT
GSE55365	Fermentative and nitrate respiratory transcriptome analysis of E. coli K12 MG1655
GSE55367	Determining the control circuitry of redox metabolism at the genome-scale
GSE55662	Plasticity of transcriptional regulation under antibiotic stress
GSE56133	Antibiotics induce redox-related physiological alterations as part of their lethality
GSE56251	Expression data from Escherichia coli after treatment with nalidixic acid (NA)
GSE56447	Time series expression data during phosphate limitation for E. coli K12 JP6015/pMU91
GSE58509	BolA is a transcriptional switch that turns off motility and turns on biofilm development
GSE59441	Expression profile for BW25113 ΔmqsRA with deoxycholate stress
GSE61092	Expression data from the commensal bacteria Escherchia coli strain HB101 interacting with Caenorhabditis elegans and/or Giardia duodenalis
GSE61604	Effect of Drosophila immune proteins on gene expression in E. coli
GSE62094	Lysine acetylation effect in gene expression in Escherichia coli
GSE62918	Expression data from Escherichia coli strains with increased or decreased levels of Obg (ObgE, CgtA, YhbZ)
GSE63336	Enterohemorrhagic Escherichia coli (EHEC) deletions of glmY and glmZ
GSE65385	Comparison of Escherichia coli K-12 tynA- with wild type Escherichia coli K-12
GSE67119	Polyamines induce the glutamate decarboxylase acid response system by increasing the level of the σ38 subunit (RpoS) of Escherichia coli RNA polymerase via gadE regulon
GSE68064	Effects of Escherichia coli global gene expression due to microfluidic processing
GSE68105	Escherichia coli global gene expression due ciprofloxacin challenge in laboratory medium and human serum
GSE68106	Escherichia coli global gene expression due ciprofloxacin challenge in human whole blood
GSE68107	Escherichia coli global gene expression due to ciprofloxacin challenge in bloodstream infection like conditions
GSE72525	Expression of genes at the 45 min time point relative to that at 0 min time after release from initiation-arrest in either presence or absence of TorR
GSE72738	Expression data of uropathogenic E. coli CFT073 after exposure to subinhibitory concentrations of five biocides.
GSE73416	Escherichia coli MG1655 gene expression in glucose minimum media
GSE77872	Global gene expression in ocular isolates of Escherichia coli with potential to form biofilm
GSE80002	Transcriptome analysis of Escherichia coli during dGTP Starvation
GSE81974	DNA microarray-mediated transcriptional profiling of avian pathogenic Escherichia coli O2 strain E058 during its infection of chicken

## Sheet: Table S2
1391 E. coli samples' characterization
GSM accession	sample characteristics 2	sample characteristics 2
GSM85143	DH5-alpha (Invitrogen)	wild type, 0 g/L EtOH, replicate 1
GSM85144	DH5-alpha (Invitrogen)	wild type, 0 g/L EtOH, replicate 2
GSM85145	DH5-alpha (Invitrogen)	wild type, 0 g/L EtOH, replicate 3
GSM85146	DH5-alpha (Invitrogen)	round 1, 0 g/L EtOH, replicate 1
GSM85147	DH5-alpha (Invitrogen)	round 1, 0 g/L EtOH, replicate 2
GSM85148	DH5-alpha (Invitrogen)	round 1, 0 g/L EtOH, replicate 3
GSM85149	DH5-alpha (Invitrogen)	round 2, 0 g/L EtOH, replicate 1
GSM85150	DH5-alpha (Invitrogen)	round 2, 0 g/L EtOH, replicate 2
GSM85151	DH5-alpha (Invitrogen)	round 2, 0 g/L EtOH, replicate 3
GSM85152	DH5-alpha (Invitrogen)	round 3, 0 g/L EtOH, replicate 1
GSM85153	DH5-alpha (Invitrogen)	round 3, 0 g/L EtOH, replicate 2
GSM85154	DH5-alpha (Invitrogen)	round 3, 20 g/L EtOH, replicate 1
GSM85155	DH5-alpha (Invitrogen)	round 3, 20 g/L EtOH, replicate 2
GSM85156	DH5-alpha (Invitrogen)	round 3, 20 g/L EtOH, replicate 3
GSM85157	DH5-alpha (Invitrogen)	round 3, 40 g/L EtOH, replicate 1
GSM85158	DH5-alpha (Invitrogen)	round 3, 40 g/L EtOH, replicate 2
GSM85159	DH5-alpha (Invitrogen)	round 3, 40 g/L EtOH, replicate 3
GSM85160	DH5-alpha (Invitrogen)	wild type, 20 g/L EtOH, replicate 1
GSM85161	DH5-alpha (Invitrogen)	wild type, 20 g/L EtOH, replicate 2
GSM85162	DH5-alpha (Invitrogen)	wild type, 20 g/L EtOH, replicate 3
GSM106504	Strain P4X, grown on minimal medium, reference sample	P4X Wild Type (1753) Reference
GSM106751	E.Coli, strain P4X, grown on minimal medium, reference sample	P4X Wild Type (1765) Reference
GSM106752	E.Coli, strain P4X, grown on minimal medium, reference sample	P4X Wild Type (1989) Reference
GSM106753	E.Coli, strain P4X, grown in presence of arginine(100 ug/ml)	P4X Wild Type (1754) in Arginine
GSM106755	E.Coli, strain P4X, grown in presence of arginine(100 ug/ml)	P4X Wild Type (1766) in Arginine
GSM106756	E.Coli, strain P4X, grown in presence of arginine(100 ug/ml)	P4X Wild Type (1990) in Arginine
GSM106757	E.Coli, strain P4XB2 mutant, grown in presence of arginine(100 ug/ml)	P4XB2 Mutant (1992) in Arginine
GSM106758	E.Coli, strain P4XB2 mutant, grown in presence of arginine(100 ug/ml)	P4XB2 Mutant (1993) in Arginine
GSM106759	E.Coli, strain P4XB2 mutant, grown in presence of arginine(100 ug/ml)	P4XB2 Mutant (1994) in Arginine
GSM129073	EHEC biofilm 7 hrs Lb-glu	E coli O157:H7 w/t LB-Glu with 0.1%DMF 7 hr biofilm cells
GSM129074	EHEC biofilm 7 hrs Lb-glu-epi	E coli O157:H7 w/t LB-Glu with 50uM Epinephrine 7 hr biofilm cells
GSM129075	EHEC biofilm 7 hrs Lb-glu-NE	E coli O157:H7 w/t LB-Glu with 50uM norepinephrine 7 hr biofilm cells
GSM129076	EHEC biofilm 7 hrs Lb-glu-IND	E coli O157:H7 w/t LB-Glu with 500uM Indole 7 hr biofilm cells
GSM143158	7 h suspension cells	EHEC LB 7 h suspension cells
GSM143159	7 h biofilm cells	EHEC LB 7 h biofilm cells
GSM143160	7 h 7HI biofilm cells	EHEC LB 7 h 7HI biofilm cells
GSM143161	7 h isatin biofilm cells	EHEC LB 7 h isatin biofilm cells
GSM161201	Escherichia coli MG1655 with a precise deletion in soxR before paraquat treatment	M1655 with deletion in soxR at t0, rep1
GSM161202	Escherichia coli MG1655 with a precise deletion in soxR and 2 minutes paraquat treatment	M1655 with deletion in soxR at t2, rep1
GSM161203	Escherichia coli MG1655 with a precise deletion in soxR and 4 minutes paraquat treatment	M1655 with deletion in soxR at t4, rep1
GSM161204	Escherichia coli MG1655 with a precise deletion in soxR and 6 minutes paraquat treatment	M1655 with deletion in soxR at t6, rep1
GSM161205	Escherichia coli MG1655 with a precise deletion in soxR and 8 minutes paraquat treatment	M1655 with deletion in soxR at t8, rep1
GSM161206	Escherichia coli MG1655 with a precise deletion in soxR and 10 minutes paraquat treatment	M1655 with deletion in soxR at t10, rep1
GSM161207	Escherichia coli MG1655 before paraquat treatment	M1655 wild type at t0, rep1
GSM161208	Escherichia coli MG1655 2 minutes paraquat treatment	M1655 wild type at t2, rep1
GSM161209	Escherichia coli MG1655 4 minutes paraquat treatment	M1655 wild type at t4, rep1
GSM161210	Escherichia coli MG1655 6 minutes paraquat treatment	M1655 wild type at t6, rep1
GSM161211	Escherichia coli MG1655 8 minutes paraquat treatment	M1655 wild type at t8, rep1
GSM161212	Escherichia coli MG1655 10 minutes paraquat treatment	M1655 wild type at t10, rep1
GSM161213	Escherichia coli MG1655 before paraquat treatment	M1655 wild type at t0, rep2
GSM161214	Escherichia coli MG1655 2 minutes paraquat treatment	M1655 wild type at t2, rep2
GSM161215	Escherichia coli MG1655 4 minutes paraquat treatment	M1655 wild type at t4, rep2
GSM161216	Escherichia coli MG1655 6 minutes paraquat treatment	M1655 wild type at t6, rep2
GSM161217	Escherichia coli MG1655 8 minutes paraquat treatment	M1655 wild type at t8, rep2
GSM161218	Escherichia coli MG1655 10 minutes paraquat treatment	M1655 wild type at t10, rep2
GSM174666	K12 WT 3110	WT3110_1
GSM174667	K12 WT 3110	WT3110_2
GSM174668	K12 WT 3110	WT3110_3
GSM174669	phoU gene mutant	phoU_1
GSM174670	phoU gene mutant	phoU_2
GSM174671	phoU gene mutant	phoU_3
GSM180102	Escherichia coli strain VS94	Escherichia coli strain VS94; DMEM OD600=1.0
GSM180104	Escherichia coli strain 8624	Escherichia coli strain 8624; DMEM OD600=1.0
GSM180106	Escherichia coli strain VS94	Escherichia coli strain VS94 + dpd; DMEM OD600=1.0
GSM180110	Escherichia coli strain VS94	Escherichia coli strain VS94 + epinephrine; DMEM OD600=1.0
GSM180112	Escherichia coli strain VS94	Escherichia coli strain VS94 + AI3; DMEM OD600=1.0
GSM231797	chi7122 exp. 1	Wild-type strain chi7122 exp. 1
GSM231800	Wild-type strain chi7122 experiment 2	Wild-type strain chi7122 exp. 2
GSM231802	Wild-type strain chi7122 experiment 3	Wild-type strain chi7122 exp. 3
GSM231804	Wild-type strain chi7122 experiment 4	Wild-type strain chi7122 exp. 4
GSM231807	Pst mutant (K3) strain experiment 1	Pst mutant K3 exp. 1
GSM231809	Pst mutant (K3) strain experiment 2	Pst mutant K3 exp. 2
GSM231811	Pst mutant (K3) strain experiment 3	Pst mutant K3 exp. 3
GSM231813	Pst mutant (K3) strain experiment 4	Pst mutant K3 exp. 4
GSM239042	VS94 SAPI 3.5h control	VS94 SAPI 3.5h control
GSM239043	VS94 SAPI 3.5h 100uM AI-2	VS94 SAPI 3.5h 100uM AI-2
GSM239044	VS94 SAPI 4h control	VS94 SAPI 4h control
GSM239045	VS94 SAPI 4h 100uM AI-2	VS94 SAPI 4h 100uM AI-2
GSM239046	VS94 SAPI 4.5h control	VS94 SAPI 4.5h control
GSM239047	VS94 SAPI 4.5h 100uM AI-2	VS94 SAPI 4.5h 100uM AI-2
GSM239048	VS94 SAPI 5.5h control	VS94 SAPI 5.5h control
GSM239049	VS94 SAPI 5.5h 100uM AI-2	VS94 SAPI 5.5h 100uM AI-2
GSM247664	Channel 1	BW25113 w/t LB 30C OD 4.0 free-living cells
GSM247665	Channel 1	BW25113 sdiA LB 30C OD 4.0 free-living cells
GSM247666	Channel 1	BW25113 luxS LB 30C free-living cells no AI2 for 3h
GSM247667	Channel 1	BW25113 luxS LB 30C free-living cells 100 uM AI2 3h
GSM247668	Channel 1	BW25113 luxS LB 37C free-living cells 100 uM AI2 3h
GSM247669	Channel 1	BW25113 luxS LB 37C free-living cells no AI2 3h
GSM247861	Channel 1	BW25113 tnaA Biofilm DMF 7h LB 37C
GSM247867	Channel 1	BW25113 tnaA Biofilm 100 uM indole 7h LB 37C
GSM264625	Channel 1	BW25113 sdiA mutant LB with 1 mM indole 7-h 30C biofilm cell
GSM264626	Channel 1	BW25113 sdiA mutant LB with DMF 7-h 30C biofilm cell
GSM255759	Channel 1	BW25113/pCA24N LB 2 mM IPTG suspension cells
GSM255761	Channel 1	BW25113/pCA24N-hha LB 2 mM IPTG suspension cells
GSM256911	Untreated E. coli 5 minute	Ecoli_untreated_5min_rep3
GSM256912	Untreated E. coli 10 minute	Ecoli_untreated_10min_rep1
GSM256913	Untreated E. coli 10 minute	Ecoli_untreated_10min_rep2
GSM256914	Untreated E. coli 10 minute	Ecoli_untreated_10min_rep3
GSM256915	Untreated E. coli 60 minute	Ecoli_untreated_60min_rep1
GSM256916	Untreated E. coli 60 minute	Ecoli_untreated_60min_rep2
GSM256917	Untreated E. coli 60 minute	Ecoli_untreated_60min_rep3
GSM256918	Untreated E. coli 40 minute	Ecoli_untreated_40min_rep4_2
GSM256919	Treated E. coli 60 ug/ml cefsulodin 5 minute	Ecoli_treated_cefsulodin60_5min_rep1
GSM256920	Treated E. coli 60 ug/ml cefsulodin 5 minute	Ecoli_treated_cefsulodin60_5min_rep2
GSM256921	Treated E. coli 60 ug/ml cefsulodin 5 minute	Ecoli_treated_cefsulodin60_20min_rep1
GSM256922	Treated E. coli 60 ug/ml cefsulodin 10 minute	Ecoli_treated_cefsulodin60_10min_rep1
GSM256923	Treated E. coli 60 ug/ml cefsulodin 10 minute	Ecoli_treated_cefsulodin60_10min_rep2
GSM256924	Treated E. coli 60 ug/ml cefsulodin 10 minute	Ecoli_treated_cefsulodin60_10min_rep3
GSM256925	Treated E. coli 0.3 ug/ml mecillinam 60 minute	Ecoli_treated_mecillinam0.3_60min_rep1
GSM256926	Treated E. coli 0.3 ug/ml mecillinam 60 minute	Ecoli_treated_mecillinam0.3_60min_rep2
GSM256927	Treated E. coli 0.3 ug/ml mecillinam 60 minute	Ecoli_treated_mecillinam0.3_60min_rep3
GSM256928	Treated E. coli 10 ug/ml cefsulodin and 0.03 ug/ml mecillinam 40 minute	Ecoli_treated_cefmec_40min_rep4_2
GSM261482	K12 strain MG1655, control sample, exponential phase	Coli-MG1655_no-drug_rep1
GSM261483	K12 strain MG1655, control sample, exponential phase	Coli-MG1655_no-drug_rep2
GSM261484	K12 strain MG1655, 10 mcg/ml bicyclomycin 20 min, exponential phase	Coli-MG1655_bcm-10mcg/ml_rep1
GSM261485	K12 strain MG1655, 10 mcg/ml bicyclomycin 20 min, exponential phase	Coli-MG1655_bcm-10mcg/ml_rep2
GSM261486	K12 strain MG1655, 25 mcg/ml bicyclomycin 20 min, exponential phase	Coli-MG1655_bcm-25mcg/ml_rep1
GSM261487	K12 strain MG1655, 25 mcg/ml bicyclomycin 20 min, exponential phase	Coli-MG1655_bcm-25mcg/ml_rep2
GSM261488	K12 strain MG1655, 100 mcg/ml bicyclomycin 20 min, exponential phase	Coli-MG1655_bcm-100mcg/ml_rep1
GSM261489	K12 strain MG1655, 100 mcg/ml bicyclomycin 20 min, exponential phase	Coli-MG1655_bcm-100mcg/ml_rep2
GSM261490	O157:H7 strain EDL933, control sample, exponential phase	Coli-O157H7_no-drug_rep1
GSM261491	O157:H7 strain EDL933, control sample, exponential phase	Coli-O157H7_no-drug_rep2
GSM261492	O157:H7 strain EDL933, 100 mcg/ml bicyclomycin 20 min, exponential phase	Coli-O157H7_bcm-100mcg/ml_rep1
GSM261493	O157:H7 strain EDL933, 100 mcg/ml bicyclomycin 20 min, exponential phase	Coli-O157H7_bcm-100mcg/ml_rep2
GSM261494	Reduced genome strain MDS42, control sample, exponential phase	Coli-MDS42_no-drug_rep1
GSM261495	Reduced genome strain MDS42, control sample, exponential phase	Coli-MDS42_no-drug_rep2
GSM261496	Reduced genome strain MDS42, 100 mcg/ml bicyclomycin 20 min, exponential phase	Coli-MDS42_bcm-100mcg/ml_rep1
GSM261497	Reduced genome strain MDS42, 100 mcg/ml bicyclomycin 20 min, exponential phase	Coli-MDS42_bcm-100mcg/ml_rep2
GSM261498	Reduced genome strain MDS42, deletion of nusA gene, OD600=0.3	Coli-MDS42_del-nusA_rep1
GSM261499	Reduced genome strain MDS42, deletion of nusA gene, OD600=0.3	Coli-MDS42_del-nusA_rep2
GSM261500	Reduced genome strain MDS42, deletion of nusG gene, OD600=0.3, overnight culture	Coli-MDS42_del-nusG_rep1
GSM261501	Reduced genome strain MDS42, deletion of nusG gene, OD600=0.3, overnight culture	Coli-MDS42_del-nusG_rep2
GSM585505	E. coli wild-type, replete isoleucine, control	WT_+ile_rep1
GSM585506	E. coli wild-type, replete isoleucine, control	WT_+ile_rep2
GSM585507	E. coli wild-type, isoleucine starved	wt_-ile_tp1
GSM585508	E. coli wild-type, isoleucine starved	wt_-ile_tp2
GSM585509	E. coli wild-type, isoleucine starved	wt_-ile_tp3
GSM585510	E. coli wild-type, isoleucine starved	wt_-ile_tp4
GSM585511	E. coli wild-type, isoleucine starved	wt_-ile_tp5
GSM585512	E. coli wild-type, isoleucine starved	wt_-ile_tp6
GSM585513	E. coli wild-type, isoleucine starved	wt_-ile_tp7
GSM585514	E. coli wild-type, isoleucine starved	wt_-ile_tp8
GSM585515	E. coli wild-type, isoleucine starved	wt_-ile_tp9
GSM585516	E. coli wild-type, isoleucine starved	wt_-ile_tp10
GSM585517	E. coli wild-type, isoleucine starved	wt_-ile_tp11
GSM585518	E. coli wild-type, isoleucine starved	wt_-ile_tp12
GSM298124	wild type SdiA	BW25113 sdiA-WTSdiA 12h biofilm cells at 30oC
GSM298125	mutant SdiA1E11	BW25113 sdiA-SdiA1E11 12h biofilm cells at 30oC
GSM341044	Channel 1	BW25113 sdiA-empty vector 12h biofilm cells at 30oC
GSM301404	Escherichia coli RCV02 mutant, groth in DMEM to OD600=0.5	TORRES_EHEC_RCV02_OD0.5_DMEM
GSM301405	Escherichia coli 8624 (wt), growth in DMEM to OD600=0.5	TORRES_EHEC_WT_8624_OD0.5_DMEM
GSM301485	biofilm cells of E. coli K-12 MG1655 grown at 37oC for 15 h	Biofilm cells of E. coli K-12 MG1655
GSM301486	biofilm cells of E. coli K-12 LVM100 delta 5 TA mutant grown at 37oC for 15 h	Biofilm cells of E. coli K-12 LVM100 delta 5 TA mutant
GSM303526	E.coli W3110, fermentation sample taken 15 minutes before oxygen downshift	E.coli W3110, 15 minutes before oxygen downshift, sample S1
GSM303527	E.coli W3110, fermentation sample taken 15 minutes after oxygen downshift	E.coli W3110, 15 minutes after oxygen downshift, sample S2
GSM303528	E.coli W3110, fermentation sample taken 45 minutes after oxygen downshift	E.coli W3110, 45 minutes after oxygen downshift, sample S3
GSM303529	E.coli W3110, fermentation sample taken 75 minutes after oxygen downshift	E.coli W3110, 75 minutes after oxygen downshift, sample S4
GSM306856	E. coli Frag1 (control sample 1)	E. coli control, biological replicate 1
GSM306857	E. coli Frag1 (biological replicate 2)	E. coli control (biological replicate 2)
GSM306858	E.coli Frag1, sucrose hyperosmotic treatment (biological replicate 1)	E. coli sucrose hyperosmotic treatment (biological replicate 1)
GSM306859	E. coli Frag1, sucrose hyperosmotic treatment (biological replicate 2)	E. coli sucrose hyperosmotic treatment (biological replicate 2)
GSM306860	E. coli Frag1, hyperosmotic NaCl treatment (biological replicate 1)	E. coli NaCl hyperosmotic treatment (biological replicate 1)
GSM306861	E. coli Frag1, NaCl hyperosmotic treatment (biological replicate 2)	E. coli NaCl hyperosmotic treatment (biological replicate 2)
GSM315524	ATCC 35218, E. coli grown in LB, rep1	E. coli grown in LB, rep1
GSM315525	ATCC 35218, E. coli grown in LB, rep2	E. coli grown in LB, rep2
GSM315526	ATCC 35218, E. coli grown in LB, rep3	E. coli grown in LB, rep3
GSM315527	ATCC 35218, Generation 50 E. coli grown in LB broth + 10% cranberry juice, rep 1	Generation 50 E. coli grown in LB broth + 10% cranberry juice, rep 1
GSM315528	ATCC 35218, Generation 50 E. coli grown in LB broth + 10% cranberry juice, rep 2	Generation 50 E. coli grown in LB broth + 10% cranberry juice, rep 2
GSM315529	ATCC 35218, Generation 50 E. coli grown in LB broth + 10% cranberry juice, rep 3	Generation 50 E. coli grown in LB broth + 10% cranberry juice, rep 3
GSM315530	ATCC 35218, Generation 160 E. coli grown in LB broth + 10% cranberry juice, rep 1	Generation 160 E. coli grown in LB broth + 10% cranberry juice, rep 1
GSM315531	ATCC 35218, Generation 160 E. coli grown in LB broth + 10% cranberry juice, rep 2	Generation 160 E. coli grown in LB broth + 10% cranberry juice, rep 2
GSM315532	ATCC 35218, Generation 160 E. coli grown in LB broth + 10% cranberry juice, rep 3	Generation 160 E. coli grown in LB broth + 10% cranberry juice, rep 3
GSM315533	ATCC 35218, Generation 210 E. coli grown in LB broth + 10% cranberry juice, rep 1	Generation 210 E. coli grown in LB broth + 10% cranberry juice, rep 1
GSM315534	ATCC 35218, Generation 210 E. coli grown in LB broth + 10% cranberry juice, rep 2	Generation 210 E. coli grown in LB broth + 10% cranberry juice, rep 2
GSM315535	ATCC 35218, Generation 210 E. coli grown in LB broth + 10% cranberry juice, rep 3	Generation 210 E. coli grown in LB broth + 10% cranberry juice, rep 3
GSM315536	ATCC 35218, Generation 230 E. coli grown in LB broth + 10% cranberry juice, rep 1	Generation 230 E. coli grown in LB broth + 10% cranberry juice, rep 1
GSM318714	BW25113 wild-type	BW25113_wild_type_8_h_biofilm_LB
GSM318715	BW25113 yjgK deleted mutant	BW25113_yjgK_deleted_mutant_8_h_biofilm_LB
GSM319951	E. coli K-12 biofilm cells, LB DMF	ATCC 25404 WT LB DMF 7 h 37C biofilm cell
GSM319952	E. coli K-12 biofilm cells, LB 5FU	ATCC 25404 WT LB 5FU 7 h 37C biofilm cell
GSM356794	E. coli K-12 biofilm cells, LB DMF	ATCC 25404 WT LB DMF 7 h 37C biofilm cell (Rep2)
GSM356795	E. coli K-12 biofilm cells, LB 5FU	ATCC 25404 WT LB 5FU 7 h 37C biofilm cell (Rep2)
GSM322121	Escherichia coli 8624 qseE deletion mutant	E. coli 8624 qseE deletion mutant
GSM322122	Escherichia coli 8624 qseF deletion mutant	E. coli 8624 qseF deletion mutant
GSM322123	Escherichia coli 8624 qseG deletion mutant grown in DMEM	E. coli 8624 qseG deletion mutant
GSM322124	E. coli 8624	E. coli 8624 WT
GSM341492	E. coli 8624 + AHL	E. coli 8624 WT + AHL
GSM341493	E. coli 8624 sdiA deletion mutant	E. coli 8624 sidA deletion mutant
GSM341494	E. coli 8624 sdiA deletion mutant + AHL	E. coli 8624 sidA deletion mutant + AHL
GSM341911	Inside of biofilm in MOPS media with 0.2% glucose	Biofilm_Inside_rep1
GSM341912	Inside of biofilm in MOPS media with 0.2% glucose	Biofilm_Inside_rep2
GSM341913	Inside of biofilm in MOPS media with 0.2% glucose	Biofilm_Inside_rep3
GSM341914	Outside of biofilm in MOPS media with 0.2% glucose	Biofilm_Outside_rep1
GSM341915	Outside of biofilm in MOPS media with 0.2% glucose	Biofilm_Outside_rep2
GSM341916	Outside of biofilm in MOPS media with 0.2% glucose	Biofilm_Outside_rep3
GSM341917	Planktonic exponential phase in MOPS media with 0.2% glucose	Planktonic_Exponential_rep1
GSM341918	Planktonic exponential phase in MOPS media with 0.2% glucose	Planktonic_Exponential_rep2
GSM341919	Planktonic exponential phase in MOPS media with 0.2% glucose	Planktonic_Exponential_rep3
GSM341920	Planktonic stationary phase in MOPS media with 0.2% glucose	Planktonic_Stationary_rep1
GSM341921	Planktonic stationary phase in MOPS media with 0.2% glucose	Planktonic_Stationary_rep2
GSM341922	Planktonic stationary phase in MOPS media with 0.2% glucose	Planktonic_Stationary_rep3
GSM344439	TG1/pBS(Kan)-TOM-Green/pMMB277-IsoILR1-GSHI, cis-DCE	TG1/pBS(Kan)-TOM-Green/pMMB277-IsoILR1-GSHI, cis-DCE
GSM344440	TG1/pBS(Kan)/pMMB277, cis-DCE	TG1/pBS(Kan)/pMMB277, cis-DCE
GSM344443	BW25113, water (negative control)	BW25113, water (negative control)
GSM344444	BW25113, H2O2	BW25113, H2O2
GSM344445	BW25113 ygiW, water (negative control)	BW25113 ygiW, water (negative control)
GSM344446	BW25113 ychH, water (negative control)	BW25113 ychH, water (negative control)
GSM344447	BW25113 ygiW, H2O2	BW25113 ygiW, H2O2
GSM344448	BW25113 ychH, H2O2	BW25113 ychH, H2O2
GSM365251	Channel 1	TG1/pBS(Kan)-TOM-Green/pMMB277-IsoILR1-GSHI 2nd
GSM365252	Channel 1	TG1/pBS(Kan)/pMMB277 2nd
GSM350095	BW25113 fhlA/pCA24N-FhlA	BW25113 fhlA/pCA24N-FhlA after 30 min. of anaerobic incubation in modified-complex 20 mM formate at 37oC
GSM350102	BW25113 fhlA/pCA24N-FhlA133	BW25113 fhlA/pCA24N-FhlA133 after 30 min. of anaerobic incubation in modified-complex 20 mM formate at 37oC
GSM351280	E. coli_15min_anaerobic	E. coli_15min_ANA_2
GSM351281	E.coli_15min_CORM-2 treated_anaerobic	E.coli_15min_CORM_ANA_2
GSM351282	E.coli_15min_anaerobic	E.coli_15min_ANA_1
GSM351294	E.coli_15min_CORM-2 treated_anaerobic	E.coli_15min_CORM_ANA_1
GSM351295	E.coli_15min_aerobic	E.coli_15min_AE_2
GSM351296	E.coli_15min_CORM-2 treated_aerobic	E.coli_15min_CORM_AE_2
GSM351297	E.coli_15min_aerobic	E.coli_15min_AE_1
GSM351304	E.coli_15min_CORM-2 treated_aerobic	E.coli_15min_CORM_AE_1
GSM352903	E. coli BW25113 ompA/pCA24N suspension cells	BW25113 ompA/pCA24N
GSM352904	E. coli K-12 ompA/pCA24N_ompA suspension cells	BW25113 ompA/pCA24N_ompA
GSM352905	E. coli K-12 BW25113 ompA polystyrene biofilm cells	BW25113 ompA polystyrene biofilm cells
GSM352906	E. coli K-12 BW25113 wild type polystyrene biofilm cells	BW25113 wild type polystyrene biofilm cells
GSM414725	E. coli K-12 BW25113 wild type polystyrene biofilm cells	BW25113 w/t LB 15 h 37C polystyrene biofilm cell (repeat)
GSM414728	E. coli K-12 BW25113 ompA mutant polystyrene biofilm cells	BW25113 ompA mutant LB 15 h 37C polystyrene biofilm cell (repeat)
GSM355059	E. coli K-12 BW25113 wt at OD600=0.5 LB 37C suspension cell	BW25113 wt at OD600=0.5 LB 37C suspension cell
GSM355060	E. coli K-12 BW25113 mqsR mutant at OD600=0.5 LB 37C suspension cell	BW25113 mqsR mutant at OD600=0.5 LB 37C suspension cell
GSM355061	E. coli K-12 BW25113/pCA24N at OD600=0.5 LB 37C 2 mM IPTG suspension cell	BW25113/pCA24N at OD600=0.5 LB 37C 2 mM IPTG suspension cell
GSM355062	E. coli K-12 BW25113/pCA24N-mqsR at OD600=0.5 LB 37C 2 mM IPTG suspension cell	BW25113/pCA24N-mqsR at OD600=0.5 LB 37C 2 mM IPTG suspension cell
GSM356730	EA2_101206W_PS03_#415	E.coli O157:H7 growth in the presence of Hep-2 cells rep 1
GSM356731	EA2_101206W_PS02_#412	E.coli O157:H7 growth in minimal media rep 1
GSM356732	EA2_101206W_PS01_#501	E.coli O157:H7 growth in Penassay broth rep 1
GSM356733	EA2_082907W_PS03_CM-S3-A9	E.coli O157:H7 growth in the presence of Hep-2 cells rep 2
GSM356734	EA2_082907W_PS01_P-A10	E.coli O157:H7 growth in Penassay broth rep 2
GSM356735	EA2_022207W_PS09_(12)4E29	E.coli O157:H7 growth in the presence of Hep-2 cells rep 3
GSM356736	EA2_022207W_PS09_(10)2D301	E.coli O157:H7 growth in minimal media rep 2
GSM356737	EA2_022207W_PS09_(9)1E301	E.coli O157:H7 growth in Penassay broth rep 3
GSM356738	EA2_022207W_PS09_(8)1D301	E.coli O157:H7 growth in Penassay broth rep 4
GSM356739	EA2_022207W_PS09_(6)2241	E.coli O157:H7 growth in minimal media rep 3
GSM356740	EA2_022207W_PS09_(5)1241	E.coli O157:H7 growth in Penassay broth rep 5
GSM356741	EA2_022207W_PS09_(4)3231	E.coli O157:H7 growth in the presence of Hep-2 cells rep 4
GSM356742	EA2_022207W_PS09_(3)2231	E.coli O157:H7 growth in minimal media rep 4
GSM356743	EA2_022207W_PS09_(1)3151	E.coli O157:H7 growth in the presence of Hep-2 cells rep 5
GSM356744	EA2_012508W_PS04_4108	E.coli O157:H7 growth in minimal media in 5%CO2 rep 1
GSM356745	EA2_012508W_PS03_CMCO2	E.coli O157:H7 growth in minimal media in 5%CO2 rep 2
GSM356746	EA2_012508W_PS02_CMCO2-2	E.coli O157:H7 growth in minimal media in 5%CO2 rep 3
GSM356747	EA2_012508W_PS01_CMCO2-1	E.coli O157:H7 growth in minimal media in 5%CO2 rep 4
GSM361555	BW25113 w/t LB 37C planktonic cells OD=0.5	BW25113 w/t LB 37C planktonic cells OD=0.5 LB
GSM361556	BW25113 CP4-57-deficient strain at OD=0.5 LB	BW25113 CP4-57-deficient strain at OD=0.5 LB 37C
GSM370094	wildtype colony morphology	wildtype, brain heart infusion agar, rep 1
GSM370095	wildtype colony morphology	wildtype, brain heart infusion agar, rep 2
GSM370096	wildtype colony morphology	wildtype, brain heart infusion agar, rep 3
GSM375831	Escherichia coli 8624	Escherichia coli 8624 grown in DMEM with AI3
GSM375832	Escherichia coli 8624	Escherichia coli 8624 grown in DMEM with Epinephrine
GSM375833	Escherichia coli 8624 kdpE deletion mutant	Escherichia coli 8624 kdpE deletion mutant grown in DMEM
GSM375834	Escherichia coli 8624 in LB	Escherichia coli 8624 grown in LB
GSM375836	Escherichia coli 8624 qseB deletion mutant	Escherichia coli 8624 qseB deletion mutant grown in DMEM
GSM375837	Escherichia coli 8624 qseC mutant in DMEM	Escherichia coli 8624 qseC deletion mutant grown in DMEM
GSM375838	Escherichia coli 8624 qseC mutant in DMEM with AI3	Escherichia coli 8624 qseC deletion mutant grown in DMEM with AI3
GSM375839	Escherichia coli 8624 qseC mutant in DMEM with epinephrine	Escherichia coli 8624 qseC deletion mutant grown in DMEM with Epinephrine
GSM375840	Escherichia coli 8624 qseC mutant in LB	Escherichia coli 8624 qseC mutant grown in LB
GSM384835	UTI89 at OD600=1.5 in LB-MES	UTI89 LB-MES, rep1
GSM384836	UTI89 at OD600=1.5 in LB-MES	UTI89 LB-MES, rep2
GSM384837	UTI89 at OD600=1.5 in LB-MES +3 mM ASN	UTI89 LB-MES +3 mM ASN, rep1
GSM384838	UTI89 at OD600=1.5 in LB-MES +3 mM ASN	UTI89 LB-MES +3 mM ASN, rep2
GSM386644	E.coli wt cells overexpressing GraL for 15 minutes	wt strain, pGraL, biological rep1, short term
GSM386645	E.coli wt cells overexpressing GraL for 15 minutes	wt strain, pGraL, biological rep2, short term
GSM386646	E.coli wt cells overexpressing GraL for 15 minutes	wt strain, pGraL, biological rep3, short term
GSM386647	E.coli wt cells with vector control	wt strain, pvector, biological rep1, short term
GSM386648	E.coli wt cells with vector control	wt strain, pvector, biological rep2, short term
GSM386649	E.coli wt cells with vector control	wt strain, pvector, biological rep3, short term
GSM386650	E.coli ppGpp0 cells overexpressing GraL for 15 minutes	ppGpp0 strain, pGraL, biological rep1, short term
GSM386651	E.coli ppGpp0 cells overexpressing GraL for 15 minutes	ppGpp0 strain, pGraL, biological rep2, short term
GSM386652	E.coli ppGpp0 cells overexpressing GraL for 15 minutes	ppGpp0 strain, pGraL, biological rep3, short term
GSM386653	E.coli ppGpp0 cells with vector control	ppGpp0 strain, pvector, biological rep1, short term
GSM386654	E.coli ppGpp0 cells with vector control	ppGpp0 strain, pvector, biological rep2, short term
GSM386655	E.coli ppGpp0 cells with vector control	ppGpp0 strain, pvector, biological rep3, short term
GSM386656	E.coli wt cells overexpressing GraL	wt strain, pGraL, biological rep1, long term
GSM386657	E.coli wt cells overexpressing GraL	wt strain, pGraL, biological rep2, long term
GSM386658	E.coli wt cells overexpressing GraL	wt strain, pGraL, biological rep3, long term
GSM386659	E.coli wt cells with vector control	wt strain, pvector, biological rep, long term
GSM386660	E.coli wt cells with vector control	wt strain, pvector, biological rep2, long term
GSM386661	E.coli wt cells with vector control	wt strain, pvector, biological rep3, long term
GSM386662	E.coli ppGpp0 cells overexpressing GraL	ppGpp0 strain, pGraL, biological rep1, long term
GSM386663	E.coli ppGpp0 cells overexpressing GraL	ppGpp0 strain, pGraL, biological rep2, long term
GSM386664	E.coli ppGpp0 cells overexpressing GraL	ppGpp0 strain, pGraL, biological rep3, long term
GSM386665	E.coli ppGpp0 cells with vector control	ppGpp0 strain, pvector, biological rep1, long term
GSM386666	E.coli ppGpp0 cells with vector control	ppGpp0 strain, pvector, biological rep2, long term
GSM386667	E.coli ppGpp0 cells with vector control	ppGpp0 strain, pvector, biological rep3, long term
GSM388696	Escherichia K-12 rpoC mutant: del27	del27_glycerolM9_mid-log_rep1
GSM388697	Escherichia K-12 rpoC mutant: del27	del27_glycerolM9_mid-log_rep2
GSM388698	Escherichia K-12 rpoC mutant: del27	del27_glycerolM9_mid-log_rep3
GSM388700	Escherichia K-12 rpoC mutant: eBOP42	eBOP42_glycerolM9_mid-log_rep1
GSM388701	Escherichia K-12 rpoC mutant: eBOP42	eBOP42_glycerolM9_mid-log_rep2
GSM388702	Escherichia K-12 rpoC mutant: eBOP42	eBOP42_glycerolM9_mid-log_rep3
GSM388704	Escherichia K-12 rpoC mutant: eBOP43	eBOP43_glycerolM9_mid-log_rep1
GSM388705	Escherichia K-12 rpoC mutant: eBOP43	eBOP43_glycerolM9_mid-log_rep2
GSM388712	Escherichia K-12 rpoC mutant: eBOP43	eBOP43_glycerolM9_mid-log_rep3
GSM388713	Escherichia K-12 MG1655 (wild-type)	wild-type_glycerolM9_mid-log_rep1
GSM388714	Escherichia K-12 MG1655 (wild-type)	wild-type_glycerolM9_mid-log_rep2
GSM388715	Escherichia K-12 MG1655 (wild-type)	wild-type_glycerolM9_mid-log_rep3
GSM389279	Escherichia coli cells with 30 min incubation in chlorine	Sakai, chlorine, biological rep1
GSM389280	Escherichia coli cells with 30 min incubation in chlorine	TW, chlorine, biological rep1
GSM389281	Escherichia coli cells with 30 min incubation in H2O2	Sakai, H2O2, biological rep1
GSM389282	Escherichia coli cells with 30 min incubation in H2O3	TW, H2O2, biological rep1
GSM389283	Escherichia coli cells with 30 min incubation in BHI broth	Sakai, control, biological rep1
GSM389284	Escherichia coli cells with 30 min incubation in BHI broth	TW, control, biological rep1
GSM389285	Escherichia coli cells with 30 min incubation in chlorine	Sakai, chlorine, biological rep2
GSM389286	Escherichia coli cells with 30 min incubation in chlorine	TW, chlorine, biological rep2
GSM389287	Escherichia coli cells with 30 min incubation in H2O2	Sakai, H2O2, biological rep2
GSM389288	Escherichia coli cells with 30 min incubation in H2O3	TW, H2O2, biological rep2
GSM389289	Escherichia coli cells with 30 min incubation in BHI broth	Sakai, control, biological rep2
GSM389290	Escherichia coli cells with 30 min incubation in BHI broth	TW, control, biological rep2
GSM434734	Exponential phase culture of EDL933 wild type in LB at OD600 of 0.3	Exp-WT-rep1
GSM434735	Exponential phase culture of EDL933 wild type in LB at OD600 of 0.3	Exp-WT-rep2
GSM434736	Exponential phase culture of EDL933 wild type in LB at OD600 of 0.3	Exp-WT-rep3
GSM434737	Exponential phase culture of EDL933 rpoS mutants in LB at OD600 of 0.3	Exp-rpoS-rep1
GSM434738	Exponential phase culture of EDL933 rpoS mutants in LB at OD600 of 0.3	Exp-rpoS-rep2
GSM434739	Exponential phase culture of EDL933 rpoS mutants in LB at OD600 of 0.3	Exp-rpoS-rep3
GSM434740	Stationary phase culture of EDL933 wild type in LB at OD600 of 1.5	Stat-WT-rep1
GSM434741	Stationary phase culture of EDL933 wild type in LB at OD600 of 1.5	Stat-WT-rep2
GSM434742	Stationary phase culture of EDL933 wild type in LB at OD600 of 1.5	Stat-WT-rep3
GSM434743	Stationary phase culture of EDL933 rpoS mutants in LB at OD600 of 1.5	Stat-rpoS-rep1
GSM434744	Stationary phase culture of EDL933 rpoS mutants in LB at OD600 of 1.5	Stat-rpoS-rep2
GSM434745	Stationary phase culture of EDL933 rpoS mutants in LB at OD600 of 1.5	Stat-rpoS-rep3
GSM435772	E. coli K12 strain JM109 harboring pMG1	pMG1 0 min, biological rep1
GSM435773	E. coli K12 strain JM109 harboring pMG1	pMG1 0 min, biological rep2
GSM435774	E. coli K12 strain JM109 harboring pMG1	pMG1 0 min, biological rep3
GSM435775	E. coli K12 strain JM109 harboring pMG1	pMG1 10 min, biological rep1
GSM435776	E. coli K12 strain JM109 harboring pMG1	pMG1 10 min, biological rep2
GSM435777	E. coli K12 strain JM109 harboring pMG1	pMG1 10 min, biological rep3
GSM435778	E. coli K12 strain JM109 harboring pMG1	pMG1 60 min, biological rep1
GSM435779	E. coli K12 strain JM109 harboring pMG1	pMG1 60 min, biological rep2
GSM435780	E. coli K12 strain JM109 harboring pMG1	pMG1 60 min, biological rep3
GSM435781	E. coli K12 strain JM109 harboring pMG1-IrrE	pMG1_IrrE 0 min, biological rep1
GSM435782	E. coli K12 strain JM109 harboring pMG1-IrrE	pMG1_IrrE 0 min, biological rep2
GSM435783	E. coli K12 strain JM109 harboring pMG1-IrrE	pMG1_IrrE 0 min, biological rep3
GSM435784	E. coli K12 strain JM109 harboring pMG1-IrrE	pMG1_IrrE 10 min, biological rep1
GSM435785	E. coli K12 strain JM109 harboring pMG1-IrrE	pMG1_IrrE 10 min, biological rep2
GSM435786	E. coli K12 strain JM109 harboring pMG1-IrrE	pMG1_IrrE 10 min, biological rep3
GSM435787	E. coli K12 strain JM109 harboring pMG1-IrrE	pMG1_IrrE 60 min, biological rep1
GSM435788	E. coli K12 strain JM109 harboring pMG1-IrrE	pMG1_IrrE 60 min, biological rep2
GSM435789	E. coli K12 strain JM109 harboring pMG1-IrrE	pMG1_IrrE 60 min, biological rep3
GSM436883	Escherichia coli BW25113（rpoS-）	BW25113 (rpoS-) log, biological rep1
GSM436884	Escherichia coli BW25113（rpoS-）	BW25113 (rpoS-) log, biological rep2
GSM436885	Escherichia coli BW25113（rpoS-）	BW25113 (rpoS-) log, biological rep3
GSM436886	Escherichia coli BW25113（rpoS-）	BW25113 (rpoS-) stationary, biological rep1
GSM436887	Escherichia coli BW25113（rpoS-）	BW25113 (rpoS-) stationary, biological rep2
GSM436888	Escherichia coli BW25113（rpoS-）	BW25113 (rpoS-) stationary, biological rep3
GSM436889	Escherichia coli BW25113	BW25113 log, biological rep1
GSM436890	Escherichia coli BW25113	BW25113 log, biological rep2
GSM436891	Escherichia coli BW25113	BW25113 log, biological rep3
GSM436892	Escherichia coli BW25113	BW25113 stationary, biological rep1
GSM436893	Escherichia coli BW25113	BW25113 stationary, biological rep2
GSM436894	Escherichia coli BW25113	BW25113 stationary, biological rep3
GSM436895	Escherichia coli BW25113（rpoS-）	BW25113 (rpoS-) log ethanol shock, biological rep1
GSM436896	Escherichia coli BW25113（rpoS-）	BW25113 (rpoS-) log ethanol shock, biological rep2
GSM436897	Escherichia coli BW25113（rpoS-）	BW25113 (rpoS-) log ethanol shock, biological rep3
GSM436898	Escherichia coli BW25113（rpoS-）	BW25113 (rpoS-) stationary ethanol shock, biological rep1
GSM436899	Escherichia coli BW25113（rpoS-）	BW25113 (rpoS-) stationary ethanol shock, biological rep2
GSM436900	Escherichia coli BW25113（rpoS-）	BW25113 (rpoS-) stationary ethanol shock, biological rep3
GSM436901	Escherichia coli BW25113	BW25113 log ethanol shock, biological rep1
GSM436902	Escherichia coli BW25113	BW25113 log ethanol shock, biological rep2
GSM436903	Escherichia coli BW25113	BW25113 log ethanol shock, biological rep3
GSM436904	Escherichia coli BW25113	BW25113 stationary ethanol shock, biological rep1
GSM436905	Escherichia coli BW25113	BW25113 stationary ethanol shock, biological rep2
GSM436906	Escherichia coli BW25113	BW25113 stationary ethanol shock, biological rep3
GSM438111	W3110	CRP LB+Glucose, Biological Rep1
GSM438112	W3110	CRP LB+Glucose, Biological Rep2
GSM438113	W3110	CRP LB+Glucose, Biological Rep3
GSM438114	W3110	CRP LB, Biological Rep1
GSM438115	W3110	CRP LB, Biological Rep2
GSM438116	W3110	CRP LB, Biological Rep3
GSM438117	PC05 (W3110,CRP*)	CRP* LB+Glucose, Biological Rep1
GSM438118	PC05 (W3110,CRP*)	CRP* LB+Glucose, Biological Rep2
GSM438119	PC05 (W3110,CRP*)	CRP* LB+Glucose, Biological Rep3
GSM438120	PC05 (W3110,CRP*)	CRP* LB+Glucose, Biological Rep4
GSM438121	PC05 (W3110,CRP*)	CRP* LB+Glucose, Biological Rep5
GSM438122	PC05 (W3110,CRP*)	CRP* LB, Biological Rep1
GSM438123	PC05 (W3110,CRP*)	CRP* LB, Biological Rep2
GSM438124	PC05 (W3110,CRP*)	CRP* LB, Biological Rep3
GSM445914	pCA24N-hns biofilm	pCA24N-hns biofilm
GSM445915	pCA24N-hnsK57N biofilm	pCA24N-hnsK57N biofilm
GSM452795	qseA deletion mutant	Escherichia coli 8624 qseA deletion mutant
GSM452798	wild-type	Escherichia coli 8624 wild-type
GSM460022	E. coli O157 invitro culture	E. coli O157:H7_rep1
GSM460023	E. coli O157 invitro culture	E.coli O157:H7_rep2
GSM460024	E. coli O157:H7 and B. longum invitro coculture	E.coli O157:H7 and B. longum_rep1
GSM460025	E. coli O157:H7 and B. longum invitro coculture	E.coli O157:H7 and B. longum_rep2
GSM462878	E. coli treated with DMSO as a control	E. coli-DMSO-rep1
GSM462879	E. coli treated with DMSO as a control	E. coli-DMSO-rep2
GSM462880	E. coli treated with DMSO as a control	E. coli-DMSO-rep3
GSM462881	E. coli treated with CHIR-090	E. coli-CHIR-090-rep1
GSM462882	E. coli treated with CHIR-090	E. coli-CHIR-090-rep2
GSM462883	E. coli treated with CHIR-090	E. coli-CHIR-090-rep3
GSM467152	wild type	BW25113 wild-type persister
GSM467153	hfq deletion mutant	BW25113 hfq mutant
GSM469137	wild type; derivative of E. coli MG 1655, 1	wild type; derivative of E. coli MG 1655, 1
GSM469138	wild type; derivative of E. coli MG 1655, 2	wild type; derivative of E. coli MG 1655, 2
GSM469139	mgrR knockout mutation, 1	mgrR knockout mutation, 1
GSM469140	mgrR knockout mutation, 2	mgrR knockout mutation, 2
GSM469141	mgrR knockout mutation containing pBR Plac plasmid, 1	mgrR knockout mutation containing pBR Plac plasmid, 1
GSM469142	mgrR knockout mutation containing pBR Plac plasmid, 2	mgrR knockout mutation containing pBR Plac plasmid, 2
GSM469143	mgrR knockout mutation containing pBR Plac mgrR plasmid, 1	mgrR knockout mutation containing pBR Plac mgrR plasmid, 1
GSM469144	mgrR knockout mutation containing pBR Plac mgrR plasmid, 2	mgrR knockout mutation containing pBR Plac mgrR plasmid, 2
GSM469641	frdC	BW25113 frdC 5h 37C in glycerol medium
GSM469642	HW2	BW25113 HW2 5h 37C in glycerol medium
GSM490261	Escherichia coli with empty vector (pAZ3)	MG1655 pAZ3#1 + arabinose
GSM490262	Escherichia coli with pFnrS	MG1655 pFnrS#1 + arabinose
GSM490263	Escherichia coli with empty vector (pAZ3)	MG1655 pAZ3#2 + arabinose
GSM490264	Escherichia coli with pFnrS	MG1655 pFnrS#2 + arabinose
GSM490265	Escherichia coli with empty vector (pAZ3)	MG1655 pAZ3#3 + arabinose
GSM490266	Escherichia coli with pFnrS	MG1655 pFnrS#3 + arabinose
GSM495718	EDL 933 at 37oC at OD 1.0	EDL 933 at 37oC at OD 1.0
GSM495719	EDL 933 with 0.1 mg/ml IAN at 37oC at OD 1.0	EDL 933 with 0.1 mg/ml IAN at 37oC at OD 1.0
GSM498647	Channel 1	E. coli O157:H7 EDL933 in LB at 37oC at OD 4.0
GSM498648	Channel 1	E. coli O157:H7 86-24 in LB at 37oC at OD 4.0
GSM502093	Exponential phase culture of MG1655 wild type in M9 at OD600 of 0.3	WT_rep1
GSM502094	Exponential phase culture of MG1655 wild type in M9 at OD600 of 0.3	WT_rep2
GSM502095	Exponential phase culture of MG1655 wild type in M9 at OD600 of 0.3	WT_rep3
GSM502096	Exponential phase culture of MG1655 rpoS mutants in M9 at OD600 of 0.3	rpoS_rep1
GSM502097	Exponential phase culture of MG1655 rpoS mutants in M9 at OD600 of 0.3	rpoS_rep2
GSM502098	Exponential phase culture of MG1655 rpoS mutants in M9 at OD600 of 0.3	rpoS_rep3
GSM502099	Exponential phase culture of MG1655 rpoN mutants in M9 at OD600 of 0.3	rpoN_rep1
GSM502100	Exponential phase culture of MG1655 rpoN mutants in M9 at OD600 of 0.3	rpoN_rep2
GSM502101	Exponential phase culture of MG1655 rpoN mutants in M9 at OD600 of 0.3	rpoN_rep3
GSM510322	Reference Strain, mid exponential phase	Reference Strain rep1
GSM510323	Reference Strain, mid exponential phase	Reference Strain rep2
GSM510324	Reference Strain, mid exponential phase	Reference Strain rep3
GSM510325	NOX strain, mid exponential phase	NOX strain rep1
GSM510326	NOX strain, mid exponential phase	NOX strain rep2
GSM510327	NOX strain, mid exponential phase	NOX strain rep3
GSM510328	ATPase strain, mid exponential phase	ATPase strain rep1
GSM510329	ATPase strain, mid exponential phase	ATPase strain rep2
GSM510330	ATPase strain, mid exponential phase	ATPase strain rep3
GSM510398	E.coli O157:H7 in LB at mid-log phase	ctrl1
GSM510399	E.coli O157:H7 in LB at mid-log phase	ctrl2
GSM510400	E.coli O157:H7 in LB at mid-log phase	ctrl3
GSM510401	E.coli O157:H7 in LB at mid-log phase	bile+1
GSM510402	E.coli O157:H7 in LB at mid-log phase	bile+2
GSM510403	E.coli O157:H7 in LB at mid-log phase	bile+3
GSM511647	EHEC DMEM O.D.600 1.0	EHEC WT DMEM
GSM511648	EHEC QseD mutant DMEM O.D.600 1.0	EHEC QseD Mutant DMEM
GSM511649	K-12 DMEM O.D.600 1.0	K-12 WT DMEM
GSM511650	K-12 QseD mutant DMEM O.D.600 1.0	K-12 QseD Mutant DMEM
GSM511651	K-12 LB O.D.600 1.0	K-12 WT LB
GSM511652	K-12 QseD mutant LB O.D.600 1.0	K-12 QseD Mutant LB
GSM538619	wild type bacterial cells harvested at mid log growth phase	MG1655 biological rep1
GSM538620	wild type bacterial cells harvested at mid log growth phase	MG1655 biological rep2
GSM538621	rimO mutant cells harvested at mid log growth phase	MG1655 rimO biological rep1
GSM538622	rimO mutant cells harvested at mid log growth phase	MG1655 rimO biological rep2
GSM538623	rimO mutant cells harvested at mid log growth phase	MG1655 rimO Tet biological rep1
GSM538624	rimO mutant cells harvested at mid log growth phase	MG1655 rimO Tet biological rep2
GSM538625	ycaO mutant cells harvested at mid log growth phase	MG1655 ycaO biological rep1
GSM538626	ycaO mutant cells harvested at mid log growth phase	MG1655 ycaO biological rep2
GSM539342	biofilm cells, hha/pCA24N-hha	BW25113 hha/pCA24N-hha dispersal 16+1h 1mM IPTG in LBglu 37oC
GSM539343	biofilm cells, hha/pCA24N-hha13D6	BW25113 hha/pCA24N-hha13D6 dispersal 16+1h 1mM IPTG in LBglu 37oC
GSM539344	biofilm cells, hha/pCA24N-hha	BW25113 hha/pCA24N-hha biofilm 7h 1mM IPTG in LBglu 37oC
GSM539345	biofilm cells, hha/pCA24N-hha24E9	BW25113 hha/pCA24N-hha24E9 biofilm 7h 1mM IPTG in LBglu 37oC
GSM540096	Escherichia coli P2	strain P2, biological rep1
GSM540097	Escherichia coli P2	strain P2, biological rep2
GSM540098	Escherichia coli P2	strain P2, biological rep3
GSM540099	Escherichia coli rpoD3	strain rpoD3, biological rep1
GSM540100	Escherichia coli rpoD3	strain rpoD3, biological rep2
GSM540101	Escherichia coli rpoD3	strain rpoD3, biological rep3
GSM540102	Escherichia coli rpoA14	strain rpoA14, biological rep1
GSM540103	Escherichia coli rpoA14	strain rpoA14, biological rep2
GSM540104	Escherichia coli rpoA14	strain rpoA14, biological rep3
GSM540105	Escherichia coli rpoA27	strain rpoA27, biological rep1
GSM540106	Escherichia coli rpoA27	strain rpoA27, biological rep2
GSM540107	Escherichia coli rpoA27	strain rpoA27, biological rep3
GSM543291	E. coli MG1655 wildtype strain grows under phosphate starvation condition	Wildtype strain, rep1
GSM543292	E. coli MG1655 PhoB knock-out strain grows under phosphate starvation condition	PhoB knock-out strain, rep1
GSM543293	E. coli MG1655 wildtype strain grows under phosphate starvation condition	wildtype strain, rep2
GSM543294	E. coli MG1655 PhoB knock-out strain grows under phosphate starvation condition	PhoB knock-out strain, rep2
GSM543453	E. coli MG1655, M9 media with 4 g/L glucose, aerobic, log phase	WT +O2 1
GSM543454	E. coli MG1655, M9 media with 4 g/L glucose, aerobic, log phase	WT +O2 2
GSM543455	E. coli MG1655, M9 media with 4 g/L glucose, aerobic, log phase	WT +O2 3
GSM543456	E. coli MG1655, M9 media with 4 g/L glucose, anaerobic, log phase	WT -O2 1
GSM543457	E. coli MG1655, M9 media with 4 g/L glucose, anaerobic, log phase	WT -O2 2
GSM543458	E. coli MG1655, M9 media with 4 g/L glucose, anaerobic, log phase	WT -O2 3
GSM543459	Respiratory defecient E. coli mutant (ECOM4), M9 media with 4 g/L glucose, aerobic, log phase	E4 +O2 1
GSM543460	Respiratory defecient E. coli mutant (ECOM4), M9 media with 4 g/L glucose, aerobic, log phase	E4 +O2 2
GSM543461	Respiratory defecient E. coli mutant (ECOM4), M9 media with 4 g/L glucose, aerobic, log phase	E4 +O2 3
GSM543462	Respiratory defecient E. coli mutant (ECOM4), M9 media with 4 g/L glucose, aerobic, log phase	E4 -O2 1
GSM543463	Respiratory defecient E. coli mutant (ECOM4), M9 media with 4 g/L glucose, aerobic, log phase	E4 -O2 2
GSM543464	Respiratory defecient E. coli mutant (ECOM4), M9 media with 4 g/L glucose, aerobic, log phase	E4 -O2 3
GSM544425	APEC clpV deleted mutant, compared to wild type strain, grown at 37°C, OD=0.8	APEC clpV deleted mutant compared to APEC wild type
GSM544426	APEC hcp deleted mutant, compared to wild type strain, grown at 37°C, OD=0.8	APEC hcp deleted mutant compared to APEC wild type
GSM544427	APEC icmF deleted mutant, compared to wild type strain, grown at 37°C, OD=0.8	APEC icmF deleted mutant compared to APEC wild type
GSM544428	APEC Wild Type (0R:H10)	APEC wild type, strain 362, 0R:H10
GSM548528	biofilm cells from E. coli K-12 wild type	BW25113 WT
GSM548529	biofilm cells of E. coli K-12 yjgI mutant	BW25113 bdcA (yjgI) mutant
GSM552709	RNA produced by in vitro transcription, with RNA polymerase E σ70, of 2 ug of genomic DNA from E. coli MG1655 digested with EcoRI	E.coli_IVT-RNA_sigma70-1
GSM552710	RNA produced by in vitro transcription, with RNA polymerase E σ70, of 2 ug of genomic DNA from E. coli MG1655 digested with EcoRI	E.coli_IVT-RNA_sigma70-2
GSM552711	RNA produced by in vitro transcription, with RNA polymerase E σS, of 2 ug of genomic DNA from E. coli MG1655 digested with EcoRI	E.coli_IVT-RNA_sigmaS
GSM552712	RNA produced by in vitro transcription, with RNA polymerase E σS, of 2 ug of genomic DNA from E. coli MG1655 digested with EcoRI	E.coli_IVT-RNA_sigmaS-2
GSM554443	EHEC grown in fresh medium for 1 h	EHEC grown in fresh medium for 1 h
GSM554444	EHEC grown in conditioned medium for 1 h	EHEC grown in conditioned medium for 1 h
GSM554445	EHEC grown in fresh medium for 3 h	EHEC grown in fresh medium for 3 h
GSM554446	EHEC grown in conditioned medium for 3 h	EHEC grown in conditioned medium for 3 h
GSM573253	BW25113 treated with nalidixic acid	BW25113 wild type treated with nalidixic acid
GSM573254	BW25113 untreated	BW25113 wild type untreated
GSM573255	BW25113 treated with azlocillin	BW25113 wild type treated with azlocillin
GSM574246	cDNA made from strain KMD extracted from mouse kidney on day 2 post infection	KMD 1
GSM574247	cDNA made from strain KMD extracted from mouse kidney on day 2 post infection	KMD 2
GSM574248	cDNA made from strain KMD extracted from mouse kidney on day 2 post infection	KMD 3
GSM574249	cDNA made from strain PC1012(marArobsoxS) extracted from mouse kidney on day 2 post infection	PC 1
GSM574250	cDNA made from strain PC1012(marArobsoxS) extracted from mouse kidney on day 2 post infection	PC 2
GSM574251	cDNA made from strain PC1012(marArobsoxS) extracted from mouse kidney on day 2 post infection	PC 3
GSM604756	E. coli MG1655 grown in MOPS minimal medium containing 10 mM fumarate	WT_anaerobic_fumarate_rep1
GSM604757	E. coli MG1655 grown in MOPS minimal medium containing 10 mM fumarate	WT_anaerobic_fumarate_rep2
GSM604758	E. coli MG1655 grown in MOPS minimal medium containing 10 mM nitrate	WT_anaerobic_nitrate_rep1
GSM604759	E. coli MG1655 grown in MOPS minimal medium containing 10 mM nitrate	WT_anaerobic_nitrate_rep2
GSM604760	E. coli oxyR null grown in MOPS minimal medium containing 10 mM fumarate	oxyR mut_anaerobic_fumarate_rep1
GSM604761	E. coli oxyR null grown in MOPS minimal medium containing 10 mM fumarate	oxyR mut_anaerobic_fumarate_rep2
GSM604762	E. coli oxyR null grown in MOPS minimal medium containing 10 mM nitrate	oxyR mut_anaerobic_nitrate_rep1
GSM604763	E. coli oxyR null grown in MOPS minimal medium containing 10 mM nitrate	oxyR mut_anaerobic_nitrate_rep2
GSM611680	MG1655 lacIq harboring pBRplac, experiment #1	MG1655 lacIq pBRplac #1
GSM611681	MG1655 lacIq harboring pSpot42 experiment #1	MG1655 lacIq pSpot42 #1
GSM611682	MG1655 lacIq harboring pBRplac, experiment #2	MG1655 lacIq pBRplac #2
GSM611683	MG1655 lacIq harboring pSpot42 experiment #2	MG1655 lacIq pSpot42 #2
GSM611684	MG1655 lacIq harboring pBRplac, experiment #3	MG1655 lacIq pBRplac #3
GSM611685	MG1655 lacIq harboring pSpot42 experiment #3	MG1655 lacIq pSpot42 #3
GSM622787	MG1655 60 min with 10 microM MnCl2	MG1655 60 min with 10 microM MnCl2
GSM622788	DmntR 60 min with 10 microM MnCl2	Delta-mntR 60 min with 10 microM MnCl2
GSM622789	MG1655 10 min with 10 microM MnCl2	MG1655 10 min with 10 microM MnCl2
GSM622790	DmntR 10 min with 10 microM MnCl2	Delta-mntR 10 min with 10 microM MnCl2
GSM632641	CFT073 in LB, after 5 hours of growth.	CFT073_LB_rep1
GSM632642	CFT073 in LB, after 5 hours of growth.	CFT073_LB_rep2
GSM632643	CFT073 in LB, after 5 hours of growth.	CFT073_LB_rep3
GSM632644	CFT073 in LB+PACs (100 μg/mL), after 5 hours of growth.	CFT073_LB+PACs_rep1
GSM632645	CFT073 in LB+PACs (100 μg/mL), after 5 hours of growth.	CFT073_LB+PACs_rep2
GSM632646	CFT073 in LB+PACs (100 μg/mL), after 5 hours of growth.	CFT073_LB+PACs_rep3
GSM654474	E. coli K12 MG1655, wild type cells in M9 minimal medium	Wild type, M9 minimal medium, 1
GSM654475	E. coli K12 MG1655, wild type cells in M9 minimal medium	Wild type, M9 minimal medium, 2
GSM654476	E. coli K12 MG1655, <U+2206>purR strain in M9 minimal media	purR deletion mutant, M9 minimal medium, 1
GSM654477	E. coli K12 MG1655, <U+2206>purR strain in M9 minimal media	purR deletion mutant, M9 minimal medium, 2
GSM654478	E. coli K12 MG1655, wild type cells in M9 minimal medium with 100 μg/ml adenine	Wild type, M9 minimal medium with with 100 μg/ml adenine, 1
GSM654479	E. coli K12 MG1655, wild type cells in M9 minimal medium with 100 μg/ml adenine	Wild type, M9 minimal medium with with 100 μg/ml adenine, 2
GSM654480	E. coli K12 MG1655, <U+2206>purR strain in M9 minimal media with 100 μg/ml adenine	purR deletion mutant, M9 minimal medium with 100 μg/ml adenine, 1
GSM654481	E. coli K12 MG1655, <U+2206>purR strain in M9 minimal media with 100 μg/ml adenine	purR deletion mutant, M9 minimal medium with 100 μg/ml adenine, 2
GSM663157	E. coli and P. aer. Mixed culture	E. coli ZK126 and P. aeruginosa culture rep1
GSM663158	E. coli and P. aer. Mixed culture	E. coli ZK126 and P. aeruginosa culture rep2
GSM663159	E. coli pure culture	E. coli ZK126 pure culture rep1
GSM663160	E. coli pure culture	E. coli ZK126 pure culture rep2
GSM663165	E. coli and P. aer. Mixed culture	E. coli MG1655 and P. aeruginosa culture rep1
GSM663166	E. coli and P. aer. Mixed culture	E. coli MG1655 and P. aeruginosa culture rep2
GSM663167	E. coli pure culture	E. coli MG1655 pure culture rep1
GSM697301	rna extracted from e. coli o157: H7 EDL933 cells grown (7 hrs incubation) in LB at 37oC	E. coli O157:H7 EDL933 in LB at 37oC at 7 hrs incubation
GSM697302	rna extracted from e. coli o157: H7 EDL933 cells grown (7 hrs incubation) in LB at 37oC with 0.05 mg/ml Phloretin	E. coli O157:H7 EDL933 in LB at 37oC at 7 hrs incubation with phloretin
GSM698078	rna extracted from e. coli o157: H7 EDL933 cells grown (7 hrs incubation) in LB at 37oC	E. coli O157:H7 EDL933 in LB at 37oC for 7 hrs incubation
GSM698079	rna extracted from e. coli o157: H7 EDL933 cells grown (7 hrs incubation) in LB at 37oC with 0.5% honey	E. coli O157:H7 EDL933 in LB at 37oC for 7 hrs incubation with honey
GSM701936	CFT073 in K-med	CFT073 K-med biological rep 2
GSM701937	CFT073 in K-med	CFT073 K-med biological rep 3
GSM701938	CFT073 in NaCl	CFT073 NaCl biological rep 1
GSM701939	CFT073 in NaCl	CFT073 NaCl biological rep 2
GSM701940	CFT073 in NaCl	CFT073 NaCl biological rep 3
GSM701941	CFT073 in urea	CFT073 urea biological rep 1
GSM701942	CFT073 in urea	CFT073 urea biological rep 2
GSM701943	CFT073 in urea	CFT073 urea biological rep 3
GSM702192	cell culture	specific growth rate 0.2h-1 0h
GSM702193	cell culture	specific growth rate 0.2h-1 2h
GSM702194	cell culture	specific growth rate 0.2h-1 4h
GSM702195	cell culture	specific growth rate 0.2h-1 6h
GSM702196	cell culture	specific growth rate 0.3h-1 0h
GSM702197	cell culture	specific growth rate 0.3h-1 2h
GSM702198	cell culture	specific growth rate 0.3h-1 4h
GSM702208	cell culture	specific growth rate 0.3h-1 6h
GSM702209	cell culture	specific growth rate 0.4h-1 2h
GSM702210	cell culture	specific growth rate 0.4h-1 4h
GSM702211	cell culture	specific growth rate 0.4h-1 6h
GSM702212	cell culture	specific growth rate 0.4h-1 0h
GSM713186	E.coli ppGpp0 cells with vector control	ppGpp0 strain, pGB2, biological rep1
GSM713187	E.coli ppGpp0 cells with vector control	ppGpp0 strain, pGB2, biological rep2
GSM713188	E.coli ppGpp0 cells overexpressing GreA	ppGpp0 strain, pA, biological rep1
GSM713189	E.coli ppGpp0 cells overexpressing GreA	ppGpp0 strain, pA, biological rep2
GSM713190	E.coli ppGpp0 cells overexpressing GreB	ppGpp0 strain, pB, biological rep1
GSM713191	E.coli ppGpp0 cells overexpressing GreB	ppGpp0 strain, pB, biological rep2
GSM713192	E.coli ppGpp0 dksA- cells with vector control	ppGpp0 strain, dksA-, pGB2, biological rep1
GSM713193	E.coli ppGpp0 dksA- cells with vector control	ppGpp0 strain, dksA-, pGB2, biological rep2
GSM713194	E.coli ppGpp0 dksA- cells overexpressing GreA	ppGpp0 strain, dksA-, pA, biological rep1
GSM713195	E.coli ppGpp0 dksA- cells overexpressing GreA	ppGpp0 strain, dksA-, pA, biological rep2
GSM713196	E.coli ppGpp0 dksA- cells overexpressing GreB	ppGpp0 strain, dksA-, pB, biological rep1
GSM713197	E.coli ppGpp0 dksA- cells overexpressing GreB	ppGpp0 strain, dksA-, pB, biological rep2
GSM720466	O157:H7 EDL933	Wild type rep1
GSM720467	O157:H7 EDL933	Wild type rep2
GSM720468	O157:H7 EDL933	Wild type rep3
GSM720469	O157:H7 EDL933	NO rep1
GSM720470	O157:H7 EDL933	NO rep2
GSM720471	O157:H7 EDL933	NO rep3
GSM720472	O157:H7 EDL933	nsrR Mutant rep1
GSM720473	O157:H7 EDL933	nsrR Mutant rep2
GSM720474	O157:H7 EDL933	nsrR Mutant rep3
GSM723369	E.coli cells at mid-exponential phase	Hly-ycdC+ -rep1
GSM723370	E.coli cells at mid-exponential phase	Hly-ycdC+ -rep2
GSM723371	E.coli cells at mid-exponential phase	Hly-ycdC+ -rep3
GSM723372	E.coli cells at mid-exponential phase	Hly-ycdC- -rep1
GSM723373	E.coli cells at mid-exponential phase	Hly-ycdC- -rep2
GSM723374	E.coli cells at mid-exponential phase	Hly-ycdC- -rep3
GSM728703	Escherichia coli	specific growth rate 0.3h-1 2h
GSM728704	Escherichia coli	specific growth rate 0.3h-1 4h
GSM728731	Escherichia coli	specific growth rate 0.3h-1 6h
GSM728732	Escherichia coli	Control Strain at specific growth rate 0.3h-1 0h
GSM728733	Escherichia coli	Control Strain at specific growth rate 0.3h-1 2h
GSM728734	Escherichia coli	Control Strain at specific growth rate 0.3h-1 4h
GSM728735	Escherichia coli	Control Strain at specific growth rate 0.3h-1 6h
GSM728736	Escherichia coli	CG2 (modified) strain at specific growth rate 0.3h-1 0h
GSM728737	Escherichia coli	CG2 (modified) strain at specific growth rate 0.3h-1 2h
GSM728738	Escherichia coli	CG2 (modified) strain at specific growth rate 0.3h-1 4h
GSM728739	Escherichia coli	CG2 (modified) strain at specific growth rate 0.3h-1 6h
GSM728740	Escherichia coli	CG2 (modified) strain at specific growth rate 0.6h-1 0h
GSM728741	Escherichia coli	CG2 (modified) strain at specific growth rate 0.6h-1 2h
GSM728742	Escherichia coli	CG2 (modified) strain at specific growth rate 0.6h-1 4h
GSM728743	Escherichia coli	CG2 (modified) strain at specific growth rate 0.6h-1 6h
GSM729401	Escherichia coli	Control Strain at specific growth rate 0.5h-1 0h
GSM729406	Escherichia coli	Control Strain at specific growth rate 0.5h-1 6h
GSM729407	Escherichia coli	Control Strain at specific growth rate 0.5h-1 8h
GSM729408	Escherichia coli	Control Strain at specific growth rate 0.5h-1 10h
GSM729409	Escherichia coli	Control Strain at specific growth rate 0.5h-1 16h
GSM729410	Escherichia coli	Control Strain at specific growth rate 0.5h-1 20h
GSM729411	Escherichia coli	Indole treated at specific growth rate 0.5h-1 0h
GSM729424	Escherichia coli	Indole treated at specific growth rate 0.5h-1 5h
GSM729425	Escherichia coli	Indole treated at specific growth rate 0.5h-1 8h
GSM729426	Escherichia coli	Indole treated at specific growth rate 0.5h-1 10h
GSM729427	Escherichia coli	Indole treated at specific growth rate 0.5h-1 16h
GSM738726	cobB/pCA24N	BW25113 cobB/pCA24N under stress conditions
GSM738735	cobB/pCA24N-cobB	BW25113 cobB/pCA24N-cobB under stress conditions
GSM754675	RNA extracted from e. coli o157: H7 EDL933 cells grown (7 hrs incubation) in LB at 37oC with DMSO	E. coli O157:H7 EDL933 in LB at 37oC for 7 hrs incubation with DMSO
GSM754676	RNA extracted from e. coli o157: H7 EDL933 cells grown (7 hrs incubation) in LB at 37oC with 0.1 mg/ml of IAAld	E. coli O157:H7 EDL933 in LB at 37oC for 7 hrs incubation with indole-3-acetaldehyde
GSM754995	Cells in log phase under ethanol stress	mutant E1, biological rep1
GSM754996	Cells in log phase under ethanol stress	mutant E1, biological rep2
GSM754997	Cells in log phase under ethanol stress	mutant E1, biological rep3
GSM754998	Cells in log phase under ethanol stress	wild type E0, biological rep1
GSM754999	Cells in log phase under ethanol stress	wild type E0, biological rep2
GSM755000	Cells in log phase under ethanol stress	wild type E0, biological rep3
GSM759814	Four L clones isolated at 17000 generations from population ara-2, pooled	17KL midlog R1
GSM759815	Four L clones isolated at 17000 generations from population ara-2, pooled	17KL midlog R2
GSM759816	Four L clones isolated at 17000 generations from population ara-2, pooled	17KL midlog R3
GSM759817	Four L clones isolated at 17000 generations from population ara-2, pooled	17KL midlog R4
GSM759818	Four L clones isolated at 17000 generations from population ara-2, pooled	17KL midlog R5
GSM759819	Four S clones isolated at 17000 generations from population ara-2, pooled	17KS midlog R1
GSM759820	Four S clones isolated at 17000 generations from population ara-2, pooled	17KS midlog R2
GSM759821	Four S clones isolated at 17000 generations from population ara-2, pooled	17KS midlog R3
GSM759822	Four S clones isolated at 17000 generations from population ara-2, pooled	17KS midlog R4
GSM759823	Four S clones isolated at 17000 generations from population ara-2, pooled	17KS midlog R5
GSM759824	Four S clones isolated at 17000 generations from population ara-2, pooled	17KS midlog R6
GSM759825	Four L clones isolated at 40000 generations from population ara-2, pooled	40KL midlog R1
GSM759826	Four L clones isolated at 40000 generations from population ara-2, pooled	40KL midlog R2
GSM759827	Four L clones isolated at 40000 generations from population ara-2, pooled	40KL midlog R3
GSM759828	Four L clones isolated at 40000 generations from population ara-2, pooled	40KL midlog R4
GSM759829	Four L clones isolated at 40000 generations from population ara-2, pooled	40KL midlog R5
GSM759830	Four S clones isolated at 40000 generations from population ara-2, pooled	40KS midlog R1
GSM759831	Four S clones isolated at 40000 generations from population ara-2, pooled	40KS midlog R2
GSM759832	Four S clones isolated at 40000 generations from population ara-2, pooled	40KS midlog R3
GSM759833	Four S clones isolated at 40000 generations from population ara-2, pooled	40KS midlog R4
GSM759834	Four S clones isolated at 40000 generations from population ara-2, pooled	40KS midlog R5
GSM759835	Four S clones isolated at 40000 generations from population ara-2, pooled	40KS midlog R6
GSM759836	Four L clones isolated at 6500 generations from population ara-2, pooled	6.5KL midlog R1
GSM759837	Four L clones isolated at 6500 generations from population ara-2, pooled	6.5KL midlog R2
GSM759838	Four L clones isolated at 6500 generations from population ara-2, pooled	6.5KL midlog R3
GSM759839	Four L clones isolated at 6500 generations from population ara-2, pooled	6.5KL midlog R4
GSM759840	Four L clones isolated at 6500 generations from population ara-2, pooled	6.5KL midlog R5
GSM759841	Four L clones isolated at 6500 generations from population ara-2, pooled	6.5KL midlog R6
GSM759842	Four S clones isolated at 6500 generations from population ara-2, pooled	6.5KS midlog R1
GSM759843	Four S clones isolated at 6500 generations from population ara-2, pooled	6.5KS midlog R2
GSM759844	Four S clones isolated at 6500 generations from population ara-2, pooled	6.5KS midlog R3
GSM759845	Four S clones isolated at 6500 generations from population ara-2, pooled	6.5KS midlog R4
GSM759846	Four S clones isolated at 6500 generations from population ara-2, pooled	6.5KS midlog R5
GSM759847	Four S clones isolated at 6500 generations from population ara-2, pooled	6.5KS midlog R6
GSM759848	REL606	Anc midlog R1
GSM759849	REL606	Anc midlog R2
GSM759850	REL606	Anc midlog R3
GSM759851	REL606	Anc midlog R4
GSM759852	REL606	Anc midlog R5
GSM760800	gss-1	gss-1
GSM760801	gss-2	gss-2
GSM760802	gss-3	gss-3
GSM760803	WT-1	WT-1
GSM760804	WT-2	WT-2
GSM760805	WT-3	WT-3
GSM761209	MG1655Δ6/pCA24N-dinJ Ery 10min	MG1655Δ6/pCA24N-dinJ Ery 10min
GSM761210	MG1655 Δ6/pCA24N erythromycin 10min 37°C	MG1655 Δ6/pCA24N erythromycin 10min 37°C
GSM765279	E. coli K12 strain JM109	JM109-1, biological rep1
GSM765280	E. coli K12 strain JM109	JM109-2, biological rep2
GSM765281	E. coli K12 strain JM109	JM109-3, biological rep3
GSM765282	E. coli K12 strain JM109	JM109 GLY-1, biological rep1
GSM765283	E. coli K12 strain JM109	JM109 GLY-2, biological rep2
GSM765284	E. coli K12 strain JM109	JM109 GLY-3, biological rep3
GSM766159	86-24 wild type	Hfq virulence regulation in enterohemorhagic Escherichia coli O157:H7 strain 86-24
GSM766160	86-24 delta hfq	Hfq virulence regulation in enterohemorhagic Escherichia coli O157:H7 strain 86
GSM768837	Wild-type	Wild-type, biological rep 1
GSM768838	Wild-type	Wild-type, biological rep 2
GSM768839	Wild-type	Wild-type, biological rep 3
GSM768840	Mutant	Mutant, biological rep 1
GSM768841	Mutant	Mutant, biological rep 2
GSM768842	Mutant	Mutant, biological rep 3
GSM769217	BW25113 mqsR/pBS(Kan)-mqsR in LB with ampicillin	BW25113 mqsR/pBS(Kan)-mqsR in LB with ampicillin
GSM769219	BW25113 mqsR/pBS(Kan)-mqsR 2-1 in LB with ampicillin	BW25113 mqsR/pBS(Kan)-mqsR 2-1 in LB with ampicillin
GSM770862	E. coli T=20 min, no treatment, rep 1	E. coli control at time=20 min, rep 1
GSM770863	E. coli T=20 min, no treatment, rep 2	E. coli control at time=20 min, rep 2
GSM770864	E. coli T=20 min, no treatment, rep 3	E. coli control at time=20 min, rep 3
GSM770865	E. coli T=20 min after 8.75 μg/mL PMX 10070 treatment, rep 1	E. coli PMX 10070 treatment at time=20 min, rep 1
GSM770866	E. coli T=20 min after 8.75 μg/mL PMX 10070 treatment, rep 2	E. coli PMX 10070 treatment at time=20 min, rep 2
GSM770867	E. coli T=20 min after 8.75 μg/mL PMX 10070 treatment, rep 3	E. coli PMX 10070 treatment at time=20 min, rep 3
GSM770868	E. coli T=20 min after 0.39 μg/mL Polymyxin B treatment, rep 1	E. coli Polymyxin B treatment at time=20 min, rep 1
GSM770869	E. coli T=20 min after 0.39 μg/mL Polymyxin B treatment, rep 2	E. coli Polymyxin B treatment at time=20 min, rep 2
GSM770870	E. coli T=20 min after 0.39 μg/mL Polymyxin B treatment, rep 3	E. coli Polymyxin B treatment at time=20 min, rep 3
GSM770871	E. coli T=60 min, no treatment, rep 1	E. coli control at time=60 min, rep 1
GSM770872	E. coli T=60 min, no treatment, rep 2	E. coli control at time=60 min, rep 2
GSM770873	E. coli T=60 min, no treatment, rep 3	E. coli control at time=60 min, rep 3
GSM770874	E. coli T=60 min after 8.75 μg/mL PMX 10070 treatment, rep 1	E. coli PMX 10070 treatment at time=60 min, rep 1
GSM770875	E. coli T=60 min after 8.75 μg/mL PMX 10070 treatment, rep 2	E. coli PMX 10070 treatment at time=60 min, rep 2
GSM770876	E. coli T=60 min after 8.75 μg/mL PMX 10070 treatment, rep 3	E. coli PMX 10070 treatment at time=60 min, rep 3
GSM770877	E. coli T=60 min after 0.39 μg/mL Polymyxin B treatment, rep 1	E. coli Polymyxin B treatment at time=60 min, rep 1
GSM770878	E. coli T=60 min after 0.39 μg/mL Polymyxin B treatment, rep 2	E. coli Polymyxin B treatment at time=60 min, rep 2
GSM770879	E. coli T=60 min after 0.39 μg/mL Polymyxin B treatment, rep 3	E. coli Polymyxin B treatment at time=60 min, rep 3
GSM838498	qseCqseE mutant grown in DMEM to OD1.0	qseC-qseE grown OD1 DMEM
GSM838499	qseCqseE mutant grown in DMEM with epinephrine to OD1.1	qseC-qseE grown OD1 DMEM with epinephrine
GSM838500	wt grown in DMEM to OD1.0	wt grown OD1 DMEM
GSM838501	wt grown in DMEM with epinephrine to OD1.0	wt grown OD1 DMEM with epinephrine
GSM838502	qseC mutant grown in DMEM to OD1.0	qseC grown OD1 DMEM
GSM838503	qseC mutant grown in DMEM with epinephrine to OD1.0	qseC grown OD1 DMEM with epinephrine
GSM838504	qseE mutant grown in DMEM to OD1.0	qseE grown OD1 DMEM
GSM838505	qseE mutant grown in DMEM with epinephrine to OD1.0	qseE grown OD1 DMEM with epinephrine
GSM840545	K12 Δ(yjjP-yjjQ-bglJ) + pBglJ	K12 Δ(yjjP-yjjQ-bglJ) + pBglJ, biological replicate 1
GSM840546	K12 Δ(yjjP-yjjQ-bglJ) + pBglJ	K12 Δ(yjjP-yjjQ-bglJ) + pBglJ, biological replicate 2
GSM840547	K12Δ(yjjP-yjjQ-bglJ) + pBglJ	K12Δ(yjjP-yjjQ-bglJ) + pBglJ, biological replicate 3
GSM840548	K12 Δ(yjjP-yjjQ-bglJ) + pBglJ	K12 Δ(yjjP-yjjQ-bglJ) + pBglJ, biological replicate 4
GSM840549	K12 Δ(yjjP-yjjQ-bglJ) + ctrl	K12 Δ(yjjP-yjjQ-bglJ) + ctrl, biological replicate 1
GSM840550	K12 Δ(yjjP-yjjQ-bglJ) + ctrl	K12 Δ(yjjP-yjjQ-bglJ) + ctrl, biological replicate 2
GSM840551	K12 Δ(yjjP-yjjQ-bglJ) + ctrl	K12 Δ(yjjP-yjjQ-bglJ) + ctrl, biological replicate 3
GSM840552	K12 Δ(yjjP-yjjQ-bglJ) + ctrl	K12 Δ(yjjP-yjjQ-bglJ) + ctrl, biological replicate 4
GSM840553	K12 Δ(yjjP-yjjQ-bglJ) + pLeuO	K12 Δ(yjjP-yjjQ-bglJ) + pLeuO, biological replicate 1
GSM840554	K12 Δ(yjjP-yjjQ-bglJ) + pLeuO	K12 Δ(yjjP-yjjQ-bglJ) + pLeuO, biological replicate 2
GSM840555	K12 Δ(yjjP-yjjQ-bglJ) + pLeuO	K12 Δ(yjjP-yjjQ-bglJ) + pLeuO, biological replicate 3
GSM840556	K12 Δ(yjjP-yjjQ-bglJ) + pLeuO	K12 Δ(yjjP-yjjQ-bglJ) + pLeuO, biological replicate 4
GSM840557	K12 Δ(yjjP-yjjQ-bglJ) ΔrcsB + pBglJ	K12 Δ(yjjP-yjjQ-bglJ) ΔrcsB + pBglJ, biological replicate 1
GSM840558	K12 Δ(yjjP-yjjQ-bglJ) ΔrcsB + pBglJ	K12 Δ(yjjP-yjjQ-bglJ) ΔrcsB + pBglJ, biological replicate 2
GSM840559	K12 Δ(yjjP-yjjQ-bglJ) ΔrcsB + pBglJ	K12 Δ(yjjP-yjjQ-bglJ) ΔrcsB + pBglJ, biological replicate 3
GSM840560	K12 Δ(yjjP-yjjQ-bglJ) ΔrcsB + pBglJ	K12 Δ(yjjP-yjjQ-bglJ) ΔrcsB + pBglJ, biological replicate 4
GSM840561	K12 Δ(yjjP-yjjQ-bglJ) ΔrcsB + ctrl	K12 Δ(yjjP-yjjQ-bglJ) ΔrcsB + ctrl, biological replicate 1
GSM840562	K12 Δ(yjjP-yjjQ-bglJ) ΔrcsB + ctrl	K12 Δ(yjjP-yjjQ-bglJ) ΔrcsB + ctrl, biological replicate 2
GSM840563	K12 Δ(yjjP-yjjQ-bglJ) ΔrcsB + ctrl	K12 Δ(yjjP-yjjQ-bglJ) ΔrcsB + ctrl, biological replicate 3
GSM840564	K12 Δ(yjjP-yjjQ-bglJ) ΔrcsB + ctrl	K12 Δ(yjjP-yjjQ-bglJ) ΔrcsB + ctrl, biological replicate 4
GSM840565	K12 Δ(yjjP-yjjQ-bglJ) ΔleuO + pBglJ	K12 Δ(yjjP-yjjQ-bglJ) ΔleuO + pBglJ, biological replicate 1
GSM840566	K12 Δ(yjjP-yjjQ-bglJ) ΔleuO + pBglJ	K12 Δ(yjjP-yjjQ-bglJ) ΔleuO + pBglJ, biological replicate 2
GSM840567	K12 Δ(yjjP-yjjQ-bglJ) ΔleuO + pBglJ	K12 Δ(yjjP-yjjQ-bglJ) ΔleuO + pBglJ, biological replicate 3
GSM840568	K12 Δ(yjjP-yjjQ-bglJ) ΔleuO + pBglJ	K12 Δ(yjjP-yjjQ-bglJ) ΔleuO + pBglJ, biological replicate 4
GSM840569	K12 Δ(yjjP-yjjQ-bglJ) ΔleuO + ctrl	K12 Δ(yjjP-yjjQ-bglJ) ΔleuO + ctrl, biological replicate 1
GSM840570	K12 Δ(yjjP-yjjQ-bglJ) ΔleuO + ctrl	K12 Δ(yjjP-yjjQ-bglJ) ΔleuO + ctrl, biological replicate 2
GSM840571	K12 Δ(yjjP-yjjQ-bglJ) ΔleuO + ctrl	K12 Δ(yjjP-yjjQ-bglJ) ΔleuO + ctrl, biological replicate 3
GSM840572	K12 Δ(yjjP-yjjQ-bglJ) ΔleuO + ctrl	K12 Δ(yjjP-yjjQ-bglJ) ΔleuO + ctrl, biological replicate 4
GSM840577	Channel 1	BW25113 delta rpoS persisters T5 hrs ampicillin
GSM840609	Channel 1	BW25113 wild-type H202 pre-treatment 5 h ampicillin persisters
GSM840625	Channel 1	BW25113 wild-type stationary phase OD 3.0
GSM840952	Wild type	E. coli strain 86-24
GSM840953	Wild type + ethanolamine	E. coli strain 86-24 grown with ethanolamine
GSM846190	E.coli, grown in LB to0.8OD	control, biological rep1 C1
GSM846191	E.coli, grown in LB to0.8OD	control, biological rep1 C2
GSM846192	E.coli, grown in LB to0.8OD	control, biological rep1 C3
GSM846193	E.coli, grown in LB to0.8OD	control, biological rep2 C4
GSM846194	E.coli, grown in LB to0.8OD	control, biological rep2 C5
GSM846195	E.coli, grown in LB to0.8OD	control, biological rep2 C6
GSM846196	E.coli, grown in LB+ glycerol to0.8OD	Experimental,biological rep1 G1
GSM846197	E.coli, grown in LB+ glycerol to0.8OD	Experimental,biological rep1 G2
GSM846198	E.coli, grown in LB+ glycerol to0.8OD	Experimental,biological rep1 G3
GSM846199	E.coli, grown in LB+ glycerol to0.8OD	Experimental,biological rep2 G4
GSM846200	E.coli, grown in LB+ glycerol to0.8OD	Experimental,biological rep2 G5
GSM846201	E.coli, grown in LB+ glycerol to0.8OD	Experimental,biological rep2 G6
GSM852195	E. coli K12 MG1655_2g/L propylene glycol	propylene glycol 1
GSM852196	E. coli K12 MG1655_2g/L propylene glycol	propylene glycol 2
GSM852197	E. coli K12 MG1655_2g/L propylene glycol	propylene glycol 3
GSM852198	E. coli K12 MG1655_2g/L glycerol	glycerol 1
GSM852199	E. coli K12 MG1655_2g/L glycerol	glycerol 2
GSM852200	E. coli K12 MG1655_2g/L glycerol	glycerol 3
GSM859955	E.coli 86-24 fusK mutant	Gene regulation by FusK (HK) in Enterohemorrhagic E.coli 86-24
GSM859956	E.coli 86-24 fusR mutant	Gene regulation by FusR (RR) in Enterohemorrhagic E.coli 86-24
GSM862032	Cells in log phase under furfural stress	Furfural-tolerant IrrE mutant F1-37, biological rep1
GSM862033	Cells in log phase under furfural stress	Furfural-tolerant IrrE mutant F1-37, biological rep2
GSM862034	Cells in log phase under furfural stress	Furfural-tolerant IrrE mutant F1-37, biological rep3
GSM862035	Cells in log phase under furfural stress	Wild-type IrrE, biological rep1
GSM862036	Cells in log phase under furfural stress	Wild-type IrrE, biological rep2
GSM862037	Cells in log phase under furfural stress	Wild-type IrrE, biological rep3
GSM866995	E_coli_treated_sinusoidal_cont_8min_rep1	E_coli_treated_sinusoidal_cont_8min_rep1
GSM866996	E_coli_treated_sinusoidal_cont_8min_rep2	E_coli_treated_sinusoidal_cont_8min_rep2
GSM866997	E_coli_treated_sinusoidal_cont_8min_rep3	E_coli_treated_sinusoidal_cont_8min_rep3
GSM866998	E_coli_sham_sinusoidal_cont_8min_rep1	E_coli_sham_sinusoidal_cont_8min_rep1
GSM866999	E_coli_sham_sinusoidal_cont_8min_rep2	E_coli_sham_sinusoidal_cont_8min_rep2
GSM867000	E_coli_sham_sinusoidal_cont_8min_rep3	E_coli_sham_sinusoidal_cont_8min_rep3
GSM867001	E_coli_treated_sinusoidal_cont_2.5h_rep1	E_coli_treated_sinusoidal_cont_2.5h_rep1
GSM867002	E_coli_treated_sinusoidal_cont_2.5h_rep2	E_coli_treated_sinusoidal_cont_2.5h_rep2
GSM867003	E_coli_treated_sinusoidal_cont_2.5h_rep3	E_coli_treated_sinusoidal_cont_2.5h_rep3
GSM867004	E_coli_sham_sinusoidal_cont_2.5h_rep1	E_coli_sham_sinusoidal_cont_2.5h_rep1
GSM867005	E_coli_sham_sinusoidal_cont_2.5h_rep2	E_coli_sham_sinusoidal_cont_2.5h_rep2
GSM867006	E_coli_sham_sinusoidal_cont_2.5h_rep3	E_coli_sham_sinusoidal_cont_2.5h_rep3
GSM867007	E_coli_treated_sinusoidal_cont_15h_rep1	E_coli_treated_sinusoidal_cont_15h_rep1
GSM867008	E_coli_treated_sinusoidal_cont_15h_rep2	E_coli_treated_sinusoidal_cont_15h_rep2
GSM867009	E_coli_treated_sinusoidal_cont_15h_rep3	E_coli_treated_sinusoidal_cont_15h_rep3
GSM867010	E_coli_sham_sinusoidal_cont_15h_rep1	E_coli_sham_sinusoidal_cont_15h_rep1
GSM867011	E_coli_sham_sinusoidal_cont_15h_rep2	E_coli_sham_sinusoidal_cont_15h_rep2
GSM867012	E_coli_sham_sinusoidal_cont_15h_rep3	E_coli_sham_sinusoidal_cont_15h_rep3
GSM867013	E_coli_treated_sinusoidal_interm_2.5h_rep1	E_coli_treated_sinusoidal_interm_2.5h_rep1
GSM867014	E_coli_treated_sinusoidal_interm_2.5h_rep2	E_coli_treated_sinusoidal_interm_2.5h_rep2
GSM867015	E_coli_treated_sinusoidal_interm_2.5h_rep3	E_coli_treated_sinusoidal_interm_2.5h_rep3
GSM867016	E_coli_sham_sinusoidal_interm_2.5h_rep1	E_coli_sham_sinusoidal_interm_2.5h_rep1
GSM867017	E_coli_sham_sinusoidal_interm_2.5h_rep2	E_coli_sham_sinusoidal_interm_2.5h_rep2
GSM867018	E_coli_sham_sinusoidal_interm_2.5h_rep3	E_coli_sham_sinusoidal_interm_2.5h_rep3
GSM867019	E_coli_treated_sinusoidal_interm_15h_rep1	E_coli_treated_sinusoidal_interm_15h_rep1
GSM867020	E_coli_treated_sinusoidal_interm_15h_rep2	E_coli_treated_sinusoidal_interm_15h_rep2
GSM867021	E_coli_treated_sinusoidal_interm_15h_rep3	E_coli_treated_sinusoidal_interm_15h_rep3
GSM867022	E_coli_sham_sinusoidal_interm_15h_rep1	E_coli_sham_sinusoidal_interm_15h_rep1
GSM867023	E_coli_sham_sinusoidal_interm_15h_rep2	E_coli_sham_sinusoidal_interm_15h_rep2
GSM867024	E_coli_sham_sinusoidal_interm_15h_rep3	E_coli_sham_sinusoidal_interm_15h_rep3
GSM867025	E_coli_treated_powerline_interm_8min_rep1	E_coli_treated_powerline_interm_8min_rep1
GSM867026	E_coli_treated_powerline_interm_8min_rep2	E_coli_treated_powerline_interm_8min_rep2
GSM867027	E_coli_treated_powerline_interm_8min_rep3	E_coli_treated_powerline_interm_8min_rep3
GSM867028	E_coli_sham_powerline_interm_8min_rep1	E_coli_sham_powerline_interm_8min_rep1
GSM867029	E_coli_sham_powerline_interm_8min_rep2	E_coli_sham_powerline_interm_8min_rep2
GSM867030	E_coli_sham_powerline_interm_8min_rep3	E_coli_sham_powerline_interm_8min_rep3
GSM867031	E_coli_treated_powerline_interm_2.5h_rep1	E_coli_treated_powerline_interm_2.5h_rep1
GSM867032	E_coli_treated_powerline_interm_2.5h_rep2	E_coli_treated_powerline_interm_2.5h_rep2
GSM867033	E_coli_treated_powerline_interm_2.5h_rep3	E_coli_treated_powerline_interm_2.5h_rep3
GSM867034	E_coli_sham_powerline_interm_2.5h_rep1	E_coli_sham_powerline_interm_2.5h_rep1
GSM867035	E_coli_sham_powerline_interm_2.5h_rep2	E_coli_sham_powerline_interm_2.5h_rep2
GSM867036	E_coli_sham_powerline_interm_2.5h_rep3	E_coli_sham_powerline_interm_2.5h_rep3
GSM867037	E_coli_treated_powerline_interm_15h_rep1	E_coli_treated_powerline_interm_15h_rep1
GSM867038	E_coli_treated_powerline_interm_15h_rep2	E_coli_treated_powerline_interm_15h_rep2
GSM867039	E_coli_treated_powerline_interm_15h_rep3	E_coli_treated_powerline_interm_15h_rep3
GSM867040	E_coli_sham_powerline_interm_15h_rep1	E_coli_sham_powerline_interm_15h_rep1
GSM867041	E_coli_sham_powerline_interm_15h_rep2	E_coli_sham_powerline_interm_15h_rep2
GSM867042	E_coli_sham_powerline_interm_15h_rep3	E_coli_sham_powerline_interm_15h_rep3
GSM867043	E_coli_negativ_control_left_chamber_rep1	E_coli_negativ_control_left_chamber_rep1
GSM867044	E_coli_negativ_control_left_chamber_rep2	E_coli_negativ_control_left_chamber_rep2
GSM867045	E_coli_negativ_control_left_chamber_rep3	E_coli_negativ_control_left_chamber_rep3
GSM867046	E_coli_negativ_control_right_chamber_rep1	E_coli_negativ_control_right_chamber_rep1
GSM867047	E_coli_negativ_control_right_chamber_rep2	E_coli_negativ_control_right_chamber_rep2
GSM867048	E_coli_negativ_control_right_chamber_rep3	E_coli_negativ_control_right_chamber_rep3
GSM867049	E_coli_response_control_water_added_rep1	E_coli_response_control_water_added_rep1
GSM867050	E_coli_response_control_water_added_rep2	E_coli_response_control_water_added_rep2
GSM867051	E_coli_response_control_water_added_rep3	E_coli_response_control_water_added_rep3
GSM867052	E_coli_response_control_1mM_H2O2_added_rep1	E_coli_response_control_1mM_H2O2_added_rep1
GSM867053	E_coli_response_control_1mM_H2O2_added_rep2	E_coli_response_control_1mM_H2O2_added_rep2
GSM867054	E_coli_response_control_1mM_H2O2_added_rep3	E_coli_response_control_1mM_H2O2_added_rep3
GSM875069	E. coli UTI89 in YESCA broth	UTI89_Y_1
GSM875070	E. coli UTI89 in YESCA broth containing 4% DMSO	UTI89_Y_4D
GSM875071	E. coli UTI89 in YESCA broth	UTI89_Y_2
GSM875072	E. coli UTI89 in YESCA broth containing 2% EtOH	UTI89_Y_2E_2
GSM900972	Planktonic cells	BW25113-pCA24N with 1 mM IPTG for 90min at 37C
GSM900973	Planktonic cells	BW25113-pCA24N-ghoS with 1 mM IPTG for 90min at 37C
GSM909095	Escherichia coli MG1655 after 30 min incubation	control sample at 30 min, biological rep1
GSM909096	Escherichia coli MG1655 after 30 min incubation following colicin M treatment	treated sample at 30 min, biological rep1
GSM909097	Escherichia coli MG1655 after 60 min incubation	control sample at 60 min, biological rep1
GSM909098	Escherichia coli MG1655 after 60 min incubation following colicin M treatment	treated sample at 60 min, biological rep1
GSM909099	Escherichia coli MG1655 after 30 min incubation	control sample at 30 min, biological rep2
GSM909100	Escherichia coli MG1655 after 30 min incubation following colicin M treatment	treated sample at 30 min, biological rep2
GSM909101	Escherichia coli MG1655 after 60 min incubation	control sample at 60 min, biological rep2
GSM909102	Escherichia coli MG1655 after 60 min incubation following colicin M treatment	treated sample at 60 min, biological rep2
GSM910630	Escherichia coli O157:H7 cultivated for 6 hours in the caecal content of rats	Germfree rat's caecum, biological rep1
GSM910631	Escherichia coli O157:H7 cultivated for 6 hours in the caecal content of rats	Germfree rat's caecum, biological rep2
GSM910632	Escherichia coli O157:H7 cultivated for 6 hours in the caecal content of rats	Germfree rat's caecum, biological rep3
GSM910633	Escherichia coli O157:H7 cultivated for 6 hours in the caecal content of rats	Human intestinal microbiota associated rat's caecum, biological rep1
GSM910634	Escherichia coli O157:H7 cultivated for 6 hours in the caecal content of rats	Human intestinal microbiota associated rat's caecum, biological rep2
GSM910635	Escherichia coli O157:H7 cultivated for 6 hours in the caecal content of rats	Human intestinal microbiota associated rat's caecum, biological rep3
GSM928165	E. coli K12 strain DH10B harboring NFI, nitrogen fixation	EN-01 1, biological rep1
GSM928166	E. coli K12 strain DH10B harboring NFI, nitrogen fixation	EN-01 2, biological rep2
GSM928167	E. coli K12 strain DH10B harboring NFI, nitrogen fixation	EN-01 3, biological rep3
GSM928168	E. coli K12 strain DH10B harboring NFI, nitrogen excess	EN-01 ammonium 1, biological rep1
GSM928169	E. coli K12 strain DH10B harboring NFI, nitrogen excess	EN-01 ammonium 2, biological rep2
GSM928170	E. coli K12 strain DH10B harboring NFI, nitrogen excess	EN-01 ammonium 3, biological rep3
GSM966306	Mutant E. coli O157 treated with 6 ug/ml triclosan for 30 min, biological rep 1	Triclosan tolerant mutant triclosan treated biological rep 1
GSM966307	Mutant E. coli O157 treated with 6 ug/ml triclosan for 30 min, biological rep 2	Triclosan tolerant mutant triclosan treated biological rep 2
GSM966308	Mutant E. coli O157 treated with 6 ug/ml triclosan for 30 min, biological rep 3	Triclosan tolerant mutant triclosan treated biological rep 3
GSM966309	Mutant E. coli O157 untreated, biological rep 1	Triclosan tolerant mutant untreated biological rep 1
GSM966310	Mutant E. coli O157 untreated, biological rep 2	Triclosan tolerant mutant untreated biological rep 2
GSM966311	Mutant E. coli O157 untreated, biological rep 3	Triclosan tolerant mutant untreated biological rep 3
GSM966312	Wildtype E. coli O157 treated with 6 ug/ml triclosan for 30 min, biological rep 1	Wildtype triclosan treated biological rep 1
GSM966313	Wildtype E. coli O157 treated with 6 ug/ml triclosan for 30 min, biological rep 2	Wildtype triclosan treated biological rep 2
GSM966314	Wildtype E. coli O157 treated with 6 ug/ml triclosan for 30 min, biological rep 3	Wildtype triclosan treated biological rep 3
GSM966315	Wildtype E. coli O157 untreated, biological rep 1	Wildtype untreated biological rep 1
GSM966316	Wildtype E. coli O157 untreated, biological rep 2	Wildtype untreated biological rep 2
GSM966317	Wildtype E. coli O157 untreated, biological rep 3	Wildtype untreated biological rep 3
GSM972951	Escherichia coli treated with 1%DMSO	Solvent control, biological rep1
GSM972952	Escherichia coli treated with 1%DMSO	Solvent control, biological rep2
GSM972953	Escherichia coli treated with 1%DMSO	Solvent control, biological rep3
GSM972954	Escherichia coli treated with 0.5MIC of cyadox	0.5MIC of CYA, biological rep1
GSM972955	Escherichia coli treated with 0.5MIC of cyadox	0.5MIC of CYA, biological rep2
GSM972956	Escherichia coli treated with 0.5MIC of cyadox	0.5MIC of CYA, biological rep3
GSM972957	Escherichia coli treated with MBC of cyadox	MBC of CYA, biological rep1
GSM972958	Escherichia coli treated with MBC of cyadox	MBC of CYA, biological rep2
GSM972959	Escherichia coli treated with MBC of cyadox	MBC of CYA, biological rep3
GSM972960	Escherichia coli treated with MIC of olaquindox	MIC of OLA, biological rep1
GSM972961	Escherichia coli treated with MIC of olaquindox	MIC of OLA, biological rep2
GSM972962	Escherichia coli treated with MIC of olaquindox	MIC of OLA, biological rep3
GSM972963	Escherichia coli treated with MBC of olaquindox	MBC of OLA, biological rep1
GSM972964	Escherichia coli treated with MBC of olaquindox	MBC of OLA, biological rep2
GSM972965	Escherichia coli treated with MBC of olaquindox	MBC of OLA, biological rep3
GSM998832	E.coli culture that reached 0.8OD under normal gravity conditions	control-biological replicate1
GSM998833	E.coli culture that reached 0.8OD under normal gravity conditions	control-biological replicate2
GSM998834	E.coli culture that reached 0.8OD under normal gravity conditions	control-biological replicate3
GSM998835	E.coli culture that reached 0.8OD under normal gravity conditions	control-biological replicate4
GSM998836	E.coli culture that reached 0.8OD under Microgravity conditions	Test-biological replicate1
GSM998837	E.coli culture that reached 0.8OD under Microgravity conditions	Test-biological replicate2
GSM998838	E.coli culture that reached 0.8OD under Microgravity conditions	Test-biological replicate3
GSM998839	E.coli culture that reached 0.8OD under Microgravity conditions	Test-biological replicate4
GSM999245	E. coli O157:H7 control, sampled at 2h of treatment	E. coli O157:H7 at 2 h control biological rep1
GSM999246	E. coli O157:H7 control, sampled at 2h of treatment	E. coli O157:H7 at 2 h control biological rep2
GSM999247	E. coli O157:H7 control, sampled at 4h of treatment	E. coli O157:H7 at 4 h control biological rep1
GSM999248	E. coli O157:H7 control, sampled at 4h of treatment	E. coli O157:H7 at 4 h control biological rep2
GSM999249	E. coli O157:H7 treated with 200 mg/l cinnamaldehyde, sampled at 2h of treatment	E. coli O157:H7 at 2 h cinnamaldehyde treatment biological rep1
GSM999250	E. coli O157:H7 treated with 200 mg/l cinnamaldehyde, sampled at 2h of treatment	E. coli O157:H7 at 2 h cinnamaldehyde treatment biological rep2
GSM999251	E. coli O157:H7 treated with 200 mg/l cinnamaldehyde, sampled at 4h of treatment	E. coli O157:H7 at 4 h cinnamaldehyde treatment biological rep1
GSM999252	E. coli O157:H7 treated with 200 mg/l cinnamaldehyde, sampled at 4h of treatment	E. coli O157:H7 at 4 h cinnamaldehyde treatment biological rep2
GSM1060527	wild type	wild type strain grown to OD600 0,5
GSM1060528	wild type epi	wild type strain grown to OD600 0,5 plus epinephrine
GSM1060529	delta qseC	delta qseC strain grown to OD600 0,5
GSM1060530	delta qseC epi	delta qseC strain grown to OD600 0,5 plus epinephrine
GSM1067693	kdpE cra mutant grown in DMEM to OD1.0	kdpe cra grown OD1 DMEM
GSM1067694	wt grown in DMEM to OD1.0	wt grown OD1 DMEM
GSM1067695	cra mutant grown in DMEM to OD1.0	cra grown OD1 DMEM
GSM1080843	E. coli_control_30 min	Control-1, biological rep1
GSM1080844	E. coli_control_30 min	Control-2, biological rep2
GSM1080845	E. coli_control_30 min	Control-3, biological rep3
GSM1080846	E. coli_PGRP_30 min	PGRP-1, biological rep1
GSM1080847	E. coli_PGRP_30 min	PGRP-2, biological rep2
GSM1080848	E. coli_PGRP_30 min	PGRP-3, biological rep3
GSM1080849	E. coli_gentamicin_30 min	Gentamicin-1, biological rep1
GSM1080850	E. coli_gentamicin_30 min	Gentamicin-2, biological rep2
GSM1080851	E. coli_gentamicin_30 min	Gentamicin-3, biological rep3
GSM1080852	E. coli_CCCP_15 min	CCCP-1, biological rep1
GSM1080853	E. coli_CCCP_15 min	CCCP-2, biological rep2
GSM1080854	E. coli_CCCP_15 min	CCCP-3, biological rep3
GSM1081694	RP437 persisters treated with BF8 at 5 μg/mL for 1 hour	F1
GSM1081695	furanone-free control	C1
GSM1081696	RP437 persisters treated with BF8 at 5 μg/mL for 1 hour	F2
GSM1081697	furanone-free control	C2
GSM1133373	E. coli K12 strain JM109 harboring pUC18	pUC18_1, biological rep1
GSM1133374	E. coli K12 strain JM109 harboring pUC18	pUC18_2, biological rep2
GSM1133375	E. coli K12 strain JM109 harboring pUC18	pUC18_3, biological rep3
GSM1133376	E. coli K12 strain JM109 harboring pUCA1501	pUCA1501_1, biological rep1
GSM1133377	E. coli K12 strain JM109 harboring pUCA1501	pUCA1501_2, biological rep2
GSM1133378	E. coli K12 strain JM109 harboring pUCA1501	pUCA1501_3, biological rep3
GSM1149180	EHEC grown anaerobically in DMEM to mid-log	EHEC only_mid-log_DMEM_anaerobic
GSM1149181	EHEC grown with B. theta anaerobically in DMEM to mid-log	EHEC+ B theta_mid-log_DMEM_anaerobic
GSM1149310	overexpression of empty vector (pCA24N)	BW25113-pCA24N
GSM1149311	overexpression of dosP (pCA24N_dosP)	BW25113-pCA24N_dosP
GSM1165034	APEC strain SCI-07	APEC strain SCI-07
GSM1165035	APEC strain O08	APEC strain O08
GSM1184421	Escherichia coli	hyb16602
GSM1184422	Escherichia coli	hyb16603
GSM1184423	Escherichia coli	hyb16604
GSM1184424	Escherichia coli	hyb16605
GSM1198176	Escherichia coli O157:H7 EDL933	Escherichia coli O157:H7 EDL933, control
GSM1198177	Escherichia coli O157:H7 EDL933	Escherichia coli O157:H7 EDL933, 0.005 mg/ml of Ginkgolic acid
GSM1209658	PA	PA-1A
GSM1209659	PA	PA-1B
GSM1209660	PA	PA-1C
GSM1209661	PS-20min	PS-20min-2A
GSM1209662	PS-20min	PS-20min-2B
GSM1209663	PS-20min	PS-20min-2C
GSM1209664	PS-40min	PS-40min-3A
GSM1209665	PS-40min	PS-40min-3B
GSM1209666	PS-40min	PS-40min-3C
GSM1209667	PS-60min	PS-60min-4A
GSM1209668	PS-60min	PS-60min-4B
GSM1209669	PS-60min	PS-60min-4C
GSM1220771	EDL933 WT grown in MOPS Pi+ OD 0.6	EDL933 WT grown in MOPS high Pi rep1
GSM1220772	EDL933 WT grown in MOPS Pi+ OD 0.6	EDL933 WT grown in MOPS high Pi rep2
GSM1220773	EDL933 WT grown in MOPS Pi+ OD 0.6	EDL933 WT grown in MOPS high Pi rep3
GSM1220774	EDL933 WT grown in MOPS Pi- OD 0.55	EDL933 WT grown in MOPS low Pi rep1
GSM1220775	EDL933 WT grown in MOPS Pi- OD 0.55	EDL933 WT grown in MOPS low Pi rep2
GSM1220776	EDL933 WT grown in MOPS Pi- OD 0.55	EDL933 WT grown in MOPS low Pi rep3
GSM1220777	EDL933 ΔphoB grown in MOPS Pi- OD 0.55	EDL933 ΔphoB grown in MOPS low Pi rep1
GSM1220778	EDL933 ΔphoB grown in MOPS Pi- OD 0.56	EDL933 ΔphoB grown in MOPS low Pi rep2
GSM1220779	EDL933 ΔphoB grown in MOPS Pi- OD 0.57	EDL933 ΔphoB grown in MOPS low Pi rep3
GSM1230521	E.coli, grown in LB to 0.8OD	LB, biological rep1
GSM1230522	E.coli, grown in LB to 0.8OD	LB, biological rep2
GSM1230523	E.coli, grown in LB to 0.8OD	LB, biological rep3
GSM1230524	E.coli, grown in LB+glycerol to 0.8OD	LB+glycerol, biological rep1
GSM1230525	E.coli, grown in LB+glycerol to 0.8OD	LB+glycerol, biological rep2
GSM1230526	E.coli, grown in LB+glycerol to 0.8OD	LB+glycerol, biological rep3
GSM1248714	E.coli MG1655 cells grown at 0.1/hr growth rate in Minimum media supplemented with glucose, galactose, glycerol, lactate and maltose (0.04% w/v)	metabolism network gene expression profile of mixed substrate culture at growth rate of 0.1 / hr
GSM1248715	E.coli MG1655 cells grown at 0.2/hr growth rate in Minimum media supplemented with glucose, galactose, glycerol, lactate and maltose (0.04% w/v)	metabolism network gene expression profile of mixed substrate culture at growth rate of 0.2 / hr
GSM1248716	E.coli MG1655 cells grown at 0.3/hr growth rate in Minimum media supplemented with glucose, galactose, glycerol, lactate and maltose (0.04% w/v)	metabolism network gene expression profile of mixed substrate culture at growth rate of 0.3 / hr
GSM1248717	E.coli MG1655 cells grown at 0.5/hr growth rate in Minimum media supplemented with glucose, galactose, glycerol, lactate and maltose (0.04% w/v)	metabolism network gene expression profile of mixed substrate culture at growth rate of 0.4 / hr
GSM1248718	E.coli MG1655 cells grown at 0.6/hr growth rate in Minimum media supplemented with glucose, galactose, glycerol, lactate and maltose (0.04% w/v)	metabolism network gene expression profile of mixed substrate culture at growth rate of 0.6 / hr
GSM1248719	E.coli MG1655 cells grown at 0.7/hr growth rate in Minimum media supplemented with glucose, galactose, glycerol, lactate and maltose (0.04% w/v)	metabolism network gene expression profile of mixed substrate culture at growth rate of 0.7 / hr
GSM1282907	E. coli MG1655-MOPS+2%Dextrose	E. coli MG1655-control-1
GSM1282908	E. coli MG1655-MOPS+2%Dextrose	E. coli MG1655-control-2
GSM1282909	E. coli MG1655-MOPS+2%Dextrose	E. coli MG1655-control-3
GSM1282910	E. coli MG1655-MOPS+2%Dextrose+10mM C8	E. coli MG1655-C8-1
GSM1282911	E. coli MG1655-MOPS+2%Dextrose+10mM C8	E. coli MG1655-C8-3
GSM1311346	overexpression of empty vector (pCA24N)	BW25113-pCA24N LB 90 min 1 mM IPTG
GSM1311347	overexpression of arT (pCA24N_arT)	BW25113-pCA24N_arT LB 90 min 1 mM IPTG
GSM1334746	affyexp_delta-arcA_glucose_NH4Cl_NO3	affyexp_delta-arcA_glucose_NH4Cl_NO3_1.CEL
GSM1334747	affyexp_delta-arcA_glucose_NH4Cl_NO3	affyexp_delta-arcA_glucose_NH4Cl_NO3_2.CEL
GSM1334748	affyexp_delta-arcA_glucose_NH4Cl_NO3	affyexp_delta-arcA_glucose_NH4Cl_NO3_3.CEL
GSM1334749	affyexp_delta-fnr_glucose_NH4Cl_NO3	affyexp_delta-fnr_glucose_NH4Cl_NO3_1.CEL
GSM1334750	affyexp_delta-fnr_glucose_NH4Cl_NO3	affyexp_delta-fnr_glucose_NH4Cl_NO3_2.CEL
GSM1334751	affyexp_delta-fnr_glucose_NH4Cl_NO3	affyexp_delta-fnr_glucose_NH4Cl_NO3_3.CEL
GSM1334752	affyexp_wt_glucose_NH4Cl_NO3	affyexp_wt_glucose_NH4Cl_NO3_1.CEL
GSM1334753	affyexp_wt_glucose_NH4Cl_NO3	affyexp_wt_glucose_NH4Cl_NO3_2.CEL
GSM1334754	affyexp_wt_glucose_NH4Cl_NO3	affyexp_wt_glucose_NH4Cl_NO3_3.CEL
GSM1341344	Non-treated, WT control at T0, biological rep 1	WT_noCPR_1
GSM1341345	Non-treated, WT control at T0, biological rep 2	WT_noCPR_2
GSM1341346	Cirpofloxacin treated WT sample at T1h, biological rep 1	WT_CPR_1
GSM1341347	Cirpofloxacin treated WT sample at T1h, biological rep 2	WT_CPR_2
GSM1341348	Non-treated, fur mutant sample at T0, biological rep 1	FUR_noCPR_1
GSM1341349	Non-treated, fur mutant sample at T0, biological rep 2	FUR_noCPR_2
GSM1341350	Cirpofloxacin treated fur mutant sample at T1h, biological rep 1	FUR_CPR_1
GSM1341351	Cirpofloxacin treated fur mutant sample at T1h, biological rep 2	FUR_CPR_2
GSM1356325	Untreated WT E coli cells at 60 min	WT Untreated 1
GSM1356326	Untreated WT E coli cells at 60 min	WT Untreated 2
GSM1356327	Untreated WT E coli cells at 60 min	WT Untreated 3
GSM1356328	Amp treated WT E coli cells at 60 min	WT Amp 1
GSM1356329	Amp treated WT E coli cells at 60 min	WT Amp 2
GSM1356330	Amp treated WT E coli cells at 60 min	WT Amp 3
GSM1356331	Gent treated WT E coli cells at 60 min	WT Gent 1
GSM1356332	Gent treated WT E coli cells at 60 min	WT Gent 2
GSM1356333	Gent treated WT E coli cells at 60 min	WT Gent 3
GSM1356334	Kan treated WT E coli cells at 60 min	WT Kan 1
GSM1356335	Kan treated WT E coli cells at 60 min	WT Kan 2
GSM1356336	Kan treated WT E coli cells at 60 min	WT Kan 3
GSM1356337	Nor treated WT E coli cells at 60 min	WT Nor 1
GSM1356338	Nor treated WT E coli cells at 60 min	WT Nor 2
GSM1356339	Nor treated WT E coli cells at 60 min	WT Nor 3
GSM1356340	H2O2 treated WT E coli cells at 60 min	WT H2O2 1
GSM1356341	H2O2 treated WT E coli cells at 60 min	WT H2O2 2
GSM1356342	H2O2 treated WT E coli cells at 60 min	WT H2O2 3
GSM1356343	Untreated <U+2206>fur E coli cells at 60 min	Fur KO Untreated 1
GSM1356344	Untreated <U+2206>fur E coli cells at 60 min	Fur KO Untreated 2
GSM1356345	Untreated <U+2206>fur E coli cells at 60 min	Fur KO Untreated 3
GSM1356346	Gent treated <U+2206>fur E coli cells at 60 min	Fur KO Gent 1
GSM1356347	Gent treated <U+2206>fur E coli cells at 60 min	Fur KO Gent 2
GSM1356348	Gent treated <U+2206>fur E coli cells at 60 min	Fur KO Gent 3
GSM1356349	Untreated Hpx- E coli cells at 60 min	Hpx KO Untreated 1
GSM1356350	Untreated Hpx- E coli cells at 60 min	Hpx KO Untreated 2
GSM1356351	Untreated Hpx- E coli cells at 60 min	Hpx KO Untreated 3
GSM1357716	E. coli strain MC4100relA+ in mid log phase incubated at 37oC for 4 hours without treatment.	WT 0 μg/ml NA rep1
GSM1357717	E. coli strain MC4100relA+ in mid log phase incubated at 37oC for 4 hours without treatment.	WT 0 μg/ml NA rep2
GSM1357718	E. coli strain MC4100relA+ in mid log phase incubated at 37oC for 4 hours with 100 μg/ml NA	WT 100 μg/ml NA rep1
GSM1357719	E. coli strain MC4100relA+ in mid log phase incubated at 37oC for 4 hours with 100 μg/ml NA	WT 100 μg/ml NA rep2
GSM1357720	E. coli strain MC4100relA+ in mid log phase incubated at 37oC for 4 hours with 100 μg/ml NA	WT 100 μg/ml NA rep3
GSM1357721	E. coli strain MC4100relA+ in mid log phase incubated at 37oC for 4 hours with 10 μg/ml NA	WT 10 μg/ml NA rep1
GSM1357722	E. coli strain MC4100relA+ in mid log phase incubated at 37oC for 4 hours with 10 μg/ml NA	WT 10 μg/ml NA rep2
GSM1357723	E. coli strain MC4100relA+ <U+2206>mazEF in mid log phase incubated at 37oC for 4 hours without treatment	<U+2206>mazEF 0 μg/ml NA rep1
GSM1357724	E. coli strain MC4100relA+ <U+2206>mazEF in mid log phase incubated at 37oC for 4 hours without treatment	<U+2206>mazEF 0 μg/ml NA rep2
GSM1357725	E. coli strain MC4100relA+ <U+2206>mazEF in mid log phase incubated at 37oC for 4 hours with 100 μg/ml NA	<U+2206>mazEF 100 μg/ml NA rep1
GSM1357726	E. coli strain MC4100relA+ <U+2206>mazEF in mid log phase incubated at 37oC for 4 hours with 100 μg/ml NA	<U+2206>mazEF 100 μg/ml NA rep2
GSM1357727	E. coli strain MC4100relA+ <U+2206>mazEF in mid log phase incubated at 37oC for 4 hours with 100 μg/ml NA	<U+2206>mazEF 100 μg/ml NA rep3
GSM1357728	E. coli strain MC4100relA+ <U+2206>mazEF in mid log phase incubated at 37oC for 4 hours with 10 μg/ml NA	<U+2206>mazEF 10 μg/ml NA rep1
GSM1357729	E. coli strain MC4100relA+ <U+2206>mazEF in mid log phase incubated at 37oC for 4 hours with 10 μg/ml NA	<U+2206>mazEF 10 μg/ml NA rep2
GSM1357730	E. coli strain MC4100relA+ <U+2206>mazEFlexA3 in mid log phase incubated at 37oC for 4 hours without treatment	<U+2206>mazEFlexA3 0 μg/ml NA rep1
GSM1357731	E. coli strain MC4100relA+ <U+2206>mazEFlexA3 in mid log phase incubated at 37oC for 4 hours without treatment	<U+2206>mazEFlexA3 0 μg/ml NA rep2
GSM1357732	E. coli strain MC4100relA+ <U+2206>mazEFlexA3 in mid log phase incubated at 37oC for 4 hours with 100 μg/ml NA	<U+2206>mazEFlexA3 100 μg/ml NA rep1
GSM1357733	E. coli strain MC4100relA+ <U+2206>mazEFlexA3 in mid log phase incubated at 37oC for 4 hours with 100 μg/ml NA	<U+2206>mazEFlexA3 100 μg/ml NA rep2
GSM1357734	E. coli strain MC4100relA+ <U+2206>mazEFlexA3 in mid log phase incubated at 37oC for 4 hours with 10 μg/ml NA	<U+2206>mazEFlexA3 10 μg/ml NA rep1
GSM1357735	E. coli strain MC4100relA+ <U+2206>mazEFlexA3 in mid log phase incubated at 37oC for 4 hours with 10 μg/ml NA	<U+2206>mazEFlexA3 10 μg/ml NA rep2
GSM1361661	fermentation sample, 2,5 h	T0, phosphate excess
GSM1361662	fermentation sample, 4 h	T1, phosphate limitation
GSM1361663	fermentation sample, 6 h	T2, phosphate limitation
GSM1361664	fermentation sample, 8 h	T3, phosphate limitation
GSM1361665	fermentation sample, 11 h	T4, phosphate limitation
GSM1361666	fermentation sample, 17 h	T5, phosphate limitation
GSM1361667	fermentation sample, 22 h	T6, phosphate limitation
GSM1361668	fermentation sample, 25 h	T7, phosphate limitation
GSM1361669	fermentation sample, 28 h	T8, phosphate limitation
GSM1361670	fermentation sample, 32 h	T9, fermentation end
GSM1412763	delta_bolA_exponential_replicate_1	delta_bolA_exponential_replicate_1
GSM1412764	delta_bolA_exponential_replicate_2	delta_bolA_exponential_replicate_2
GSM1412765	delta_bolA_exponential_replicate_3	delta_bolA_exponential_replicate_3
GSM1412766	BolA_overexpression_exponential_replicate_1	BolA_overexpression_exponential_replicate_1
GSM1412767	BolA_overexpression_exponential_replicate_2	BolA_overexpression_exponential_replicate_2
GSM1412768	BolA_overexpression_exponential_replicate_3	BolA_overexpression_exponential_replicate_3
GSM1412769	delta_bolA_stationnary_replicate_1	delta_bolA_stationnary_replicate_1
GSM1412770	delta_bolA_stationnary_replicate_2	delta_bolA_stationnary_replicate_2
GSM1412771	delta_bolA_stationnary_replicate_3	delta_bolA_stationnary_replicate_3
GSM1412772	BolA_overexpression_stationnary_replicate_1	BolA_overexpression_stationnary_replicate_1
GSM1412773	BolA_overexpression_stationnary_replicate_2	BolA_overexpression_stationnary_replicate_2
GSM1412774	BolA_overexpression_stationnary_replicate_3	BolA_overexpression_stationnary_replicate_3
GSM1436938	BW25113 with deoxycholate stress	BW25113 HEPES-glu 30 min 4.5% deoxycholate
GSM1436939	BW25113 ΔmqsRA with deoxycholate stress	BW25113 ΔmqsRA HEPES-glu 30 min 4.5% deoxycholate
GSM1496404	Escherchia coli HB101	HB101, biological rep2
GSM1496405	Escherchia coli HB101	HB101, biological rep3
GSM1496406	Escherchia coli HB101 exposed to C. elegans for 24 hours	HB101, exposed to C. elegans, biological rep1
GSM1496407	Escherchia coli HB101 exposed to C. elegans for 24 hours	HB101, exposed to C. elegans, biological rep2
GSM1496408	Escherchia coli HB101 exposed to C. elegans for 24 hours	HB101, exposed to C. elegans, biological rep3
GSM1496409	Escherchia coli HB101 exposed to Giardia for 24 hours	HB101, exposed to Giardia, biological rep1
GSM1496410	Escherchia coli HB101 exposed to Giardia for 24 hours	HB101, exposed to Giardia, biological rep2
GSM1496411	Escherchia coli HB101 exposed to Giardia for 24 hours	HB101, exposed to Giardia, biological rep3
GSM1496412	Escherchia coli HB101 exposed to C. elegans and Giardia for 24 hours	HB101, exposed to C. elegans and Giardia, biological rep1
GSM1496413	Escherchia coli HB101 exposed to C. elegans and Giardia for 24 hours	HB101, exposed to C. elegans and Giardia, biological rep2
GSM1496414	Escherchia coli HB101 exposed to C. elegans and Giardia for 24 hours	HB101, exposed to C. elegans and Giardia, biological rep3
GSM1509312	E. coli incubated with GST protein alone for 10 min	E. coli incubated with GST protein for 10 min, biological rep1
GSM1509313	E. coli incubated with GST protein alone for 10 min	E. coli incubated with GST protein for 10 min, biological rep2
GSM1509314	E. coli incubated with GST protein alone for 10 min	E. coli incubated with GST protein for 10 min, biological rep3
GSM1509315	E. coli incubated with GST-fused Drosophila immune proteins for 10 min	E. coli incubated with GST-fused Drosophila immune proteins for 10 min, biological rep1
GSM1509316	E. coli incubated with GST-fused Drosophila immune proteins for 10 min	E. coli incubated with GST-fused Drosophila immune proteins for 10 min, biological rep2
GSM1509317	E. coli incubated with GST-fused Drosophila immune proteins for 10 min	E. coli incubated with GST-fused Drosophila immune proteins for 10 min, biological rep3
GSM1519572	E. coli wt grown in glucose batch minimal media, cells were harvested at exponential phase, biological rep1	E. coli wt_batch_repl1
GSM1519573	E. coli wt grown in glucose batch minimal media, cells were harvested at exponential phase, biological rep2	E. coli wt_batch_repl2
GSM1519574	E. coli wt grown in glucose batch minimal media, cells were harvested at exponential phase, biological rep3	E. coli wt_batch_repl3
GSM1519575	E. coli <U+2206>cobB grown in glucose batch minimal media, cells were harvested at exponential phase, biological rep1	E. coli <U+2206>cobB_batch_repl1
GSM1519576	E. coli <U+2206>cobB grown in glucose batch minimal media, cells were harvested at exponential phase, biological rep2	E. coli <U+2206>cobB_batch_repl2
GSM1519577	E. coli <U+2206>cobB grown in glucose batch minimal media, cells were harvested at exponential phase, biological rep3	E. coli <U+2206>cobB_batch_repl3
GSM1519578	E. coli <U+2206>patZ grown in glucose batch minimal media, cells were harvested at exponential phase, biological rep1	E. coli <U+2206>patZ_batch_repl1
GSM1519579	E. coli <U+2206>patZ grown in glucose batch minimal media, cells were harvested at exponential phase, biological rep2	E. coli <U+2206>patZ_batch_repl2
GSM1519580	E. coli <U+2206>patZ grown in glucose batch minimal media, cells were harvested at exponential phase, biological rep3	E. coli <U+2206>patZ_batch_repl3
GSM1519581	E. coli wt grown in minimal media glucose limited chemostat at dilution rate of 0.2 h-1, biological rep1	E. coli wt_chemostat_repl1
GSM1519582	E. coli wt grown in minimal media glucose limited chemostat at dilution rate of 0.2 h-1, biological rep2	E. coli wt_chemostat_repl2
GSM1519583	E. coli wt grown in minimal media glucose limited chemostat at dilution rate of 0.2 h-1, biological rep3	E. coli wt_chemostat_repl3
GSM1519584	E. coli <U+2206>cobB grown in minimal media glucose limited chemostat at dilution rate of 0.2 h-1, biological rep1	E. coli <U+2206>cobB_chemostat_repl1
GSM1519585	E. coli <U+2206>cobB grown in minimal media glucose limited chemostat at dilution rate of 0.2 h-1, biological rep2	E. coli <U+2206>cobB_chemostat_repl2
GSM1519586	E. coli <U+2206>cobB grown in minimal media glucose limited chemostat at dilution rate of 0.2 h-1, biological rep3	E. coli <U+2206>cobB_chemostat_repl3
GSM1519587	E. coli <U+2206>patZ grown in minimal media glucose limited chemostat at dilution rate of 0.2 h-1, biological rep1	E. coli <U+2206>patZ_chemostat_repl1
GSM1519588	E. coli <U+2206>patZ grown in minimal media glucose limited chemostat at dilution rate of 0.2 h-1, biological rep2	E. coli <U+2206>patZ_chemostat_repl2
GSM1519589	E. coli <U+2206>patZ grown in minimal media glucose limited chemostat at dilution rate of 0.2 h-1, biological rep3	E. coli <U+2206>patZ_chemostat_repl3
GSM1536223	pBAD-obgG166V	E. coli_pBAD-obgG166V_repA
GSM1536224	pBAD-obgG166V	E. coli_pBAD-obgG166V_repB
GSM1536225	pBAD-obgG166V	E. coli_pBAD-obgG166V_repC
GSM1536226	WT	E. coli_WT_repA
GSM1536227	WT	E. coli_WT_repB
GSM1536228	WT	E. coli_WT_repC
GSM1536229	pBAD-obgWT	E. coli_pBAD-obgWT_repA
GSM1536230	pBAD-obgWT	E. coli_pBAD-obgWT_repB
GSM1536231	pBAD-obgWT	E. coli_pBAD-obgWT_repC
GSM1536232	pHN1009-obg	E. coli_pHN1009-obg_repA
GSM1536233	pHN1009-obg	E. coli_pHN1009-obg_repB
GSM1536234	pHN1009-obg	E. coli_pHN1009-obg_repC
GSM1545928	wt bacteria	wt
GSM1545929	glmY mutant bacteria	glmY
GSM1545930	glmZ mutant bacteria	glmZ
GSM1594176	Escherichia coli K-12 tynA- at time of induction of tynA expression	tynA- at T0
GSM1594177	Escherichia coli K-12 wt at time of induction of tynA expression	tynA- at T1h
GSM1594178	Escherichia coli K-12 tynA- 1h after induction of tynA expression	tynA- at T4h
GSM1594179	Escherichia coli K-12 wt 1h after the induction of tynA expression	wt at T0
GSM1594180	Escherichia coli K-12 tynA- 4h after the induction of tynA expression	wt at T1h
GSM1594181	Escherichia coli K-12 wt 4h after the induction of tynA expression	wt at T4h
GSM1639535	10-HT874-PS-60min1	10-HT874-PS-60min1
GSM1639536	11-HT874-PS-60min2	11-HT874-PS-60min2
GSM1639537	12-HT874-PS-60min3	12-HT874-PS-60min3
GSM1639538	1-HT873-PA1-	1-HT873-PA1
GSM1639539	2-HT873-PA2-	2-HT873-PA2
GSM1639540	3-HT873-PA3-	3-HT873-PA3
GSM1639541	4-HT873-PS-60min1	4-HT873-PS-60min1
GSM1639542	5-HT873-PS-60min2	5-HT873-PS-60min2
GSM1639543	6-HT873-PS-60min3	6-HT873-PS-60min3
GSM1639544	7-HT874-PA1-	7-HT874-PA1
GSM1639545	8-HT874-PA2-	8-HT874-PA2
GSM1639546	9-HT874-PA3-	9-HT874-PA3
GSM1639547	875-PA1--	HT875-PA1
GSM1639548	875-PA2--	HT875-PA2
GSM1639549	875-PA3--	HT875-PA3
GSM1639550	873-Con1--	HT873-Con1
GSM1639551	873-Con2--	HT873-Con2
GSM1639552	873-Con3--	HT873-Con3
GSM1639553	873-PA1--	HT873-PA1
GSM1639554	873-PA2--	HT873-PA2
GSM1639555	873-PA3--	HT873-PA3
GSM1639556	875-Con1--	HT875-Con1
GSM1639557	875-Con2--	HT875-Con2
GSM1639558	875-Con3--	HT875-Con3
GSM1662185	bacteria that were not processed using microfluidic device	Benchtop sample, Biological replicate 1
GSM1662186	bacteria that were not processed using microfluidic device	Benchtop sample, Biological replicate 2
GSM1662187	bacteria that were not processed using microfluidic device	Benchtop sample, Biological replicate 3
GSM1662188	bacteria that were not processed using microfluidic device	Benchtop sample, Biological replicate 4
GSM1662189	bacteria that were not processed using microfluidic device	Benchtop sample, Biological replicate 5
GSM1662190	bacteria that were processed using microfluidic device	Device sample, Biological replicate 1
GSM1662191	bacteria that were processed using microfluidic device	Device sample, Biological replicate 2
GSM1662192	bacteria that were processed using microfluidic device	Device sample, Biological replicate 3
GSM1662193	bacteria that were processed using microfluidic device	Device sample, Biological replicate 4
GSM1662194	bacteria that were processed using microfluidic device	Device sample, Biological replicate 5
GSM1663051	bacteria that were grown in human serum, then challenged with ciprofloxacin	Serum challenged, Biological replicate 1
GSM1663052	bacteria that were grown in human serum, then challenged with ciprofloxacin	Serum challenged, Biological replicate 2
GSM1663053	bacteria that were grown in human serum, then challenged with ciprofloxacin	Serum challenged, Biological replicate 3
GSM1663054	bacteria that were grown in human serum, then challenged with ciprofloxacin	Serum challenged, Biological replicate 4
GSM1663055	bacteria that were grown in human serum, then challenged with ciprofloxacin	Serum challenged, Biological replicate 5
GSM1663056	bacteria that were grown in human serum	Serum Unchallenged, Biological replicate 1
GSM1663057	bacteria that were grown in human serum	Serum Unchallenged, Biological replicate 2
GSM1663058	bacteria that were grown in human serum	Serum Unchallenged, Biological replicate 3
GSM1663059	bacteria that were grown in human serum	Serum Unchallenged, Biological replicate 4
GSM1663060	bacteria that were grown in human IST, then challenged with ciprofloxacin	IST challenged, Biological replicate 1
GSM1663061	bacteria that were grown in human IST, then challenged with ciprofloxacin	IST challenged, Biological replicate 2
GSM1663062	bacteria that were grown in human IST, then challenged with ciprofloxacin	IST challenged, Biological replicate 3
GSM1663063	bacteria that were grown in human IST, then challenged with ciprofloxacin	IST challenged, Biological replicate 4
GSM1663064	bacteria that were grown in human IST, then challenged with ciprofloxacin	IST challenged, Biological replicate 5
GSM1663065	bacteria that were grown in human IST	IST Unchallenged, Biological replicate 1
GSM1663066	bacteria that were grown in human IST	IST Unchallenged, Biological replicate 2
GSM1663067	bacteria that were grown in human IST	IST Unchallenged, Biological replicate 3
GSM1663068	bacteria that were grown in human IST	IST Unchallenged, Biological replicate 4
GSM1663069	bacteria that were grown in human whole blood, then challenged with ciprofloxacin after 24 hours from onset of growth, then left to grow for another 6 hours	Challenged, Biological replicate 1
GSM1663070	bacteria that were grown in human whole blood, then challenged with ciprofloxacin after 24 hours from onset of growth, then left to grow for another 6 hours	Challenged, Biological replicate 2
GSM1663071	bacteria that were grown in human whole blood, then challenged with ciprofloxacin after 24 hours from onset of growth, then left to grow for another 6 hours	Challenged, Biological replicate 3
GSM1663072	bacteria that were grown in human whole blood, then challenged with ciprofloxacin after 24 hours from onset of growth, then left to grow for another 6 hours	Challenged, Biological replicate 4
GSM1663073	bacteria that were grown in human whole blood, then challenged with ciprofloxacin after 24 hours from onset of growth, then left to grow for another 6 hours	Challenged, Biological replicate 5
GSM1663074	bacteria that were grown in human whole blood for 30 hours	Unchallenged, Biological replicate 1
GSM1663075	bacteria that were grown in human whole blood for 30 hours	Unchallenged, Biological replicate 2
GSM1663076	bacteria that were grown in human whole blood for 30 hours	Unchallenged, Biological replicate 3
GSM1663077	bacteria that were grown in human whole blood for 30 hours	Unchallenged, Biological replicate 4
GSM1663078	bacteria that were grown in human whole blood for 30 hours	Unchallenged, Biological replicate 5
GSM1864040	synchronized grown E.coli W3110<U+2206>torRdnaC2/pTorR-GFP cells at 0 min (present TorR-GFP)	E.coli W3110 cells (with induction) at 0 min, biological rep2
GSM1864041	synchronized grown E.coli W3110<U+2206>torRdnaC2/pTorR-GFP cells at 0 min (present TorR-GFP)	E.coli W3110 cells (with induction) at 0 min, biological rep4
GSM1864042	synchronized grown E.coli W3110<U+2206>torRdnaC2/pTorR-GFP cells at 0 min (present TorR-GFP)	E.coli W3110 cells (with induction) at 0 min, biological rep5
GSM1864043	synchronized grown E.coli W3110<U+2206>torRdnaC2/pTorR-GFP cells at 45 min (present TorR-GFP)	E.coli W3110 cells (with induction) at 45 min, biological rep2
GSM1864044	synchronized grown E.coli W3110<U+2206>torRdnaC2/pTorR-GFP cells at 45 min (present TorR-GFP)	E.coli W3110 cells (with induction) at 45 min, biological rep4
GSM1864045	synchronized grown E.coli W3110<U+2206>torRdnaC2/pTorR-GFP cells at 45 min (present TorR-GFP)	E.coli W3110 cells (with induction) at 45 min, biological rep5
GSM1864046	synchronized grown E.coli W3110<U+2206>torRdnaC2/pTorR-GFP cells at 0 min (absent TorR-GFP)	E.coli W3110 cells (without induction) at 0 min, biological rep1
GSM1864047	synchronized grown E.coli W3110<U+2206>torRdnaC2/pTorR-GFP cells at 0 min (absent TorR-GFP)	E.coli W3110 cells (without induction) at 0 min, biological rep2
GSM1864048	synchronized grown E.coli W3110<U+2206>torRdnaC2/pTorR-GFP cells at 45 min (absent TorR-GFP)	E.coli W3110 cells (without induction) at 45 min, biological rep1
GSM1864049	synchronized grown E.coli W3110<U+2206>torRdnaC2/pTorR-GFP cells at 45 min (absent TorR-GFP)	E.coli W3110 cells (without induction) at 45 min, biological rep2
GSM1869310	Bacterial cells, mid-exponential growth phase	Untreated bacteria, biological rep1
GSM1869311	Bacterial cells, mid-exponential growth phase	Untreated bacteria, biological rep2
GSM1869312	Bacterial cells, mid-exponential growth phase	Untreated bacteria, biological rep3
GSM1869313	Bacterial cells, mid-exponential growth phase	Bacteria treated with benzalkonium chloride, biological rep1
GSM1869314	Bacterial cells, mid-exponential growth phase	Bacteria treated with benzalkonium chloride, biological rep2
GSM1869315	Bacterial cells, mid-exponential growth phase	Bacteria treated with benzalkonium chloride, biological rep3
GSM1869316	Bacterial cells, mid-exponential growth phase	Bacteria treated with chlorhexidine, biological rep1
GSM1869317	Bacterial cells, mid-exponential growth phase	Bacteria treated with chlorhexidine, biological rep2
GSM1869318	Bacterial cells, mid-exponential growth phase	Bacteria treated with chlorhexidine, biological rep3
GSM1869319	Bacterial cells, mid-exponential growth phase	Bacteria treated with ethanol, biological rep1
GSM1869320	Bacterial cells, mid-exponential growth phase	Bacteria treated with ethanol, biological rep2
GSM1869321	Bacterial cells, mid-exponential growth phase	Bacteria treated with ethanol, biological rep3
GSM1869322	Bacterial cells, mid-exponential growth phase	Bacteria treated with hydrogen peroxide, biological rep1
GSM1869323	Bacterial cells, mid-exponential growth phase	Bacteria treated with hydrogen peroxide, biological rep2
GSM1869324	Bacterial cells, mid-exponential growth phase	Bacteria treated with hydrogen peroxide, biological rep3
GSM1869325	Bacterial cells, mid-exponential growth phase	Bacteria treated with triclosan, biological rep1
GSM1869326	Bacterial cells, mid-exponential growth phase	Bacteria treated with triclosan, biological rep2
GSM1869327	Bacterial cells, mid-exponential growth phase	Bacteria treated with triclosan, biological rep3
GSM1893188	Escherichia coli in late exponential growth	WT MG1655
GSM2060856	E.coli L-1339/2013 , grown in LB for 72h	non-biofilm forming control, biological rep1
GSM2060857	E.coli L-1339/2013 , grown in LB for 72h	non-biofilm forming control, biological rep2
GSM2060858	E.coli L-1339/2013 , grown in LB for 72h	non-biofilm forming control, biological rep3
GSM2060859	E.coli L-1216/2013 biofilm cells , grown in LB for 72h	E. coli Biofilm cells, biological rep1
GSM2060860	E.coli L-1216/2013 biofilm cells , grown in LB for 72h	E. coli Biofilm cells, biological rep2
GSM2060861	E.coli L-1216/2013 biofilm cells , grown in LB for 72h	E. coli Biofilm cells, biological rep3
GSM2060862	E.coli L-1216/2013 planktonic cells , grown in LB for 72h	E. coli planktonic cells, biological rep1
GSM2060863	E.coli L-1216/2013 planktonic cells , grown in LB for 72h	E. coli planktonic cells, biological rep2
GSM2060864	E.coli L-1216/2013 planktonic cells , grown in LB for 72h	E. coli planktonic cells, biological rep3
GSM2109778	control strain with hypoxanthine	WT_0_Hx Rep1
GSM2109779	control strain w/o hypoxanthine 15 min at low dilution protocol	WT_15 (Low Dilution) Rep1
GSM2109780	control strain w/o hypoxanthine 30 min at low dilution protocol	WT_30 (Low Dilution) Rep1
GSM2109781	control strain w/o hypoxanthine 45 min at low dilution protocol	WT_45 (Low Dilution) Rep1
GSM2109782	control strain w/o hypoxanthine 60 min at low dilution protocol	WT_60 (Low Dilution) Rep1
GSM2109783	control strain w/o hypoxanthine 120 min at low dilution protocol	WT_120 (Low Dilution) Rep1
GSM2109784	control strain with hypoxanthine	WT_0_Hx Rep2
GSM2109785	control strain w/o hypoxanthine 15 min at low dilution protocol	WT_15 (Low Dilution) Rep2
GSM2109786	control strain w/o hypoxanthine 30 min at low dilution protocol	WT_30 (Low Dilution) Rep2
GSM2109787	control strain w/o hypoxanthine 45 min at low dilution protocol	WT_45 (Low Dilution) Rep2
GSM2109788	control strain w/o hypoxanthine 60 min at low dilution protocol	WT_60 (Low Dilution) Rep2
GSM2109789	control strain w/o hypoxanthine 120 min at low dilution protocol	WT_120 (Low Dilution) Rep2
GSM2109790	control strain with hypoxanthine	WT_0_Hx Rep3
GSM2109791	control strain w/o hypoxanthine 15 min at low dilution protocol	WT_15 (Low Dilution) Rep3
GSM2109792	control strain w/o hypoxanthine 30 min at low dilution protocol	WT_30 (Low Dilution) Rep3
GSM2109793	control strain w/o hypoxanthine 45 min at low dilution protocol	WT_45 (Low Dilution) Rep3
GSM2109794	control strain w/o hypoxanthine 60 min at low dilution protocol	WT_60 (Low Dilution) Rep3
GSM2109795	control strain w/o hypoxanthine 120 min at low dilution protocol	WT_120 (Low Dilution) Rep3
GSM2109796	optA1 strain with hypoxanthine	optA1_0_Hx Rep1
GSM2109797	optA1 strain w/o hypoxanthine 15 min at low dilution protocol	optA1_15 (Low Dilution) Rep1
GSM2109798	optA1 strain w/o hypoxanthine 30 min at low dilution protocol	optA1_30 (Low Dilution) Rep1
GSM2109799	optA1 strain w/o hypoxanthine 45 min at low dilution protocol	optA1_45 (Low Dilution) Rep1
GSM2109800	optA1 strain w/o hypoxanthine 60 min at low dilution protocol	optA1_60 (Low Dilution) Rep1
GSM2109801	optA1 strain w/o hypoxanthine 120 min at low dilution protocol	optA1_120 (Low Dilution) Rep1
GSM2109802	optA1 strain with hypoxanthine	optA1_0_Hx Rep2
GSM2109803	optA1 strain w/o hypoxanthine 15 min at low dilution protocol	optA1_15 (Low Dilution) Rep2
GSM2109804	optA1 strain w/o hypoxanthine 30 min at low dilution protocol	optA1_30 (Low Dilution) Rep2
GSM2109805	optA1 strain w/o hypoxanthine 45 min at low dilution protocol	optA1_45 (Low Dilution) Rep2
GSM2109806	optA1 strain w/o hypoxanthine 60 min at low dilution protocol	optA1_60 (Low Dilution) Rep2
GSM2109807	optA1 strain w/o hypoxanthine 120 min at low dilution protocol	optA1_120 (Low Dilution) Rep2
GSM2109808	optA1 strain with hypoxanthine	optA1_0_Hx Rep3
GSM2109809	optA1 strain w/o hypoxanthine 15 min at low dilution protocol	optA1_15 (Low Dilution) Rep3
GSM2109810	optA1 strain w/o hypoxanthine 30 min at low dilution protocol	optA1_30 (Low Dilution) Rep3
GSM2109811	optA1 strain w/o hypoxanthine 45 min at low dilution protocol	optA1_45 (Low Dilution) Rep3
GSM2109812	optA1 strain w/o hypoxanthine 60 min at low dilution protocol	optA1_60 (Low Dilution) Rep3
GSM2109813	optA1 strain w/o hypoxanthine 120 min at low dilution protocol	optA1_120 (Low Dilution) Rep3
GSM2109814	gpt strain with hypoxanthine	gpt_0_Hx Rep1
GSM2109815	gpt strain w/o hypoxanthine 15 min at low dilution protocol	gpt_15 (Low Dilution) Rep1
GSM2109816	gpt strain w/o hypoxanthine 30 min at low dilution protocol	gpt_30 (Low Dilution) Rep1
GSM2109817	gpt strain w/o hypoxanthine 45 min at low dilution protocol	gpt_45 (Low Dilution) Rep1
GSM2109818	gpt strain w/o hypoxanthine 60 min at low dilution protocol	gpt_60 (Low Dilution) Rep1
GSM2109819	gpt strain w/o hypoxanthine 120 min at low dilution protocol	gpt_120 (Low Dilution) Rep1
GSM2109820	gpt strain with hypoxanthine	gpt_0_Hx Rep2
GSM2109821	gpt strain w/o hypoxanthine 15 min at low dilution protocol	gpt_15 (Low Dilution) Rep2
GSM2109822	gpt strain w/o hypoxanthine 30 min at low dilution protocol	gpt_30 (Low Dilution) Rep2
GSM2109823	gpt strain w/o hypoxanthine 45 min at low dilution protocol	gpt_45 (Low Dilution) Rep2
GSM2109824	gpt strain w/o hypoxanthine 60 min at low dilution protocol	gpt_60 (Low Dilution) Rep2
GSM2109825	gpt strain w/o hypoxanthine 120 min at low dilution protocol	gpt_120 (Low Dilution) Rep2
GSM2109826	gpt strain with hypoxanthine	gpt_0_Hx Rep3
GSM2109827	gpt strain w/o hypoxanthine 15 min at low dilution protocol	gpt_15 (Low Dilution) Rep3
GSM2109828	gpt strain w/o hypoxanthine 30 min at low dilution protocol	gpt_30 (Low Dilution) Rep3
GSM2109829	gpt strain w/o hypoxanthine 45 min at low dilution protocol	gpt_45 (Low Dilution) Rep3
GSM2109830	gpt strain w/o hypoxanthine 60 min at low dilution protocol	gpt_60 (Low Dilution) Rep3
GSM2109831	gpt strain w/o hypoxanthine 120 min at low dilution protocol	gpt_120 (Low Dilution) Rep3
GSM2109832	optA1 gpt strain with hypoxanthine	optA1_gpt_0_Hx Rep1
GSM2109833	optA1 gpt strain w/o hypoxanthine 15 min at low dilution protocol	optA1_gpt_15 (Low Dilution) Rep1
GSM2109834	optA1 gpt strain w/o hypoxanthine 30 min at low dilution protocol	optA1_gpt_30 (Low Dilution) Rep1
GSM2109835	optA1 gpt strain w/o hypoxanthine 45 min at low dilution protocol	optA1_gpt_45 (Low Dilution) Rep1
GSM2109836	optA1 gpt strain w/o hypoxanthine 60 min at low dilution protocol	optA1_gpt_60 (Low Dilution) Rep1
GSM2109837	optA1 gpt strain w/o hypoxanthine 120 min at low dilution protocol	optA1_gpt_120 (Low Dilution) Rep1
GSM2109838	optA1 gpt strain w/o hypoxanthine 360 min at low dilution protocol	optA1_gpt_360 (Low Dilution) Rep1
GSM2109839	optA1 gpt strain w/o hypoxanthine 120 min at high dilution protocol	optA1_gpt_120 (High Dilution) Rep1
GSM2109840	optA1 gpt strain w/o hypoxanthine 180 min at high dilution protocol	optA1_gpt_180 (High Dilution) Rep1
GSM2109841	optA1 gpt strain w/o hypoxanthine 240 min at high dilution protocol	optA1_gpt_240 (High Dilution) Rep1
GSM2109842	optA1 gpt strain w/o hypoxanthine 300 min at high dilution protocol	optA1_gpt_300 (High Dilution) Rep1
GSM2109843	optA1 gpt strain w/o hypoxanthine 360 min at high dilution protocol	optA1_gpt_360 (High Dilution) Rep1
GSM2109844	optA1 gpt strain with hypoxanthine	optA1_gpt_0_Hx Rep2
GSM2109845	optA1 gpt strain w/o hypoxanthine 15 min at low dilution protocol	optA1_gpt_15 (Low Dilution) Rep2
GSM2109846	optA1 gpt strain w/o hypoxanthine 30 min at low dilution protocol	optA1_gpt_30 (Low Dilution) Rep2
GSM2109847	optA1 gpt strain w/o hypoxanthine 45 min at low dilution protocol	optA1_gpt_45 (Low Dilution) Rep2
GSM2109848	optA1 gpt strain w/o hypoxanthine 60 min at low dilution protocol	optA1_gpt_60 (Low Dilution) Rep2
GSM2109849	optA1 gpt strain w/o hypoxanthine 120 min at low dilution protocol	optA1_gpt_120 (Low Dilution) Rep2
GSM2109850	optA1 gpt strain w/o hypoxanthine 360 min at low dilution protocol	optA1_gpt_360 (Low Dilution) Rep2
GSM2109851	optA1 gpt strain w/o hypoxanthine 120 min at high dilution protocol	optA1_gpt_120 (High Dilution) Rep2
GSM2109852	optA1 gpt strain w/o hypoxanthine 180 min at high dilution protocol	optA1_gpt_180 (High Dilution) Rep2
GSM2109853	optA1 gpt strain w/o hypoxanthine 240 min at high dilution protocol	optA1_gpt_240 (High Dilution) Rep2
GSM2109854	optA1 gpt strain w/o hypoxanthine 300 min at high dilution protocol	optA1_gpt_300 (High Dilution) Rep2
GSM2109855	optA1 gpt strain w/o hypoxanthine 360 min at high dilution protocol	optA1_gpt_360 (High Dilution) Rep2
GSM2109856	optA1 gpt strain with hypoxanthine	optA1_gpt_0_Hx Rep3
GSM2109857	optA1 gpt strain w/o hypoxanthine 15 min at low dilution protocol	optA1_gpt_15 (Low Dilution) Rep3
GSM2109858	optA1 gpt strain w/o hypoxanthine 30 min at low dilution protocol	optA1_gpt_30 (Low Dilution) Rep3
GSM2109859	optA1 gpt strain w/o hypoxanthine 45 min at low dilution protocol	optA1_gpt_45 (Low Dilution) Rep3
GSM2109860	optA1 gpt strain w/o hypoxanthine 60 min at low dilution protocol	optA1_gpt_60 (Low Dilution) Rep3
GSM2109861	optA1 gpt strain w/o hypoxanthine 120 min at low dilution protocol	optA1_gpt_120 (Low Dilution) Rep3
GSM2109862	optA1 gpt strain w/o hypoxanthine 360 min at low dilution protocol	optA1_gpt_360 (Low Dilution) Rep3
GSM2109863	optA1 gpt strain w/o hypoxanthine 120 min at high dilution protocol	optA1_gpt_120 (High Dilution) Rep3
GSM2109864	optA1 gpt strain w/o hypoxanthine 180 min at high dilution protocol	optA1_gpt_180 (High Dilution) Rep3
GSM2109865	optA1 gpt strain w/o hypoxanthine 240 min at high dilution protocol	optA1_gpt_240 (High Dilution) Rep3
GSM2109866	optA1 gpt strain w/o hypoxanthine 300 min at high dilution protocol	optA1_gpt_300 (High Dilution) Rep3
GSM2109867	optA1 gpt strain w/o hypoxanthine 360 min at high dilution protocol	optA1_gpt_360 (High Dilution) Rep3
GSM2178970	bacteria harvested from blood of chickens	E058 in vivo, biological rep1
GSM2178971	bacteria harvested from blood of chickens	E058 in vivo, biological rep2
GSM2178972	bacteria harvested from blood of chickens	E058 in vivo, biological rep3
GSM2178973	bacteria grown in LB in vitro	E058 in vitro, biological rep1
GSM2178974	bacteria grown in LB in vitro	E058 in vitro, biological rep2
GSM175728	A wild type commensal strain	Growth at 30 C until mid-log phase (30oC, no NaCl)
GSM175737	A wild type commensal strain	grown in K medium at 30º C with added 0.3 M NaCl and harvested during mid log phase
GSM183470	A wild type commensal strain	grown in K medium at 30º C with added 0.3 M NaCl and harvested during mid log phase
GSM183471	A wild type commensal strain	grown in K medium at 43º C and harvested during mid log phase
GSM183472	A wild type commensal strain	grown in K medium at 30º C with added 0.3 M NaCl and harvested during mid log phase
GSM183473	A wild type commensal strain	grown in K medium at 30º C with added 0.3 M NaCl and harvested during mid log phase
GSM183488	A wild type commensal strain	grown in K medium at 43º C and harvested during mid log phase
GSM183489	A wild type commensal strain	grown in K medium at 30º C with added 0.3 M NaCl and harvested during mid log phase
GSM183490	A wild type commensal strain	grown in K medium at 30º C with added 0.3 M NaCl and harvested during mid log phase
GSM183491	A wild type commensal strain	grown in K medium at 43º C and harvested during mid log phase
GSM183492	A wild type commensal strain	grown in K medium at 30º C with added 0.3 M NaCl and harvested during mid log phase
GSM183493	A wild type commensal strain	grown in K medium at 30º C with added 0.3 M NaCl and harvested during mid log phase
GSM183494	A wild type commensal strain	grown in K medium at 43º C and harvested during mid log phase
GSM183495	A wild type commensal strain	grown in K medium at 30º C with added 0.3 M NaCl and harvested during mid log phase
GSM183496	A wild type commensal strain	grown in K medium at 30º C with added 0.3 M NaCl and harvested during mid log phase
GSM183497	A wild type commensal strain	grown in K medium at 43º C and harvested during mid log phase
GSM183498	A wild type commensal strain	grown in K medium at 30º C with added 0.3 M NaCl and harvested during mid log phase
GSM183499	A wild type commensal strain	grown in K medium at 30º C with added 0.3 M NaCl and harvested during mid log phase
GSM252012	E. coli K-12 MG1655 wild type after 15 hours of growth in LB plates at 37ºC
GSM252013	E. coli K-12 MG1655 delta yncC after 15 hours of growth in LB plates at 37ºC
GSM272059	E. coli K12 strain BW25113	Genotype: ∆(araD-araB)567, ∆lacZ4787(::rrnB-3), lambda-, rph-1, ∆(rhaD-rhaB)568, hsdR514
GSM272060	E. coli K12 strain BW25113	A wild type commensal strain ∆(araD-araB)567, ∆lacZ4787(::rrnB-3), lambda-, rph-1, ∆(rhaD-rhaB)568, hsdR514
GSM272063	E. coli K12 strain BW25113	A wild type commensal strain ∆(araD-araB)567, ∆lacZ4787(::rrnB-3), lambda-, rph-1, ∆(rhaD-rhaB)568, hsdR514
GSM272064	E. coli K12 strain BW25113	A commensal strain ∆(araD-araB)567, ∆lacZ4787(::rrnB-3), lambda-, rph-1, ∆(rhaD-rhaB)568, hsdR514
GSM272065	E. coli K12 strain BW25113	∆(araD-araB)567, ∆lacZ4787(::rrnB-3), lambda-, rph-1, ∆(rhaD-rhaB)568, hsdR514
GSM272066	E. coli K12 strain BW25113	∆(araD-araB)567, ∆lacZ4787(::rrnB-3), lambda-, rph-1, ∆(rhaD-rhaB)568, hsdR514
GSM315537	E. coli grown in LB broth + 10% cranberry juice
GSM315538	E. coli grown in LB broth + 10% cranberry juice
GSM355063	E. coli K-12 BW25113/pCA24N at OD600=0.5 LB 37C then 2 mM IPTG for 15 min short time suspension cell
GSM355064	E. coli K-12 BW25113/pCA24N-mqsR at OD600=0.5 LB 37C then 2 mM IPTG for 15 min short time suspension cell
GSM370097	wildtype	overnight colony growth
GSM370098	wildtype	overnight colony growth
GSM370099	wildtype colony morphology	overnight colony growth
GSM370100	L-form colony morphology	10,000U Pencillin G in media
GSM370101	L-form colony morphology	10,000U Pencillin G in media
GSM370102	L-form colony morphology	10,000U Pencillin G in media
GSM436542	0% sodiumbenzoate_0min	growth phase: stationary
GSM436549	0% sodiumbenzoate_0min	growth phase: stationary
GSM436569	0.5% (w/v) sodiumbenzoate_0min	growth phase: stationary
GSM436572	0.5% (w/v) sodiumbenzoate_0min	growth phase: stationary
GSM436574	0% sodiumbenzoate_5min	growth phase: stationary
GSM436577	0% sodiumbenzoate_5min	growth phase: stationary
GSM436588	0.5% (w/v) sodiumbenzoate_5min	growth phase: stationary
GSM436617	0.5% (w/v) sodiumbenzoate_5min	growth phase: stationary
GSM436618	0% sodiumbenzoate_15min	growth phase: stationary
GSM436619	0% sodiumbenzoate_15min	growth phase: stationary
GSM436620	0.5% (w/v) sodiumbenzoate_15min	growth phase: stationary
GSM436621	0.5% (w/v) sodiumbenzoate_15min	growth phase: stationary
GSM436622	0% sodiumbenzoate_30min	growth phase: stationary
GSM436623	0% sodiumbenzoate_30min	growth phase: stationary
GSM436624	0.5% (w/v) sodiumbenzoate_30min	growth phase: stationary
GSM436625	0.5% (w/v) sodiumbenzoate_30min	growth phase: stationary
GSM436626	0% sodiumbenzoate_60min	growth phase: stationary
GSM436627	0% sodiumbenzoate_60min	growth phase: stationary
GSM436628	0.5% (w/v) sodiumbenzoate_60min	growth phase: stationary
GSM436629	0.5% (w/v) sodiumbenzoate_60min	growth phase: stationary

## Sheet: Table S3
Samples that have the highest or lowest ME value in a specific module
Module	maxME	minME
MEivory	GSM502097	GSM511652
MEdarkred	GSM1080845	GSM999248
MEdarkolivegreen	GSM436896	GSM386665
MEdarkturquoise	GSM436897	GSM386665
MElightcyan1	GSM928170	GSM574248
MEorangered4	GSM2109787	GSM840952
MEdarkgrey	GSM1864043	GSM261493
MEgreen	GSM386663	GSM574247
MEtan	GSM490262	GSM1663061
MEblack	GSM552711	GSM701936
MEpurple	GSM604757	GSM510400
MEviolet	GSM1184421	GSM701937
MEsteelblue	GSM370094	GSM585505
MEcyan	GSM341921	GSM1220773
MElightsteelblue1	GSM1496408	GSM2109842
MEpaleturquoise	GSM840547	GSM701936
MEsienna3	GSM511652	GSM1361662
MEskyblue3	GSM389289	GSM352904
MEdarkorange	GSM1220776	GSM1357723
MEblue	GSM261492	GSM352904
MEgrey60	GSM143158	GSM386644
MEbrown4	GSM1663058	GSM352904
MEfloralwhite	GSM768842	GSM352904
MElightyellow	GSM1662190	GSM1412767
MEmagenta	GSM1869319	GSM469642
MEdarkmagenta	GSM1663052	GSM438124
MEgreenyellow	GSM1663061	GSM261492
MEdarkgreen	GSM972952	GSM760801
MEplum1	GSM384838	GSM438124
MEdarkorange2	GSM2060863	GSM352904
MElightgreen	GSM574246	GSM352904

## Sheet: Table S4
Probes modular assignment, connectivity and their functional annotation
Probes	Intramodule Connectivity	Module	Entrez ID	ORF	Annotation
1767788_s_at	117.945	black	0	IG_479933_480477-f	DEF=intergenic region
1766839_s_at	114.595	black	0	IG_1984152_1984947-f	DEF=intergenic region
1761661_s_at	114.43	black	0	IG_1255176_1255943-f	DEF=intergenic region
1761584_s_at	110.342	black	0	IG_3003809_3004355-r	DEF=intergenic region
1759220_s_at	109.776	black	0	IG_2362317_2362573-f	DEF=intergenic region
1765819_s_at	108.924	black	0	IG_2683528_2683854-r	DEF=intergenic region
1766798_s_at	108.866	black	0	IG_655192_655779-r	DEF=intergenic region
1768845_s_at	107.483	black	0	IG_1229624_1229989-r	DEF=intergenic region
1763797_s_at	104.949	black	0	IG_557978_558196-f	DEF=intergenic region
1759532_s_at	102.164	black	0	IG_3028967_3029317-f	DEF=intergenic region
1759616_s_at	101.343	black	0	IG_1222152_1222917-r	DEF=intergenic region
1761365_s_at	100.609	black	0	IG_2166389_2166733-f	DEF=intergenic region
1764729_s_at	100.32	black	0	IG_3669525_3669971-r	DEF=intergenic region
1766914_s_at	100.169	black	0	IG_1174389_1174649-r	DEF=intergenic region
1762590_s_at	99.7957	black	0	IG_706981_707556-r	DEF=intergenic region
1763282_s_at	99.7192	black	958298	Z4148	DEF=orf; Unknown function hypothetical protein Z4148 958298
1761398_s_at	99.6334	black	0	IG_3170228_3170545-f	DEF=intergenic region
1763730_s_at	97.2601	black	0	IG_3003809_3004355-f	DEF=intergenic region
1767592_s_at	96.6478	black	0	IG_714422_714634-r	DEF=intergenic region
1765716_s_at	96.1015	black	0	IG_3716794_3717106-r	DEF=intergenic region
1759860_s_at	95.8958	black	0	IG_1984152_1984947-r	DEF=intergenic region
1765884_s_at	95.3029	black	0	IG_2493313_2493598-r	DEF=intergenic region
1759081_s_at	95.1876	black	0	IG_2342190_2342884-r	DEF=intergenic region
1759772_s_at	95.055	black	0	IG_557978_558196-r	DEF=intergenic region
1764772_s_at	94.2046	black	0	IG_83709_84190-r	DEF=intergenic region
1767120_s_at	94.0927	black	0	IG_2491275_2491786-f	DEF=intergenic region
1763595_s_at	93.6239	black	0	IG_2301518_2301924-f	DEF=intergenic region
1767695_s_at	93.3151	black	916145	b3143	DEF=putative chaperone putative chaperone
1761395_s_at	91.4462	black	0	IG_2212665_2212885-f	DEF=intergenic region
1762433_s_at	91.1292	black	0	IG_1744152_1744458-f	DEF=intergenic region
1767149_s_at	90.7004	black	0	IG_503921_504137-r	DEF=intergenic region
1759257_s_at	89.8965	black	1036169	c0488	DEF=Hypothetical protein hypothetical protein c0488 1036169
1763817_s_at	89.3373	black	0	IG_3416249_3416785-r	DEF=intergenic region
1767050_s_at	89.256	black	0	IG_83709_84190-f	DEF=intergenic region
1769194_s_at	89.1296	black	0	IG_3272549_3272922-r	DEF=intergenic region
1759365_s_at	88.8347	black	0	IG_3497253_3497495-f	DEF=intergenic region
1760013_s_at	88.7782	black	0	IG_2493313_2493598-f	DEF=intergenic region
1768133_s_at	88.7395	black	0	IG_1770310_1770529-f	DEF=intergenic region
1765054_s_at	88.6814	black	917276	b1472	DEF=putative outer membrane porin protein putaive outer membrane porin protein
1762107_s_at	88.594	black	0	IG_1311688_1312043-r	DEF=intergenic region
1769104_s_at	87.6713	black	0	IG_2051351_2051664-r	DEF=intergenic region
1768875_s_at	87.6654	black	0	IG_3265240_3265473-r	DEF=intergenic region
1764069_at	87.6266	black	948546	b4038	DEF=orf, hypothetical protein pseudo yjbI 948546
1762949_s_at	87.0707	black	0	IG_1545194_1545424-r	DEF=intergenic region
1760170_s_at	86.9272	black	0	IG_1164909_1165307-r	DEF=intergenic region
1764578_s_at	86.9167	black	0	IG_3411103_3411500-r	DEF=intergenic region
1764626_s_at	86.7117	black	0	IG_655192_655779-f	DEF=intergenic region
1760505_s_at	86.6692	black	0	IG_3028967_3029317-r	DEF=intergenic region
1759119_s_at	86.5388	black	0	IG_3543836_3544194-r	DEF=intergenic region
1767422_s_at	86.3312	black	913629	b0108	DEF=prelipin peptidase dependent protein putative major pilin subunit
1766495_s_at	85.9968	black	0	IG_2627502_2627811-r	DEF=intergenic region
1762997_s_at	85.7167	black	0	IG_3630221_3630481-f	DEF=intergenic region
1764624_s_at	85.2369	black	0	IG_2051351_2051664-f	DEF=intergenic region
1760693_s_at	84.8307	black	916817	Z3479	DEF=orf; Unknown function hypothetical protein
1759495_s_at	84.0947	black	0	IG_660449_660859-f	DEF=intergenic region
1761364_s_at	83.9449	black	0	IG_1233941_1234160-r	DEF=intergenic region
1768970_s_at	83.6531	black	1038483	c2903	DEF=Hypothetical protein hypothetical protein c2903 1038483
1766106_s_at	83.0131	black	0	IG_2481360_2481774-r	DEF=intergenic region
1760027_s_at	82.9605	black	0	IG_2342190_2342884-f	DEF=intergenic region
1764636_s_at	82.3281	black	0	IG_11787_12162-r	DEF=intergenic region
1767195_s_at	82.1788	black	0	IG_3648293_3648920-f	DEF=intergenic region
1762256_s_at	82.1518	black	0	IG_3351686_3352266-r	DEF=intergenic region
1764913_s_at	81.835	black	0	IG_1115806_1116029-f	DEF=intergenic region
1761906_s_at	81.7195	black	916207	b3079	DEF=orf, hypothetical protein hypothetical protein
1760685_s_at	81.6009	black	0	IG_41932_42366-r	DEF=intergenic region
1768680_s_at	81.5078	black	914182	b1700	DEF=orf, hypothetical protein hypothetical protein
1761716_s_at	81.2492	black	916954	b0535	DEF=fimbrial Z protein; probable signal transducer transcriptional regulator FimZ
1766373_s_at	81.2079	black	0	IG_1102420_1103173-r	DEF=intergenic region
1765532_at	81.0746	black	946418	b2336	DEF=putative chaperone predicted periplasmic pilus chaperone yfcS 946418 0007047
1763849_s_at	80.9934	black	0	IG_715929_716168-r	DEF=intergenic region
1759210_s_at	80.9606	black	0	IG_1577367_1577656-f	DEF=intergenic region
1763341_at	80.9556	black	947531	b3047	DEF=putative membrane protein predicted periplasmic pilin chaperone yqiH 947531 0007047
1768162_s_at	80.6335	black	0	IG_915271_915695-f	DEF=intergenic region
1769173_s_at	80.2561	black	0	IG_2475650_2475866-r	DEF=intergenic region
1765630_s_at	79.5996	black	0	IG_2997938_2998366-f	DEF=intergenic region
1760552_at	79.2741	black	945253	b0649	DEF=orf, hypothetical protein Hsc56 co-chaperone of HscC djlC 945253 0031072
1765107_s_at	79.1639	black	0	IG_89033_89633-r	DEF=intergenic region
1760868_s_at	79.0099	black	0	IG_3170228_3170545-r	DEF=intergenic region
1762118_s_at	79.0039	black	0	IG_1233941_1234160-f	DEF=intergenic region
1759120_s_at	78.9021	black	0	IG_728564_728805-r	DEF=intergenic region
1763067_s_at	78.8503	black	0	IG_2683528_2683854-f	DEF=intergenic region
1761041_at	78.7894	black	946649	b2118	DEF=putative regulator conserved protein yehI 946649
1759577_s_at	78.7307	black	0	IG_1236465_1236793-f	DEF=intergenic region
1767957_s_at	78.6388	black	946413	Z4079	DEF=orf; Unknown function putative electron transfer flavoprotein subunit ygcQ
1759810_s_at	78.5147	black	917010	b0612	DEF=YbdS citrate:succinate antiporter
1769161_s_at	78.5145	black	0	IG_1584511_1584843-f	DEF=intergenic region
1767793_s_at	78.505	black	0	IG_1608705_1608930-f	DEF=intergenic region
1766324_s_at	78.4962	black	916951	b0533	DEF=involved in fimbrial asembly SfmH
1762213_s_at	78.4738	black	0	IG_1062999_1063258-f	DEF=intergenic region
1768238_s_at	78.4014	black	0	IG_3267244_3267856-r	DEF=intergenic region
1764858_s_at	78.3032	black	915888	Z0665	DEF=orf; Unknown function allantoin permease
1759838_s_at	78.2655	black	0	IG_2492423_2492717-f	DEF=intergenic region
1766882_s_at	77.9678	black	1035462	c1683	DEF=Hypothetical protein hypothetical protein
1761892_s_at	77.9394	black	0	IG_545588_545903-f	DEF=intergenic region
1761959_s_at	77.8936	black	0	IG_531446_531674-r	DEF=intergenic region
1759322_at	77.6851	black	0	b3683	DEF=PTS system, arbutin-like IIC component
1768670_s_at	77.5384	black	0	IG_400148_400609-f	DEF=intergenic region
1764210_s_at	77.5364	black	947985	b3141	DEF=putative galactosamine-6-phosphate isomerase galactosamine-6-phosphate isomerase agaI 1040167 947985 959638 0005975
1760341_s_at	77.5332	black	0	IG_1292146_1292749-f	DEF=intergenic region
1760922_at	77.454	black	0	b0691	DEF=orf, hypothetical protein
1761912_s_at	77.3083	black	0	IG_1091513_1092098-f	DEF=intergenic region
1767916_s_at	77.2956	black	0	IG_2516252_2516471-f	DEF=intergenic region
1759229_s_at	77.2304	black	0	IG_2360232_2360450-r	DEF=intergenic region
1761006_s_at	77.2248	black	0	IG_3242382_3242743-f	DEF=intergenic region
1759285_s_at	77.2129	black	0	IG_2898371_2898613-r	DEF=intergenic region
1764629_s_at	77.061	black	0	IG_1006824_1007066-r	DEF=intergenic region
1762451_s_at	76.8003	black	0	IG_1218075_1218823-r	DEF=intergenic region
1764685_s_at	76.7552	black	0	IG_1257737_1258013-f	DEF=intergenic region
1764965_s_at	76.7047	black	0	IG_2288102_2288519-r	DEF=intergenic region
1759091_at	76.6625	black	945297	b0693	DEF=ornithine decarboxylase isozyme, inducible ornithine decarboxylase isozyme, inducible speF 945297 0006520
1768175_s_at	76.5861	black	1039412	c1153	DEF=Hypothetical protein hypothetical protein c1153 1039412
1764135_s_at	76.5588	black	0	IG_2925695_2926250-r	DEF=intergenic region
1766137_s_at	76.5251	black	917337	Z2176	DEF=orf, hypothetical protein hypothetical protein
1761106_s_at	76.5091	black	0	IG_3134387_3134677-r	DEF=intergenic region
1760942_s_at	76.4771	black	0	IG_253162_253466-r	DEF=intergenic region
1764836_s_at	76.4426	black	0	IG_1770310_1770529-r	DEF=intergenic region
1760427_s_at	76.4106	black	0	IG_1509434_1509677-r	DEF=intergenic region
1761293_s_at	76.4033	black	0	IG_1445308_1445539-r	DEF=intergenic region
1762398_s_at	76.176	black	0	IG_2141025_2141287-f	DEF=intergenic region
1760945_at	75.7769	black	4056040	b0371	DEF=orf, hypothetical protein pseudo yaiT 4056040
1759688_s_at	75.4857	black	0	IG_563704_563945-r	DEF=intergenic region
1759400_s_at	75.4488	black	916637	b2123	DEF=orf, hypothetical protein hypothetical protein
1763634_s_at	75.2547	black	0	IG_3666819_3667221-r	DEF=intergenic region
1768559_s_at	75.2237	black	0	IG_719684_720278-r	DEF=intergenic region
1765816_s_at	75.1269	black	0	IG_2135266_2135857-f	DEF=intergenic region
1764235_s_at	75.0748	black	0	IG_2212665_2212885-r	DEF=intergenic region
1764356_at	75.005	black	947831	b3332	DEF=putative export protein J general secretory pathway component, cryptic gspK 947831 0006810
1762963_s_at	75.0009	black	0	IG_1174389_1174649-f	DEF=intergenic region
1763977_s_at	74.9404	black	0	IG_1160775_1161107-r	DEF=intergenic region
1764130_s_at	74.9002	black	0	IG_238121_238745-r	DEF=intergenic region
1762481_s_at	74.7963	black	0	IG_556965_557401-f	DEF=intergenic region
1765324_s_at	74.7519	black	0	IG_2983618_2983868-f	DEF=intergenic region
1763010_at	74.4475	black	946934	b0940	DEF=putative outer membrane protein predicted outer membrane usher protein ycbS 946934 0006810
1767302_s_at	74.3408	black	0	IG_1577367_1577656-r	DEF=intergenic region
1761523_s_at	74.3024	black	0	IG_2460667_2461031-r	DEF=intergenic region
1759852_s_at	74.2012	black	0	IG_848135_848432-f	DEF=intergenic region
1760271_at	74.1426	black	946498	b1978	DEF=putative factor adhesin yeeJ 946498
1766054_s_at	73.8657	black	0	IG_2885243_2885600-r	DEF=intergenic region
1759155_s_at	73.8649	black	0	IG_996736_997081-r	DEF=intergenic region
1759680_s_at	73.4995	black	0	IG_2458979_2459319-f	DEF=intergenic region
1763064_s_at	73.3427	black	916950	b0532	DEF=putative outer membrane protein, export function putative outer membrane protein
1768744_s_at	73.1595	black	0	IG_3272549_3272922-f	DEF=intergenic region
1765508_s_at	73.0207	black	913405	b0013	DEF=orf, hypothetical protein hypothetical protein
1760546_s_at	72.8129	black	0	IG_2885243_2885600-f	DEF=intergenic region
1763272_s_at	72.7892	black	0	IG_3489935_3490204-f	DEF=intergenic region
1767602_at	72.7864	black	948094	b3576	DEF=putative lipase conserved protein yiaL 948094
1761119_s_at	72.4873	black	0	IG_3214133_3214419-f	DEF=intergenic region
1765447_s_at	72.3716	black	915242	b2484	DEF=hydrogenase 4 membrane subunit hydrogenase 4 subunit D
1766522_s_at	72.2765	black	0	IG_531446_531674-f	DEF=intergenic region
1767677_s_at	72.183	black	947238	b2771	DEF=putative transport protein predicted transporter
1763128_s_at	72.0894	black	0	IG_113220_113443-f	DEF=intergenic region
1763155_s_at	72.0003	black	0	IG_1118270_1118529-r	DEF=intergenic region
1759493_s_at	71.773	black	915245	b2482	DEF=hydrogenase 4 membrane subunit hydrogenase 4 subunit B
1768860_at	71.5419	black	1037385	c5330	DEF=Hypothetical protein hypothetical protein c5330 1037385
1766606_s_at	71.466	black	0	IG_3214133_3214419-r	DEF=intergenic region
1767584_s_at	71.33	black	0	IG_1694096_1694485-f	DEF=intergenic region
1765188_s_at	71.2125	black	914527	b0375	DEF=orf, hypothetical protein putative DNA-binding transcriptional regulator
1766797_s_at	71.1617	black	0	IG_2982147_2982432-f	DEF=intergenic region
1759447_s_at	71.1047	black	0	IG_3497253_3497495-r	DEF=intergenic region
1766586_s_at	71.1014	black	0	IG_1222152_1222917-f	DEF=intergenic region
1760607_s_at	71.0759	black	0	IG_3284667_3285066-f	DEF=intergenic region
1759367_at	71.0475	black	945110	b0717	DEF=putative chaperone predicted assembly protein ybgP 945110 0007047
1767781_s_at	71.0293	black	0	IG_3242382_3242743-r	DEF=intergenic region
1761204_at	70.3037	black	0	b2337	DEF=putative outer membrane protein
1767668_s_at	70.2939	black	1035484	c1702	DEF=Hypothetical protein hypothetical protein c1702 1035484
1767421_s_at	70.239	black	0	IG_230882_231121-r	DEF=intergenic region
1761462_s_at	70.1888	black	0	IG_2882162_2882575-r	DEF=intergenic region
1764287_s_at	70.1733	black	917274	b1470	DEF=orf, hypothetical protein hypothetical protein
1768695_at	70.154	black	944859	b0140	DEF=probable pilin chaperone similar to PapD predicted periplasmic pilin chaperone ecpD 944859 0006950
1766675_s_at	69.7707	black	914646	b2775	DEF=putative transport protein putative transport protein
1769057_s_at	69.6296	black	1038077	c2705	DEF=Hypothetical protein hypothetical protein c2705 1038077
1764368_s_at	69.4522	black	0	IG_1451667_1451950-f	DEF=intergenic region
1767082_s_at	69.3647	black	0	IG_3669525_3669971-f	DEF=intergenic region
1764078_s_at	69.3128	black	0	IG_3665211_3665420-f	DEF=intergenic region
1763613_at	69.2955	black	947890	b3380	DEF=putative mutase predicted mutase yhfW 947890 0008152
1766099_s_at	69.2709	black	0	IG_3716794_3717106-f	DEF=intergenic region
1765190_s_at	69.1625	black	0	IG_854968_855185-f	DEF=intergenic region
1769220_s_at	69.1541	black	0	IG_3375056_3375449-f	DEF=intergenic region
1767605_s_at	69.0846	black	0	IG_2055597_2056048-f	DEF=intergenic region
1763073_s_at	68.9914	black	914918	b2548	DEF=putative LACI-type transcriptional regulator putative LACI-type transcriptional regulator
1763458_s_at	68.9578	black	0	IG_1561101_1561357-f	DEF=intergenic region
1768542_s_at	68.9391	black	0	IG_2796517_2797184-f	DEF=intergenic region
1762365_s_at	68.6179	black	0	IG_996736_997081-f	DEF=intergenic region
1768236_at	68.5352	black	946779	b2334	DEF=orf, hypothetical protein predicted fimbrial-like adhesin protein yfcQ 946779 0009289
1768366_s_at	68.443	black	0	IG_1525177_1525913-r	DEF=intergenic region
1762013_s_at	68.1991	black	0	IG_2901397_2902768-f	DEF=intergenic region
1762082_s_at	68.0844	black	0	IG_3134387_3134677-f	DEF=intergenic region
1768503_s_at	68.0571	black	0	IG_3276307_3276554-f	DEF=intergenic region
1764244_s_at	67.8668	black	0	IG_556965_557401-r	DEF=intergenic region
1764645_s_at	67.7677	black	0	IG_2453667_2454346-f	DEF=intergenic region
1768789_s_at	67.5065	black	0	IG_2922538_2922756-f	DEF=intergenic region
1764246_at	67.4661	black	949099	b2355	DEF=putative RNA polymerase beta pseudo yfdL 949099
1763426_s_at	67.451	black	0	IG_1236465_1236793-r	DEF=intergenic region
1759766_s_at	67.41	black	0	IG_2363641_2363914-f	DEF=intergenic region
1765623_s_at	67.409	black	0	IG_641091_641310-f	DEF=intergenic region
1768242_s_at	67.3829	black	0	IG_2518693_2518950-f	DEF=intergenic region
1761435_s_at	67.2663	black	0	IG_2541549_2541851-f	DEF=intergenic region
1763917_s_at	67.2199	black	0	IG_2974408_2974620-r	DEF=intergenic region
1766009_s_at	67.1458	black	915246	b2481	DEF=hydrogenase 4 Fe-S subunit hydrogenase 4 Fe-S subunit
1762511_s_at	67.0745	black	917213	b1409	DEF=putative phosphatidate cytidiltransferase putative phosphatidate cytidiltransferase
1760734_s_at	66.8291	black	0	IG_146695_146967-r	DEF=intergenic region
1761799_s_at	66.6964	black	916149	b3121	DEF=orf, hypothetical protein hypothetical protein
1766988_at	66.6349	black	945325	b0719	DEF=putative fimbrial-like protein predicted fimbrial-like adhesin protein ybgD 945325 0007155
1765678_at	66.5948	black	948177	b3659	DEF=two-module transport protein predicted sugar efflux system setC 948177 0006810
1759330_at	66.4984	black	947468	b1001	DEF=orf, hypothetical protein predicted protein yccE 947468
1767884_s_at	66.3728	black	0	IG_3030836_3031084-r	DEF=intergenic region
1763529_at	66.3701	black	947529	b3046	DEF=putative membrane protein pseudo yqiG 947529
1761185_at	66.3314	black	947654	b3145	DEF=putative fimbrial protein predicted fimbrial-like adhesin protein yraK 947654 0009289
1760310_at	66.3048	black	944764	b2625	DEF=orf, hypothetical protein CP4-57 prophage; predicted protein yfjI 944764
1765429_s_at	66.1691	black	0	IG_1216220_1216508-r	DEF=intergenic region
1769036_s_at	65.92	black	0	IG_735443_736326-r	DEF=intergenic region
1759807_s_at	65.8738	black	912630	Z3167	DEF=orf; Unknown function hypothetical protein
1760177_s_at	65.8642	black	915230	b2491	DEF=putative 2-component regulator, interaction with sigma 54 putative 2-component regulator
1764031_s_at	65.799	black	916209	b3078	DEF=putative oxidoreductase putative oxidoreductase
1763779_s_at	65.7679	black	0	IG_1588026_1588380-f	DEF=intergenic region
1765479_s_at	65.5008	black	0	IG_2201932_2202549-r	DEF=intergenic region
1763844_s_at	65.3644	black	1036386	c2092	DEF=Hypothetical protein hypothetical protein c2092 1036386
1761560_s_at	65.338	black	0	IG_41932_42366-f	DEF=intergenic region
1760695_at	65.3177	black	947535	b3048	DEF=orf, hypothetical protein conserved protein yqiI 947535
1764926_s_at	65.2787	black	916204	b3080	DEF=putative isomerase putative glycosyl hydrolase
1760340_s_at	65.2599	black	912514	b1318	DEF=putative ATP-binding component of a transport system putative ATP-binding component of a transport system
1767492_s_at	65.0846	black	0	IG_2771114_2771338-f	DEF=intergenic region
1766230_s_at	64.9661	black	0	IG_2693564_2693958-r	DEF=intergenic region
1767832_at	64.9442	black	944740	b4308	DEF=putative frameshift suppressor pseudo yjhR 944740
1764564_s_at	64.909	black	912697	b1691	DEF=putative amino acidamine transport protein putative amino acid
1763358_at	64.8079	black	945983	b1407	DEF=orf, hypothetical protein predicted protein ydbD 945983
1763310_s_at	64.7528	black	0	IG_3043922_3044187-f	DEF=intergenic region
1761033_s_at	64.7271	black	0	IG_1120179_1120464-f	DEF=intergenic region
1763443_s_at	64.6558	black	0	IG_2714470_2714773-f	DEF=intergenic region
1765357_at	64.6192	black	948850	b4325	DEF=orf, hypothetical protein predicted protein yjiC 948850 0005515
1764936_s_at	64.4843	black	0	IG_2494586_2495076-r	DEF=intergenic region
1766572_s_at	64.4751	black	0	IG_1451667_1451950-r	DEF=intergenic region
1762556_s_at	64.4727	black	0	IG_1073235_1073464-r	DEF=intergenic region
1764856_s_at	64.3975	black	0	IG_1804108_1804393-f	DEF=intergenic region
1764406_s_at	64.266	black	0	IG_3117129_3117612-f	DEF=intergenic region
1762366_s_at	64.1984	black	0	IG_1434918_1435144-f	DEF=intergenic region
1769052_s_at	64.161	black	0	IG_2141025_2141287-r	DEF=intergenic region
1766167_at	64.1426	black	948017	b3504	DEF=orf, hypothetical protein pseudo yhiS 948017
1759948_s_at	64.1271	black	0	IG_1225304_1225822-r	DEF=intergenic region
1763694_s_at	64.091	black	0	IG_542258_542484-f	DEF=intergenic region
1759626_s_at	63.8427	black	0	IG_3232097_3232379-f	DEF=intergenic region
1760955_s_at	63.7692	black	0	IG_2854830_2855115-f	DEF=intergenic region
1762308_s_at	63.7413	black	946934	Z1288	DEF=partial fimbrial usher protein predicted outer membrane usher protein
1766759_s_at	63.6601	black	913666	b0117	DEF=putative membrane protein hypothetical protein
1766826_s_at	63.6596	black	947598	b3086	DEF=orf, hypothetical protein hypothetical protein
1763869_s_at	63.6579	black	0	IG_3537345_3537798-r	DEF=intergenic region
1767671_s_at	63.6339	black	0	IG_17007_17488-r	DEF=intergenic region
1765237_at	63.6202	black	948093	b3577	DEF=orf, hypothetical protein predicted transporter yiaM 948093 0006810
1768756_s_at	63.5564	black	912976	b1721	DEF=ankyrin repeat protein pseudo
1767083_s_at	63.4203	black	0	IG_3237188_3237583-r	DEF=intergenic region
1768933_s_at	63.3544	black	915244	b2483	DEF=hydrogenase 4 membrane subunit hydrogenase 4 membrane subunit
1765897_s_at	63.3395	black	915310	b1697	DEF=putative transport protein putative electron transfer flavoprotein YdiQ
1768571_s_at	63.2767	black	0	IG_3284667_3285066-r	DEF=intergenic region
1767472_s_at	63.2744	black	915229	b2492	DEF=probable formate transporter (formate channel 2) putative formate transporter
1768321_s_at	63.2647	black	0	IG_2566128_2566343-r	DEF=intergenic region
1761289_s_at	63.2199	black	0	IG_2385458_2385729-f	DEF=intergenic region
1765722_s_at	63.208	black	0	IG_3218889_3219106-r	DEF=intergenic region
1764781_s_at	63.1976	black	0	IG_3250310_3250550-r	DEF=intergenic region
1761623_s_at	63.0196	black	0	IG_829879_830094-r	DEF=intergenic region
1764514_s_at	62.9861	black	912660	b1692	DEF=putative oxidoreductase quinate
1760513_s_at	62.9301	black	0	IG_2848459_2848669-f	DEF=intergenic region
1760842_s_at	62.6287	black	0	IG_2522899_2523146-f	DEF=intergenic region
1765074_s_at	62.3902	black	0	IG_3638176_3638491-f	DEF=intergenic region
1763888_s_at	62.3769	black	0	IG_545588_545903-r	DEF=intergenic region
1767629_s_at	62.1731	black	0	IG_2063787_2064326-f	DEF=intergenic region
1759655_s_at	62.1688	black	0	IG_1616933_1617200-f	DEF=intergenic region
1761890_s_at	62.1396	black	0	IG_1570070_1570430-r	DEF=intergenic region
1759908_s_at	62.0444	black	0	IG_2693564_2693958-f	DEF=intergenic region
1762129_s_at	62.0034	black	0	IG_1542085_1542407-f	DEF=intergenic region
1765124_s_at	61.9482	black	916144	b3144	DEF=putative outer membrane protein putative outer membrane protein
1762505_s_at	61.7438	black	0	IG_3415775_3416026-f	DEF=intergenic region
1767760_s_at	61.7407	black	0	IG_2618920_2619216-r	DEF=intergenic region
1767001_s_at	61.6733	black	0	IG_3411103_3411500-f	DEF=intergenic region
1760537_s_at	61.6301	black	0	IG_3595192_3595614-r	DEF=intergenic region
1768014_s_at	61.6129	black	0	IG_3255598_3255927-f	DEF=intergenic region
1765788_s_at	61.5843	black	0	IG_2050037_2050297-f	DEF=intergenic region
1762101_s_at	61.5488	black	0	IG_2257317_2257738-f	DEF=intergenic region
1763343_s_at	61.537	black	0	IG_944781_945093-f	DEF=intergenic region
1768277_s_at	61.5079	black	0	IG_1986022_1986244-f	DEF=intergenic region
1763910_s_at	61.4226	black	944820	Z2618	DEF=orf; Unknown function putative outer membrane porin protein
1769180_s_at	61.2504	black	0	IG_1218075_1218823-f	DEF=intergenic region
1759710_at	61.2443	black	945249	b0645	DEF=orf, hypothetical protein predicted protein ybeR 945249
1767057_s_at	61.1885	black	0	IG_1588026_1588380-r	DEF=intergenic region
1763377_s_at	61.1556	black	0	IG_2350395_2350666-f	DEF=intergenic region
1765691_s_at	61.0015	black	916820	b2229	DEF=orf, hypothetical protein hypothetical protein
1767985_at	60.9483	black	947185	b0941	DEF=FimH-like protein predicted fimbrial-like adhesin protein ycbT 947185 0009289
1764045_at	60.9415	black	945146	b0509	DEF=putative oxidoreductase tartronate semialdehyde reductase, NADH-dependent glxR 945146 0006098
1761721_s_at	60.8983	black	0	IG_2974408_2974620-f	DEF=intergenic region
1769165_at	60.8793	black	946537	b0718	DEF=putative outer membrane protein predicted outer membrane protein ybgQ 946537 0006810
1759241_at	60.8029	black	947550	b0716	DEF=orf, hypothetical protein predicted fimbrial-like adhesin protein ybgO 947550
1764422_s_at	60.7853	black	917605	b0787	DEF=orf, hypothetical protein hypothetical protein
1767787_s_at	60.6475	black	0	IG_383694_384398-f	DEF=intergenic region
1763173_s_at	60.587	black	916051	b3227	DEF=putative transport protein predicted transporter
1763689_s_at	60.5726	black	947833	b3330	DEF=putative export protein H general secretory pathway component, cryptic
1768885_at	60.4306	black	947159	b2070	DEF=putative chaperonin conserved protein yegI 947159 0005622
1768992_s_at	60.2067	black	914917	b2547	DEF=putative ATP-binding component of a transport system putative ATP-binding component of a transport system
1766648_s_at	60.1782	black	913622	b4338	DEF=orf, hypothetical protein hypothetical protein
1761859_s_at	60.1461	black	0	IG_2697944_2698637-r	DEF=intergenic region
1766152_s_at	59.9509	black	0	IG_641091_641310-r	DEF=intergenic region
1766510_s_at	59.8316	black	0	IG_3416249_3416785-f	DEF=intergenic region
1768999_at	59.735	black	946878	b2407	DEF=xanthosine phosphorylase purine nucleoside phosphorylase II xapA 946878 0006139
1760542_s_at	59.5888	black	914272	b4080	DEF=putative enzyme putative outer membrane efflux protein MdtP
1762222_s_at	59.5377	black	916370	b2930	DEF=orf, hypothetical protein fructose-1,6-bisphosphatase II-like protein
1763577_s_at	59.3382	black	916183	b3104	DEF=putative cytochrome putative cytochrome
1764220_s_at	59.227	black	0	IG_3249651_3249943-f	DEF=intergenic region
1767614_s_at	59.2125	black	0	IG_2651360_2651874-f	DEF=intergenic region
1764994_s_at	59.1403	black	916140	b3138	DEF=PTS system, cytoplasmic, N-acetylgalactosamine-specific IIB component 1 (EIIB-AGA) N-acetylgalactosamine-specific PTS system transporter subunit IIB
1766517_s_at	59.0603	black	916947	b0530	DEF=putative fimbrial-like protein putative fimbrial-like protein
1768450_s_at	59.0544	black	0	IG_1956157_1956543-f	DEF=intergenic region
1765705_s_at	58.8858	black	0	IG_1762411_1762736-f	DEF=intergenic region
1768952_s_at	58.831	black	957025	Z0273	DEF=orf; Unknown function hypothetical protein Z0273 957025
1768986_s_at	58.7761	black	962038	Z3136	DEF=orf; Unknown function hypothetical protein Z3136 962038
1769037_at	58.7459	black	946868	b2406	DEF=xanthosine permease xanthosine transporter xapB 946868 0006810
1763624_s_at	58.6925	black	912526	b1316	DEF=orf, hypothetical protein hypothetical protein
1766422_s_at	58.5008	black	916371	b2932	DEF=orf, hypothetical protein putative oxidoreductase
1759283_s_at	58.4854	black	0	IG_1494656_1494879-r	DEF=intergenic region
1766666_s_at	58.4218	black	1037470	c5270	DEF=Hypothetical protein hypothetical protein
1762223_s_at	58.1958	black	1039960	c3811	DEF=Hypothetical protein hypothetical protein c3811 1039960
1761719_s_at	58.0767	black	0	IG_1823650_1823978-f	DEF=intergenic region
1767259_s_at	58.0673	black	0	IG_237008_237334-r	DEF=intergenic region
1766801_at	58.0573	black	947112	b2626	DEF=orf, hypothetical protein CP4-57 prophage; predicted protein yfjJ 947112 0005515
1761085_at	57.9818	black	946266	b1734	DEF=phospho-beta-glucosidase; cryptic cryptic phospho-beta-glucosidase, NAD(P)-binding chbF 946266 0005975
1762664_s_at	57.886	black	915434	b3664	DEF=orf, hypothetical protein hypothetical protein
1765350_s_at	57.8131	black	0	IG_582284_582903-f	DEF=intergenic region
1762128_s_at	57.7441	black	916629	Z3288	DEF=orf; Unknown function hypothetical protein
1759947_s_at	57.5656	black	0	IG_3345880_3346092-r	DEF=intergenic region
1760307_s_at	57.3662	black	1038643	c2993	DEF=Hypothetical protein hypothetical protein c2993 1038643
1762006_s_at	57.3238	black	0	IG_1596111_1596640-r	DEF=intergenic region
1761734_s_at	57.2867	black	961189	Z4906	DEF=orf; Unknown function hypothetical protein
1764249_at	57.2495	black	945247	b2778	DEF=orf, hypothetical protein predicted protein ygcG 945247 0005886
1764469_s_at	57.2407	black	0	IG_2506263_2506480-f	DEF=intergenic region
1764344_s_at	57.0844	black	915783	b0508	DEF=glyoxylate-induced protein hydroxypyruvate isomerase
1760523_s_at	57.0495	black	916422	b2887	DEF=putative oxidoreductase, Fe-S subunit putative oxidoreductase Fe-S binding subunit
1766592_s_at	57.0314	black	0	IG_1619063_1619355-f	DEF=intergenic region
1767869_s_at	56.9653	black	0	IG_2943865_2944102-f	DEF=intergenic region
1763764_s_at	56.9551	black	0	IG_706981_707556-f	DEF=intergenic region
1765649_s_at	56.9509	black	0	IG_1255176_1255943-r	DEF=intergenic region
1766732_s_at	56.8014	black	0	IG_3085880_3086302-f	DEF=intergenic region
1761879_s_at	56.7211	black	1039439	c3526	DEF=Hypothetical protein hypothetical protein c3526 1039439
1763745_s_at	56.6915	black	917778	b0943	DEF=putative fimbrial-like protein putative fimbrial-like protein
1766661_at	56.6349	black	948092	b3578	DEF=putative membrane protein predicted transporter yiaN 948092 0006810
1762823_s_at	56.5058	black	0	IG_1752502_1752955-r	DEF=intergenic region
1760683_s_at	56.4412	black	0	IG_510604_510864-f	DEF=intergenic region
1762641_at	56.4406	black	945245	b0646	DEF=putative enzyme of polynucleotide modification predicted chaperone djlB 945245 0031072
1760591_s_at	56.3089	black	0	IG_2931711_2932256-f	DEF=intergenic region
1764859_s_at	56.1275	black	916758	b2162	DEF=hypothetical protein ribonucleoside hydrolase 2 rihB 916758 946646 957121 0006206
1765924_s_at	56.0852	black	0	IG_2522899_2523146-r	DEF=intergenic region
1763474_s_at	55.9927	black	0	IG_2317849_2318062-f	DEF=intergenic region
1768941_s_at	55.9223	black	0	IG_1744152_1744458-r	DEF=intergenic region
1765328_s_at	55.8722	black	0	IG_3372125_3372503-f	DEF=intergenic region
1765463_s_at	55.8432	black	0	IG_698401_698796-f	DEF=intergenic region
1767828_s_at	55.7692	black	0	IG_3650829_3651557-f	DEF=intergenic region
1767526_s_at	55.7502	black	0	IG_1570070_1570430-f	DEF=intergenic region
1759477_s_at	55.5771	black	916838	Z3503	DEF=orf, hypothetical protein putative aldolase
1766068_at	55.4382	black	944819	b0139	DEF=probable outer membrane porin protein involved in fimbrial assembly predicted outer membrane usher protein htrE 944819 0006810
1760032_s_at	55.4119	black	0	IG_3192542_3192766-f	DEF=intergenic region
1764502_s_at	55.3811	black	915413	b3684	DEF=putative transcriptional regulator putative transcriptional regulator
1760628_s_at	55.3411	black	0	IG_2931711_2932256-r	DEF=intergenic region
1766207_at	55.2373	black	946644	b0218	DEF=orf, hypothetical protein pseudo yafU 946644
1764548_s_at	55.1807	black	915742	b3520	DEF=putative regulator putative regulator
1759966_s_at	55.1579	black	0	IG_563704_563945-f	DEF=intergenic region
1767172_s_at	54.9273	black	0	IG_1521090_1521330-r	DEF=intergenic region
1769113_s_at	54.8455	black	947832	b3331	DEF=putative export protein I predicted general secretory pathway component, cryptic
1761608_s_at	54.776	black	0	IG_2915836_2916066-r	DEF=intergenic region
1759071_s_at	54.723	black	913938	b2503	DEF=putative cytochrome C-type biogenesis protein putative cytochrome C-type biogenesis protein
1762799_at	54.5645	black	947889	b3381	DEF=orf, hypothetical protein predicted amino acid racemase yhfX 947889
1767818_s_at	54.5521	black	0	IG_2362317_2362573-r	DEF=intergenic region
1760687_s_at	54.4502	black	914024	c5274	DEF=Hypothetical protein yjfC putative synthetase
1760475_s_at	54.3935	black	0	IG_3630221_3630481-r	DEF=intergenic region
1759380_s_at	54.3038	black	0	IG_1229624_1229989-f	DEF=intergenic region
1769093_s_at	54.1967	black	0	IG_2516252_2516471-r	DEF=intergenic region
1761615_s_at	54.1372	black	0	IG_815871_816266-r	DEF=intergenic region
1760001_s_at	54.0885	black	0	IG_944781_945093-r	DEF=intergenic region
1762197_s_at	54.0462	black	915414	b3682	DEF=PTS system, arbutin-like IIB component PTS system arbutin-like IIC component
1768655_s_at	53.9493	black	958196	Z4042	DEF=orf; Unknown function hypothetical protein Z4042 958196
1764171_s_at	53.9297	black	0	IG_1630310_1631062-f	DEF=intergenic region
1766601_s_at	53.9103	black	0	IG_3467491_3467781-f	DEF=intergenic region
1768906_s_at	53.8968	black	0	IG_882612_882895-f	DEF=intergenic region
1765998_s_at	53.8948	black	0	IG_3228881_3229305-r	DEF=intergenic region
1759469_s_at	53.8476	black	0	IG_3077350_3077662-f	DEF=intergenic region
1768116_s_at	53.8299	black	0	IG_3666819_3667221-f	DEF=intergenic region
1760769_s_at	53.7715	black	0	IG_1565165_1565527-f	DEF=intergenic region
1760078_s_at	53.7284	black	0	IG_3372125_3372503-r	DEF=intergenic region
1766910_at	53.6436	black	946743	b2270	DEF=orf, hypothetical protein conserved protein yfbK 946743 0005515
1765521_s_at	53.6101	black	0	IG_2985099_2985497-f	DEF=intergenic region
1762098_s_at	53.4229	black	947701	b2981	DEF=orf, hypothetical protein hypothetical protein
1761410_s_at	53.396	black	912611	b1873	DEF=putative cytochrome C-type protein putative cytochrome C-type protein
1766143_s_at	53.3068	black	0	IG_1621875_1622128-f	DEF=intergenic region
1761870_s_at	53.2125	black	0	IG_528355_528868-r	DEF=intergenic region
1760099_s_at	53.1913	black	916844	b2248	DEF=putative regulator putative regulator
1763792_at	53.0879	black	947891	b3379	DEF=putative hydrolase predicted hydrolase php 947891 0009056
1760232_s_at	53.0543	black	916437	b2873	DEF=orf, hypothetical protein dihydropyrimidinase
1766124_s_at	53.0063	black	0	IG_1020143_1020360-r	DEF=intergenic region
1766811_s_at	52.9481	black	916948	b0531	DEF=putative chaperone putative chaperone
1763875_s_at	52.8901	black	0	IG_2190817_2191078-f	DEF=intergenic region
1765379_s_at	52.8306	black	915236	b2489	DEF=hydrogenase 4 Fe-S subunit hydrogenase 4 Fe-S subunit
1760162_at	52.8189	black	1038743	c5073	DEF=Hypothetical protein hypothetical protein c5073 1038743
1767129_s_at	52.747	black	0	IG_400148_400609-r	DEF=intergenic region
1759417_at	52.6713	black	944933	b4017	DEF=Arp ankyrin repeat protein, function unknown arpA 944933
1760681_s_at	52.298	black	0	IG_2882162_2882575-f	DEF=intergenic region
1764544_at	52.1783	black	1037474	c4391	DEF=Hypothetical protein hypothetical protein c4391 1037474
1767018_s_at	52.0344	black	0	IG_1906791_1907331-r	DEF=intergenic region
1761517_s_at	51.96	black	0	IG_3650829_3651557-r	DEF=intergenic region
1759159_s_at	51.9314	black	916418	b2885	DEF=putative oxidoreductase putative oxidoreductase
1759274_s_at	51.9092	black	0	IG_2997938_2998366-r	DEF=intergenic region
1761965_s_at	51.9058	black	914046	b1690	DEF=putative transport system permease protein putative transport system permease protein
1760014_at	51.8773	black	2847704	b1934	DEF=orf, hypothetical protein pseudo yedN 2847704
1761242_s_at	51.7612	black	958386	Z3767	DEF=orf; Unknown function hypothetical protein
1760047_at	51.7296	black	946758	b2624	DEF=prophage CP4-57 regulatory protein alpA CP4-57 prophage; DNA-binding transcriptional activator alpA 946758 0006350
1767138_s_at	51.5906	black	913018	b3678	DEF=putative sulfatase putative sulfatase
1762669_at	51.3505	black	946819	b2345	DEF=orf, hypothetical protein predicted protein yfdF 946819
1763789_s_at	51.2509	black	0	IG_1616933_1617200-r	DEF=intergenic region
1764143_s_at	51.0577	black	916953	b0534	DEF=putative fimbrial-like protein putative fimbrial protein
1765672_s_at	50.9843	black	916395	b2918	DEF=putative nucleotide-binding protein membrane ATPase
1760718_s_at	50.9343	black	917208	b1408	DEF=hypothetical protein putative enzyme
1764924_at	50.9224	black	948576	b4066	DEF=orf, hypothetical protein conserved protein yjcF 948576
1761416_s_at	50.892	black	0	IG_1164909_1165307-f	DEF=intergenic region
1768035_at	50.8726	black	945832	b2271	DEF=putative aminopeptidase predicted peptidase yfbL 945832 0006508
1768797_s_at	50.862	black	947951	b3443	DEF=orf, hypothetical protein hypothetical protein
1759586_at	50.8409	black	1040033	c4605	DEF=Hypothetical protein hypothetical protein c4605 1040033
1763415_s_at	50.8035	black	0	IG_1212331_1212550-f	DEF=intergenic region
1760154_s_at	50.7886	black	917031	b1698	DEF=putative flavoprotein electron transfer flavoprotein subunit YdiR
1762958_s_at	50.7366	black	946060	b1373	DEF=tail fiber assembly protein homolog from lambdoid prophage Rac Qin prophage; predicted tail fibre assembly protein
1761841_s_at	50.669	black	0	IG_156884_157252-f	DEF=intergenic region
1769264_s_at	50.597	black	0	IG_2781229_2781657-f	DEF=intergenic region
1760568_s_at	50.5902	black	916212	b3077	DEF=evolved beta-D-galactosidase, beta subunit; cryptic gene cryptic beta-D-galactosidase subunit beta
1763993_s_at	50.5029	black	0	IG_2496316_2496690-f	DEF=intergenic region
1759124_s_at	50.4369	black	916729	b2138	DEF=putative channelfilament proteins multidrug resistance outer membrane protein MdtQ
1764611_at	50.4031	black	947312	b1471	DEF=putative glycoportein pseudo yddK 947312
1768167_at	50.3538	black	945738	b1168	DEF=putative proteases conserved inner membrane protein ycgG 945738
1765197_s_at	50.1844	black	917000	b0602	DEF=orf, hypothetical protein hypothetical protein
1766509_s_at	50.088	black	1037455	c5286	DEF=Hypothetical protein hypothetical protein c5286 1037455
1764816_s_at	50.0549	black	0	IG_877259_877470-f	DEF=intergenic region
1760615_s_at	49.9362	black	0	IG_1790045_1790290-f	DEF=intergenic region
1762081_s_at	49.898	black	0	IG_1091513_1092098-r	DEF=intergenic region
1765785_at	49.8954	black	947883	b3377	DEF=putative transport system permease protein predicted inner membrane protein yhfT 947883 0005886
1759289_s_at	49.8448	black	912626	b1311	DEF=putative binding-protein dependent transport protein putative binding-protein dependent transport protein
1762844_s_at	49.7827	black	0	IG_899799_900088-f	DEF=intergenic region
1768581_s_at	49.7611	black	0	IG_1020143_1020360-f	DEF=intergenic region
1769026_s_at	49.7107	black	0	IG_2848459_2848669-r	DEF=intergenic region
1764884_at	49.6506	black	1450268	b2338	DEF=putative outer membrane protein pseudo yfcU 1450268
1760835_s_at	49.6303	black	0	IG_1599266_1599513-r	DEF=intergenic region
1764620_s_at	49.5112	black	0	IG_2773043_2773939-f	DEF=intergenic region
1769266_s_at	49.5107	black	0	IG_1581984_1582230-f	DEF=intergenic region
1760496_s_at	49.4441	black	915619	c4382	DEF=Hypothetical protein yiaA hypothetical protein
1761987_s_at	49.4417	black	0	IG_2898371_2898613-f	DEF=intergenic region
1763498_s_at	49.3119	black	0	IG_2783373_2783781-f	DEF=intergenic region
1767264_s_at	49.2579	black	1040423	c0161	DEF=Hypothetical protein hypothetical protein c0161 1040423
1762064_s_at	49.2289	black	948582	b4081	DEF=putative enzyme predicted multidrug efflux system component
1768773_s_at	49.1802	black	0	IG_2874353_2874603-f	DEF=intergenic region
1759470_s_at	49.1194	black	948234	b3721	DEF=phospho-beta-glucosidase B; cryptic 6-phospho-beta-glucosidase bglB
1768058_s_at	48.9929	black	947021	b2549	DEF=orf, hypothetical protein hypothetical protein
1767564_s_at	48.9884	black	914358	b0235	DEF=orf, hypothetical protein hypothetical protein
1763326_s_at	48.9154	black	947208	b2740	DEF=putative transport protein inner membrane permease YgbN
1760824_s_at	48.8022	black	913539	b1862	DEF=orf, hypothetical protein hypothetical protein
1762974_s_at	48.7666	black	917061	b1730	DEF=orf, hypothetical protein hypothetical protein
1759592_s_at	48.621	black	0	IG_2475650_2475866-f	DEF=intergenic region
1763395_s_at	48.6115	black	0	IG_1588561_1588877-r	DEF=intergenic region
1764421_s_at	48.5313	black	0	IG_3030836_3031084-f	DEF=intergenic region
1768635_s_at	48.4677	black	946651	Z3293	DEF=orf; Unknown function hypothetical protein
1767232_at	48.4113	black	4056033	b4276	DEF=orf, hypothetical protein pseudo yjgX 4056033
1766162_s_at	48.4035	black	916837	b2244	DEF=orf, hypothetical protein hypothetical protein
1765085_s_at	48.3048	black	0	IG_2967000_2967683-f	DEF=intergenic region
1763398_at	48.2233	black	946872	b2408	DEF=putative sugar hydrolase conserved outer membrane protein yfeN 946872 0009279
1767773_s_at	48.2186	black	1037946	c2624	DEF=Hypothetical protein hypothetical protein c2624 1037946
1760028_s_at	48.1885	black	1038167	c2748	DEF=Hypothetical protein hypothetical protein c2748 1038167
1768519_s_at	48.1547	black	2693802	ECs5484	DEF=hypothetical protein hypothetical protein ECs5484 2693802
1762276_s_at	48.1238	black	0	IG_3228881_3229305-f	DEF=intergenic region
1762382_s_at	48.0454	black	916842	ECs3134	DEF=hypothetical protein hypothetical protein
1765877_s_at	47.9707	black	0	IG_2903441_2903663-r	DEF=intergenic region
1760153_at	47.9386	black	948091	b3579	DEF=putative solute-binding transport protein predicted transporter yiaO 948091 0006810
1760610_s_at	47.9173	black	915890	c4188	DEF=Hypothetical protein yhgA hypothetical protein
1766105_s_at	47.9127	black	0	IG_2301518_2301924-r	DEF=intergenic region
1768031_s_at	47.8697	black	0	IG_3161498_3161730-f	DEF=intergenic region
1765051_s_at	47.7428	black	947652	Z4493	DEF=PTS system N-acetylgalactosamine-specific IIC component 1 N-acetylgalactosamine-specific PTS system transporter subunit IIC
1765906_s_at	47.7148	black	0	IG_1311688_1312043-f	DEF=intergenic region
1766409_s_at	47.682	black	0	IG_2598969_2599181-r	DEF=intergenic region
1766118_s_at	47.6189	black	916921	b1616	DEF=glucuronide permease glucuronide transporter
1759436_at	47.6025	black	1037721	c5132	DEF=Hypothetical protein hypothetical protein c5132 1037721
1765268_s_at	47.547	black	0	IG_1596111_1596640-f	DEF=intergenic region
1762783_s_at	47.436	black	0	IG_2823600_2823854-f	DEF=intergenic region
1767549_s_at	47.4352	black	0	IG_3279267_3279616-f	DEF=intergenic region
1768940_s_at	47.3517	black	0	IG_479933_480477-r	DEF=intergenic region
1761205_s_at	47.3488	black	0	IG_2267588_2267998-r	DEF=intergenic region
1765677_s_at	47.3015	black	0	IG_2837291_2837546-r	DEF=intergenic region
1767645_s_at	47.2447	black	0	b0012	DEF=positive regulator for sigma 32 heat shock promoters
1767139_s_at	47.2336	black	0	IG_1525177_1525913-f	DEF=intergenic region
1762519_s_at	47.2167	black	917229	b1425	DEF=orf, hypothetical protein hypothetical protein
1761537_at	47.1736	black	945761	b1196	DEF=orf, hypothetical protein predicted protein ycgY 945761
1767621_s_at	47.1713	black	0	IG_2566128_2566343-f	DEF=intergenic region
1764456_s_at	47.1357	black	0	IG_1864497_1864931-r	DEF=intergenic region
1759407_s_at	47.1059	black	916107	b3173	DEF=putative alkaline phosphatase I putative alkaline phosphatase I
1768336_s_at	47.0594	black	1035524	c1740	DEF=Hypothetical protein hypothetical protein c1740 1035524
1764917_s_at	46.9435	black	1038040	c2686	DEF=Hypothetical protein hypothetical protein c2686 1038040
1765746_s_at	46.9278	black	947310	b2984	DEF=orf, hypothetical protein ATP-binding protein yghR
1764417_at	46.7457	black	948630	b2647	DEF=putative ATP-binding component of a transport system adhesin-like autotransporter ypjA 948630 0007155
1759200_s_at	46.6949	black	0	IG_2889922_2890236-f	DEF=intergenic region
1762073_at	46.6586	black	946853	b2385	DEF=putative peptidase predicted peptidase ypdF 946853 0006508
1764616_s_at	46.6523	black	0	IG_1269147_1269460-r	DEF=intergenic region
1764377_at	46.5823	black	946818	b2335	DEF=putative fimbrial protein predicted fimbrial-like adhesin protein yfcR 946818
1764941_at	46.509	black	2847726	b2116	DEF=molybdate metabolism regulator, second fragment 2 pseudo yehH 2847726
1769075_s_at	46.491	black	0	IG_2050037_2050297-r	DEF=intergenic region
1761645_s_at	46.4766	black	913621	b0106	DEF=putative integral membrane protein involved in biogenesis of fimbriae, protein transport, DNA uptake type IV pilin biogenesis protein
1764245_s_at	46.439	black	916819	b2227	DEF=orf, hypothetical protein hypothetical protein
1768240_at	46.2895	black	947126	b2643	DEF=orf, hypothetical protein CP4-57 prophage; predicted antirestriction protein yfjX 947126
1769126_at	46.2632	black	946788	b2333	DEF=putative fimbrial-like protein predicted fimbrial-like adhesin protein yfcP 946788 0007155
1763515_s_at	46.2033	black	0	IG_2765377_2765724-r	DEF=intergenic region
1765961_s_at	46.1658	black	0	IG_1341353_1341620-f	DEF=intergenic region
1759391_s_at	46.1244	black	0	IG_3713910_3714175-f	DEF=intergenic region
1768360_at	46.1137	black	949109	b2339	DEF=putative fimbrial-like protein predicted fimbrial-like adhesin protein yfcV 949109 0007155
1760243_s_at	46.0924	black	0	IG_502463_502699-r	DEF=intergenic region
1759712_at	46.0619	black	915003	ECs4876	DEF=hypothetical protein hypothetical protein
1761894_s_at	46.0233	black	0	IG_1993383_1993840-f	DEF=intergenic region
1763927_s_at	45.9496	black	1039194	c3354	DEF=Hypothetical protein hypothetical protein c3354 1039194
1763944_at	45.7636	black	947928	b3422	DEF=sigma54-dependent regulator of rtcBA expression sigma 54-dependent transcriptional regulator of rtcBA expression rtcR 947928 0000160
1766353_s_at	45.763	black	0	IG_1064516_1064807-r	DEF=intergenic region
1760338_s_at	45.746	black	0	IG_1542085_1542407-r	DEF=intergenic region
1763437_s_at	45.7274	black	0	IG_1599266_1599513-f	DEF=intergenic region
1766567_s_at	45.725	black	916141	c3897	DEF=PTS system, N-acetylgalactosamine-specific IID component N-acetylgalactosamine-specific PTS system transporter subunit IID
1759233_at	45.5819	black	944899	b0227	DEF=putative lipoprotein predicted lipoprotein and C40 family peptidase yafL 944899 0005886
1765546_s_at	45.5695	black	0	IG_1293368_1293648-r	DEF=intergenic region
1765088_s_at	45.5532	black	0	IG_2519349_2519612-f	DEF=intergenic region
1768960_s_at	45.4129	black	0	IG_3183982_3184202-r	DEF=intergenic region
1760045_s_at	45.3386	black	915238	b2487	DEF=hydrogenase 4 subunit hydrogenase 4 subunit
1760055_s_at	45.3222	black	916484	b2846	DEF=orf, hypothetical protein hypothetical protein
1762307_s_at	45.3182	black	947827	b3328	DEF=putative general protein secretion protein pseudopilin, cryptic, general secretion pathway
1767862_s_at	45.3147	black	0	IG_1694096_1694485-r	DEF=intergenic region
1763854_s_at	45.2002	black	0	IG_1308294_1308592-f	DEF=intergenic region
1763632_s_at	45.1969	black	945738	c1610	DEF=Conserved hypothetical protein hypothetical protein
1768611_at	45.0712	black	945897	b2969	DEF=putative general secretion pathway for protein export (GSP) pseudo yghE 945897
1763038_s_at	45.0538	black	0	IG_1580582_1580949-f	DEF=intergenic region
1769081_at	45.0362	black	944828	b0138	DEF=putative fimbrial-like protein predicted fimbrial-like adhesin protein yadM 944828 0007155
1760558_s_at	44.9999	black	916089	b0513	DEF=putative transport putative purine permease YbbY
1762522_s_at	44.909	black	916818	Z3480	DEF=orf; Unknown function hypothetical protein
1761657_s_at	44.8989	black	914275	b4082	DEF=putative membrane protein multidrug resistance protein MdtN
1766607_s_at	44.7711	black	913808	b4257	DEF=orf, hypothetical protein hypothetical protein
1761479_at	44.7679	black	947658	b3142	DEF=putative fimbrial-like protein predicted fimbrial-like adhesin protein yraH 947658 0007155
1768958_at	44.6907	black	946742	b2269	DEF=putative sulfatase phosphatase predicted enzyme elaD 946742 0006508
1764309_s_at	44.6384	black	912853	Z2825	DEF=orf, hypothetical protein hypothetical protein
1764038_s_at	44.5822	black	0	IG_2492423_2492717-r	DEF=intergenic region
1761948_s_at	44.5738	black	917769	Z1293	DEF=putative chaperone hypothetical protein
1764709_s_at	44.55	black	0	IG_3709637_3709864-r	DEF=intergenic region
1763778_s_at	44.5352	black	0	IG_450835_451293-f	DEF=intergenic region
1764265_s_at	44.5153	black	944781	b0132	DEF=orf, hypothetical protein hypothetical protein
1765444_s_at	44.4771	black	0	IG_2261516_2261882-r	DEF=intergenic region
1764721_s_at	44.4075	black	947768	Z4627	DEF=C-terminal fragment of integral transmembrane protein involved with acridine resistance acriflavin resistance protein F
1759201_s_at	44.0967	black	916226	b3063	DEF=orf, hypothetical protein hypothetical protein
1766842_at	44.0492	black	947127	b2633	DEF=orf, hypothetical protein CP4-57 prophage; predicted protein yfjQ 947127
1766559_s_at	44.0308	black	1035074	c1375	DEF=Hypothetical protein hypothetical protein c1375 1035074
1767693_s_at	43.9928	black	916071	b3587	DEF=orf, hypothetical protein hypothetical protein
1759737_s_at	43.9321	black	0	IG_3581812_3582389-r	DEF=intergenic region
1761769_s_at	43.8141	black	914999	c2090	DEF=Hypothetical protein ydiO putative acyl-CoA dehydrogenase
1766614_s_at	43.8029	black	916016	b3264	DEF=putative transcriptional regulator DNA-binding transcriptional regulator EnvR
1763381_s_at	43.7747	black	0	IG_1671526_1671936-f	DEF=intergenic region
1763431_at	43.7558	black	945355	b0731	DEF=protein modification enzyme, induction of ompC fused 2-O-a-mannosyl-D-glycerate specific PTS enzymes: IIA component
1766159_s_at	43.7304	black	0	IG_1642368_1642674-f	DEF=intergenic region
1764093_s_at	43.6688	black	1039371	c3478	DEF=Hypothetical protein hypothetical protein c3478 1039371
1763280_s_at	43.6515	black	917050	b0650	DEF=DnaK-like protein putative DnaK
1761749_s_at	43.6511	black	0	IG_542258_542484-r	DEF=intergenic region
1764301_s_at	43.6238	black	0	IG_1803018_1803348-r	DEF=intergenic region
1763332_s_at	43.619	black	915908	b3393	DEF=orf, hypothetical protein hypothetical protein
1765285_s_at	43.5889	black	915486	b0504	DEF=putative transcriptional regulator LYSR-type DNA-binding transcriptional activator of the allD operon
1764020_s_at	43.5782	black	1035202	c1478	DEF=Hypothetical protein hypothetical protein c1478 1035202
1765616_s_at	43.5219	black	914648	b2772	DEF=orf, hypothetical protein hypothetical protein
1765891_s_at	43.5134	black	0	IG_3632089_3632371-r	DEF=intergenic region
1768691_at	43.3998	black	947999	b3490	DEF=orf, hypothetical protein pseudo yhiL 947999
1766339_s_at	43.3227	black	948196	b3691	DEF=D-galactonate transport D-galactonate transporter dgoT 1040044 948196 0006810
1769029_s_at	43.3094	black	1035685	c1861	DEF=Hypothetical protein hypothetical protein c1861 1035685
1767328_at	43.2196	black	946617	b2109	DEF=putative outer membrane protein predicted outer membrane protein yehB 946617 0006810
1761524_s_at	43.1743	black	915507	b3657	DEF=putative permease putative transporter
1768879_s_at	43.1696	black	0	IG_522055_522484-r	DEF=intergenic region
1763172_s_at	43.0085	black	0	IG_2453667_2454346-r	DEF=intergenic region
1767687_s_at	42.9719	black	0	IG_131261_131614-f	DEF=intergenic region
1765303_at	42.8268	black	946101	b1553	DEF=orf, hypothetical protein Qin prophage; conserved protein ydfP 946101
1768675_s_at	42.8115	black	0	IG_2360232_2360450-f	DEF=intergenic region
1765619_s_at	42.792	black	0	IG_815871_816266-f	DEF=intergenic region
1768697_s_at	42.7128	black	917743	Z1259	DEF=orf, hypothetical protein hypothetical protein
1763734_s_at	42.7104	black	0	IG_2363641_2363914-r	DEF=intergenic region
1768170_at	42.6943	black	948101	b3580	DEF=L-xylulose kinase, cryptic L-xylulose kinase lyx 948101 0005975
1760588_s_at	42.6636	black	947477	b2986	DEF=orf, hypothetical protein ATP-binding protein yghT
1762477_s_at	42.6608	black	0	IG_3276307_3276554-r	DEF=intergenic region
1766749_s_at	42.651	black	0	IG_3581812_3582389-f	DEF=intergenic region
1768936_s_at	42.603	black	0	IG_829879_830094-f	DEF=intergenic region
1762782_at	42.5873	black	944908	b0229	DEF=flagellar biosynthesis pseudo lfhA 944908
1760360_s_at	42.4616	black	0	IG_2031525_2032042-f	DEF=intergenic region
1765849_s_at	42.457	black	0	IG_1096053_1096606-f	DEF=intergenic region
1759174_s_at	42.4534	black	915634	b2384	DEF=orf, hypothetical protein exoaminopeptidase
1767198_s_at	42.4159	black	0	IG_1588561_1588877-f	DEF=intergenic region
1769245_s_at	42.3685	black	946727	b2224	DEF=acetyl-CoA acetyltransferase Acetyl-CoA acetyltransferase atoB 1038272 946727 0006629
1759441_s_at	42.318	black	0	IG_259325_259611-r	DEF=intergenic region
1763913_at	42.2463	black	0	b3489	DEF=orf, hypothetical protein
1762421_s_at	42.164	black	916192	b3061	DEF=L-tartrate dehydratase, subunit A tartrate dehydratase subunit alpha
1764779_at	42.1396	black	947790	b1510	DEF=orf, hypothetical protein predicted lipoprotein ydeK 947790 0005886
1762250_s_at	41.9838	black	915630	b2387	DEF=putative PTS system enzyme IIB component putative PTS system IIB component ypdH
1765064_s_at	41.9569	black	914504	b0347	DEF=3-(3-hydroxyphenyl)propionate hydroxylase 3-(3-hydroxyphenyl)propionate hydroxylase
1762362_s_at	41.9324	black	916194	b3090	DEF=orf, hypothetical protein hypothetical protein
1764570_s_at	41.9218	black	946063	b1506	DEF=orf, hypothetical protein pseudo
1767242_s_at	41.8878	black	0	IG_3320147_3320373-f	DEF=intergenic region
1768572_s_at	41.7884	black	946652	b2121	DEF=orf, hypothetical protein hypothetical protein
1769172_s_at	41.7418	black	1038648	c1036	DEF=Hypothetical protein hypothetical protein c1036 1038648
1764580_s_at	41.7276	black	0	IG_1859357_1859725-f	DEF=intergenic region
1762015_s_at	41.6737	black	0	IG_2166389_2166733-r	DEF=intergenic region
1763769_s_at	41.607	black	917011	b0613	DEF=orf, hypothetical protein triphosphoribosyl-dephospho-CoA synthase
1763351_at	41.5924	black	0	b0690	DEF=orf, hypothetical protein
1761149_s_at	41.5636	black	0	IG_915271_915695-r	DEF=intergenic region
1760317_s_at	41.5608	black	0	IG_431238_431535-f	DEF=intergenic region
1769272_s_at	41.4867	black	0	IG_1545194_1545424-f	DEF=intergenic region
1766135_s_at	41.4432	black	0	IG_2986191_2986523-f	DEF=intergenic region
1759377_s_at	41.3331	black	0	IG_1630310_1631062-r	DEF=intergenic region
1763176_s_at	41.323	black	0	IG_2190243_2190534-f	DEF=intergenic region
1766907_s_at	41.2697	black	915070	c4850	DEF=Hypothetical protein yiiL hypothetical protein
1764228_at	41.2473	black	947537	b3051	DEF=putative membrane protein conserved protein yqiK 947537 0005886
1761282_s_at	41.2184	black	0	IG_2613902_2614113-r	DEF=intergenic region
1760448_s_at	41.1368	black	915598	b3584	DEF=putative outer membrane protein putative outer membrane protein
1768032_at	41.1134	black	947884	b3376	DEF=orf, hypothetical protein conserved protein yhfS 947884 0009058
1768040_s_at	41.0136	black	0	IG_253162_253466-f	DEF=intergenic region
1768010_s_at	40.9469	black	0	c3421	DEF=Hypothetical protein
1768981_s_at	40.9411	black	914537	b0385	DEF=orf, hypothetical protein predicted diguanylate cyclase
1764823_s_at	40.9055	black	0	IG_2460667_2461031-f	DEF=intergenic region
1766983_s_at	40.8511	black	0	IG_3319273_3319712-f	DEF=intergenic region
1765482_s_at	40.7596	black	0	IG_3208185_3208421-r	DEF=intergenic region
1759653_s_at	40.7306	black	913851	b4183	DEF=orf, hypothetical protein hypothetical protein
1766561_s_at	40.6934	black	0	IG_3071712_3071995-f	DEF=intergenic region
1766406_s_at	40.6514	black	0	IG_2573898_2574117-f	DEF=intergenic region
1767189_s_at	40.6234	black	914025	c5272	DEF=Hypothetical protein yjfM hypothetical protein
1767979_at	40.6153	black	946730	b2226	DEF=orf, hypothetical protein predicted protein yfaQ 946730
1763455_s_at	40.6074	black	0	IG_1565165_1565527-r	DEF=intergenic region
1761221_s_at	40.578	black	0	IG_2506263_2506480-r	DEF=intergenic region
1765446_s_at	40.4876	black	1037459	c5282	DEF=Hypothetical protein hypothetical protein c5282 1037459
1767256_s_at	40.4473	black	912960	b1979	DEF=orf, hypothetical protein hypothetical protein
1760163_s_at	40.3625	black	0	IG_780876_781307-r	DEF=intergenic region
1760902_s_at	40.3179	black	0	IG_1804108_1804393-r	DEF=intergenic region
1764482_s_at	40.2329	black	916069	b3586	DEF=putative membrane protein hypothetical protein
1763462_at	40.1932	black	948371	b3877	DEF=putative permease predicted transporter yihP 948371
1765651_s_at	40.1756	black	917046	b0647	DEF=orf, hypothetical protein hypothetical protein
1761883_s_at	40.1407	black	0	IG_1811169_1811444-f	DEF=intergenic region
1765055_s_at	40.0884	black	0	IG_3648293_3648920-r	DEF=intergenic region
1763214_at	40.0628	black	948804	b4277	DEF=orf, hypothetical protein KpLE2 phage-like element; predicted protein yjgZ 948804 0005515
1768368_s_at	39.9717	black	915911	b3391	DEF=putative transport portein outer membrane porin HofQ
1759613_s_at	39.7446	black	0	IG_3530078_3530455-r	DEF=intergenic region
1765125_s_at	39.7357	black	0	IG_2228406_2228643-r	DEF=intergenic region
1767265_s_at	39.6773	black	0	IG_2774890_2775135-f	DEF=intergenic region
1760102_s_at	39.652	black	916018	b3262	DEF=putative methyltransferase putative methyltransferase
1766895_s_at	39.3307	black	914766	b2654	DEF=orf, hypothetical protein hypothetical protein
1761370_at	39.2927	black	945595	b0993	DEF=TorS hybrid sensory histidine kinase in two-component regulatory system with TorR torS 945595 0000160
1768588_s_at	39.2828	black	0	IG_1554368_1554648-r	DEF=intergenic region
1769202_s_at	39.2496	black	1034989	c1294	DEF=Hypothetical protein hypothetical protein c1294 1034989
1760933_at	39.2434	black	1037775	c5129	DEF=Hypothetical protein hypothetical protein c5129 1037775
1768370_s_at	39.1687	black	915788	b3488	DEF=orf, hypothetical protein hypothetical protein
1767606_at	39.099	black	945274	b0689	DEF=putative pectinase predicted protein ybfP 945274 0005886
1767808_s_at	39.0084	black	944820	b1615	DEF=membrane-associated protein putative outer membrane porin protein
1762043_s_at	39.0067	black	0	IG_1550016_1550421-f	DEF=intergenic region
1764533_s_at	38.926	black	916472	b2851	DEF=orf, hypothetical protein hypothetical protein
1762032_s_at	38.803	black	947716	b2983	DEF=orf, hypothetical protein hypothetical protein
1763639_s_at	38.7801	black	912361	b1699	DEF=flavoprotein; probably electron transport hypothetical protein
1759651_s_at	38.735	black	947952	b3442	DEF=orf, hypothetical protein hypothetical protein
1769209_s_at	38.7271	black	0	IG_2065344_2066629-f	DEF=intergenic region
1766641_s_at	38.7073	black	0	IG_2753400_2753613-r	DEF=intergenic region
1759360_s_at	38.6877	black	0	IG_1488390_1488889-f	DEF=intergenic region
1767305_at	38.5928	black	0	b2651	DEF=orf, hypothetical protein
1759722_s_at	38.5749	black	946618	Z3483	DEF=orf, hypothetical protein hypothetical protein
1760918_s_at	38.5294	black	0	IG_584857_585369-r	DEF=intergenic region
1769006_s_at	38.5285	black	0	IG_1262724_1262936-r	DEF=intergenic region
1762681_at	38.4994	black	2847703	b1169	DEF=putative ATP-binding component of a transport system pseudo ycgH 2847703
1767320_s_at	38.4924	black	0	IG_848135_848432-r	DEF=intergenic region
1765978_s_at	38.4402	black	0	IG_769835_770677-f	DEF=intergenic region
1763740_at	38.2564	black	2847704	b1933	DEF=orf, hypothetical protein pseudo yedN 2847704
1766017_s_at	38.1656	black	946211	b1694	DEF=putative enzyme hypothetical protein
1761360_s_at	38.0836	black	0	IG_3632089_3632371-f	DEF=intergenic region
1766259_s_at	38.0547	black	0	IG_3265240_3265473-f	DEF=intergenic region
1759426_at	38.0513	black	947108	b2629	DEF=orf, hypothetical protein CP4-57 prophage; predicted protein yfjM 947108
1759627_s_at	37.9964	black	913304	c5269	DEF=Hypothetical protein hypothetical protein
1762039_at	37.882	black	948228	b3720	DEF=putative receptor protein carbohydrate-specific outer membrane porin, cryptic bglH 948228 0006810
1763156_s_at	37.8011	black	0	IG_3255598_3255927-r	DEF=intergenic region
1763328_at	37.6543	black	946830	b4300	DEF=putative DEOR-type transcriptional regulator KpLE2 phage-like element; predicted DNA-binding transcriptional regulator sgcR 946830 0006350
1761687_s_at	37.5675	black	948229	b3718	DEF=putative isomerase putative 6-phosphogluconolactonase
1767012_s_at	37.5033	black	0	IG_3672006_3672415-f	DEF=intergenic region
1766014_s_at	37.4754	black	956700	Z0039	DEF=orf; Unknown function hypothetical protein
1767866_s_at	37.3942	black	917043	Z0791	DEF=orf; Unknown function hypothetical protein
1766100_s_at	37.1956	black	0	IG_2874353_2874603-r	DEF=intergenic region
1766290_s_at	37.0291	black	0	IG_246503_246711-f	DEF=intergenic region
1767453_at	37.0137	black	2847685	b4449
1761181_at	36.8902	black	945002	b0164	DEF=orf, hypothetical protein predicted phosphatase yaeI 945002 0016787
1767692_s_at	36.8597	black	0	IG_1327137_1327355-f	DEF=intergenic region
1765386_s_at	36.8422	black	0	IG_3496839_3497084-r	DEF=intergenic region
1767355_s_at	36.8411	black	0	IG_2755422_2755664-f	DEF=intergenic region
1768730_s_at	36.7544	black	1037392	c4374	DEF=Hypothetical protein hypothetical protein c4374 1037392
1761407_s_at	36.7347	black	916373	b2933	DEF=PTS system, mannitol-specific enzyme II component, cryptic PTS system, mannitol (Cryptic)-specific IIBC component
1766506_s_at	36.7301	black	915293	c4687	DEF=Hypothetical protein yifB putative ATP-dependent protease
1768484_s_at	36.7025	black	914766	b2655	DEF=orf, hypothetical protein hypothetical protein
1760909_s_at	36.613	black	1035807	c1905	DEF=Hypothetical protein hypothetical protein c1905 1035807
1767855_s_at	36.5231	black	916372	b2934	DEF=PTS system, mannitol-specific enzyme II component, cryptic putative mannitol phosphotransferase subunit EIIA
1766316_s_at	36.5205	black	913403	b0011	DEF=putative oxidoreductase hypothetical protein
1768505_at	36.4546	black	945380	b0771	DEF=putative enzyme predicted hydratase ybhJ 945380 0008152
1764553_s_at	36.4407	black	0	IG_651167_651457-r	DEF=intergenic region
1765343_s_at	36.3619	black	0	IG_131261_131614-r	DEF=intergenic region
1768448_s_at	36.3306	black	0	IG_1246600_1246918-f	DEF=intergenic region
1762712_s_at	36.3102	black	0	IG_3420831_3421058-f	DEF=intergenic region
1765391_s_at	36.2976	black	915770	Z0661	DEF=glyoxylate carboligase glyoxylate carboligase
1763408_s_at	36.2498	black	947985	Z4495	DEF=putative galactosamine-6-phosphate isomerase galactosamine-6-phosphate isomerase agaI 1040167 947985 959638 0005975
1763011_at	36.1611	black	948810	b4282	DEF=orf, hypothetical protein pseudo yjhE 948810
1765101_at	36.1434	black	948344	b3818	DEF=orf, hypothetical protein predicted inner membrane protein yigG 948344 0005886
1764459_at	36.1259	black	945668	b2636	DEF=orf, hypothetical protein CP4-57 prophage; predicted protein yfjS 945668 0005886
1759633_at	36.106	black	946654	b2122	DEF=orf, hypothetical protein pseudo yehQ 946654
1764137_s_at	35.485	black	912443	ECs2704	DEF=hypothetical protein hypothetical protein ECs2704 912443
1759919_s_at	35.4525	black	0	IG_1957877_1958085-f	DEF=intergenic region
1765918_s_at	35.3884	black	946721	b2223	DEF=short chain fatty acid transporter Short-chain fatty acids transporter
1760692_s_at	35.2887	black	0	IG_3267244_3267856-f	DEF=intergenic region
1760650_at	35.2449	black	947124	b2632	DEF=putative GTP-binding protein CP4-57 prophage; predicted GTP-binding protein yfjP 947124 0005622
1760974_s_at	35.2413	black	0	IG_502463_502699-f	DEF=intergenic region
1761032_s_at	35.2394	black	0	IG_617262_617476-r	DEF=intergenic region
1759209_s_at	35.1688	black	0	IG_882612_882895-r	DEF=intergenic region
1766103_s_at	35.1546	black	914766	b2656	DEF=orf, hypothetical protein hypothetical protein
1766704_s_at	35.142	black	959623	Z3818	DEF=putative oxidoreductase hypothetical protein
1762163_at	35.1281	black	946098	b1547	DEF=hypothetical protein Qin prophage; predicted side tail fibre assembly protein ydfN 946098 0005198
1768087_s_at	35.0804	black	0	IG_3085880_3086302-r	DEF=intergenic region
1761000_s_at	34.9851	black	0	IG_3420831_3421058-r	DEF=intergenic region
1764107_s_at	34.9528	black	0	IG_780876_781307-f	DEF=intergenic region
1765943_s_at	34.9264	black	0	IG_1906791_1907331-f	DEF=intergenic region
1765417_s_at	34.9241	black	916156	b3119	DEF=threonine dehydratase operon activator protein DNA-binding transcriptional activator TdcR
1764933_s_at	34.9137	black	914274	b4083	DEF=orf, hypothetical protein hypothetical protein
1759603_at	34.9102	black	947309	b2634	DEF=orf, hypothetical protein CP4-57 prophage; predicted DNA-binding transcriptional regulator yfjR 947309 0006350
1766904_s_at	34.9016	black	1038786	c3084	DEF=Hypothetical protein hypothetical protein c3084 1038786
1767414_s_at	34.8905	black	0	IG_892657_893006-r	DEF=intergenic region
1759849_s_at	34.8327	black	0	IG_914129_914574-r	DEF=intergenic region
1762907_at	34.8146	black	946655	b2161	DEF=putative pyrimidine nucleoside transporter predicted nucleoside transporter nupX 946655 0006810
1763278_at	34.8099	black	947338	b2854	DEF=orf, hypothetical protein pseudo pbl 947338
1766352_s_at	34.802	black	0	IG_791279_791538-f	DEF=intergenic region
1765727_s_at	34.6868	black	0	IG_1434918_1435144-r	DEF=intergenic region
1768806_s_at	34.6775	black	0	IG_3407589_3407916-r	DEF=intergenic region
1767538_at	34.665	black	946111	b1567	DEF=orf, hypothetical protein Qin prophage; predicted protein ydfW 946111
1761472_at	34.661	black	948903	b4341	DEF=orf, hypothetical protein conserved protein yjiS 948903
1760454_s_at	34.6396	black	0	IG_11787_12162-f	DEF=intergenic region
1762629_s_at	34.5873	black	0	IG_1903284_1903657-r	DEF=intergenic region
1764153_s_at	34.5289	black	1040288	c0703	DEF=Hypothetical protein hypothetical protein c0703 1040288
1765135_s_at	34.5257	black	915825	b0510	DEF=orf, hypothetical protein hypothetical protein
1767534_s_at	34.5163	black	0	IG_3067828_3068184-f	DEF=intergenic region
1760886_s_at	34.4921	black	917536	b0768	DEF=putative transcriptional regulator LYSR-type putative transcriptional regulator LYSR-type
1765049_s_at	34.4814	black	0	IG_1118270_1118529-f	DEF=intergenic region
1759205_at	34.3455	black	946103	b1559	DEF=hypothetical protein Qin prophage; predicted antitermination protein Q quuQ 946103 0006350
1769228_s_at	34.3077	black	0	IG_230882_231121-f	DEF=intergenic region
1761162_s_at	34.2288	black	946651	b2120	DEF=orf, hypothetical protein hypothetical protein
1762966_s_at	34.2218	black	947892	b3378	DEF=orf, hypothetical protein hypothetical protein
1759194_s_at	34.2175	black	0	IG_2915836_2916066-f	DEF=intergenic region
1759076_s_at	34.1866	black	0	IG_320306_320831-r	DEF=intergenic region
1760066_s_at	34.0841	black	0	IG_2796517_2797184-r	DEF=intergenic region
1762538_at	34.017	black	945373	b0252	DEF=orf, hypothetical protein CP4-6 prophage; conserved protein yafZ 945373
1769233_s_at	34.0076	black	0	IG_1211227_1211925-f	DEF=intergenic region
1760759_s_at	33.9512	black	0	IG_343158_343399-r	DEF=intergenic region
1762047_s_at	33.8768	black	913573	b4365	DEF=putative regulator putative regulator
1766699_s_at	33.821	black	915293	c4688	DEF=Hypothetical protein hypothetical protein
1762930_at	33.8125	black	944886	b0037	DEF=probable crotonobetainecarnitine-CoA ligase predicted crotonobetaine CoA ligase:carnitine CoA ligase caiC 944886 8152
1764885_s_at	33.7118	black	0	IG_3181340_3181828-f	DEF=intergenic region
1768199_s_at	33.6802	black	912954	b1701	DEF=putative ligasesynthetase short chain acyl-CoA synthetase
1762952_s_at	33.6356	black	0	IG_3345880_3346092-f	DEF=intergenic region
1762430_at	33.5108	black	945359	b0732	DEF=putative sugar hydrolase alpha-mannosidase mngB 945359 0005975
1767771_s_at	33.4868	black	912976	c2118	DEF=Putative conserved protein pseudo
1761699_s_at	33.4179	black	0	IG_3249651_3249943-r	DEF=intergenic region
1763105_s_at	33.3653	black	0	IG_3697829_3698191-r	DEF=intergenic region
1759938_at	33.3537	black	945721	b1158	DEF=inversion of adjacent DNA; at locus of e14 element e14 prophage; site-specific DNA recombinase pinE 945721 0006310
1759307_s_at	33.3315	black	0	IG_17007_17488-f	DEF=intergenic region
1768963_s_at	33.2989	black	946621	b2110	DEF=putative chaperone fimbrial chaperone yehC precursor
1765182_s_at	33.2763	black	0	IG_3250310_3250550-f	DEF=intergenic region
1761161_s_at	33.1333	black	0	IG_3279267_3279616-r	DEF=intergenic region
1766184_s_at	33.1196	black	0	IG_121552_122091-f	DEF=intergenic region
1763030_s_at	33.1117	black	914017	b1028	DEF=orf, hypothetical protein hypothetical protein
1764104_s_at	32.9555	black	0	IG_1388683_1388956-f	DEF=intergenic region
1764705_at	32.9283	black	946911	b2437	DEF=putative ARAC-type regulatory protein predicted DNA-binding transcriptional regulator eutR 946911 0006350
1763525_s_at	32.8746	black	0	IG_450835_451293-r	DEF=intergenic region
1768169_s_at	32.8181	black	947834	b3329	DEF=putative general protein secretion protein predicted general secretory pathway component, cryptic
1764882_s_at	32.8118	black	0	IG_2011037_2011250-r	DEF=intergenic region
1759506_s_at	32.7893	black	0	IG_312002_313580-r	DEF=intergenic region
1765477_at	32.7011	black	945559	b0944	DEF=putative chaperone predicted periplasmic pilini chaperone ycbF 945559 0007047
1762092_at	32.6976	black	948801	b1565	DEF=orf, hypothetical protein Qin prophage; predicted protein ydfV 948801
1764142_at	32.6752	black	944835	b0136	DEF=putative fimbrial protein predicted fimbrial-like adhesin protein yadK 944835
1760520_s_at	32.6689	black	0	IG_2244790_2245082-f	DEF=intergenic region
1764008_s_at	32.6175	black	945251	Z0793	DEF=orf; Unknown function conserved protein
1762004_s_at	32.6124	black	915066	b3899	DEF=PTS system, fructose-like enzyme IIBC component putative PTS transporter components IIBC
1760987_at	32.6004	black	944837	b0135	DEF=putative fimbrial-like protein predicted fimbrial-like adhesin protein yadC 944837 0009289
1765969_s_at	32.5724	black	913019	b3679	DEF=putative cotransporter putative symporter YidK
1767093_s_at	32.5004	black	1035024	c1324	DEF=Hypothetical protein hypothetical protein c1324 1035024
1762582_s_at	32.472	black	1036937	IG_3575186_3575415-f	DEF=intergenic region hypothetical protein c4226 1036937
1759958_s_at	32.413	black	0	IG_2481360_2481774-f	DEF=intergenic region
1767725_at	32.3986	black	945394	b0507	DEF=glyoxylate carboligase glyoxylate carboligase gcl 945394 0009436
1762516_s_at	32.3897	black	0	IG_1449374_1449620-f	DEF=intergenic region
1768737_s_at	32.388	black	914765	b2657	DEF=putative enzyme hypothetical protein
1763454_s_at	32.3795	black	0	IG_2626959_2627309-r	DEF=intergenic region
1768526_s_at	32.3481	black	0	IG_939944_940268-r	DEF=intergenic region
1766123_s_at	32.3091	black	0	IG_2116427_2116701-f	DEF=intergenic region
1767306_s_at	32.2852	black	0	IG_719684_720278-f	DEF=intergenic region
1760484_s_at	32.2813	black	0	IG_582284_582903-r	DEF=intergenic region
1759451_s_at	32.2018	black	913976	b4204	DEF=orf, hypothetical protein hypothetical protein
1767312_s_at	32.1885	black	917538	b0769	DEF=orf, hypothetical protein hypothetical protein
1762928_s_at	32.058	black	946719	b2222	DEF=acetyl-CoA:acetoacetyl-CoA transferase beta subunit acetate CoA-transferase beta subunit
1761059_s_at	32.0524	black	917047	b0648	DEF=putative tRNA ligase putative tRNA ligase
1765584_s_at	31.9541	black	946642	b2108	DEF=putative type-1 fimbrial protein hypothetical protein
1768517_s_at	31.8459	black	0	IG_262171_262551-r	DEF=intergenic region
1767994_s_at	31.721	black	917211	b1411	DEF=putative enzymes hypothetical protein
1760623_s_at	31.6497	black	0	IG_2697944_2698637-f	DEF=intergenic region
1768793_s_at	31.6311	black	916583	b2073	DEF=orf, hypothetical protein hypothetical protein
1765770_s_at	31.6015	black	913256	b0558	DEF=putative an envelop protein hypothetical protein
1766426_s_at	31.5779	black	0	IG_238121_238745-f	DEF=intergenic region
1759162_at	31.5752	black	1036985	c5473	DEF=Phosphoserine phosphatase phosphoserine phosphatase serB 1036985
1766835_s_at	31.5679	black	0	IG_715929_716168-f	DEF=intergenic region
1760503_s_at	31.5506	black	0	IG_1932629_1932862-f	DEF=intergenic region
1763889_s_at	31.5291	black	0	IG_383694_384398-r	DEF=intergenic region
1764128_s_at	31.5144	black	0	IG_85313_85539-r	DEF=intergenic region
1765744_s_at	31.4596	black	0	IG_312002_313580-f	DEF=intergenic region
1769235_s_at	31.4549	black	0	IG_2076157_2077053-r	DEF=intergenic region
1760633_at	31.4127	black	916241	ECs3934	DEF=hypothetical protein hypothetical protein ECs3934 916241
1766622_s_at	31.4092	black	917098	b0703	DEF=orf, hypothetical protein RhsC
1767577_s_at	31.3766	black	913942	b4215	DEF=orf, hypothetical protein hypothetical protein
1759731_s_at	31.3586	black	0	IG_735443_736326-f	DEF=intergenic region
1760026_s_at	31.3557	black	0	IG_812171_812748-r	DEF=intergenic region
1760662_at	31.3537	black	946329	b1803	DEF=putative diogenase beta subunit predicted oxidoreductase yeaX 946329 0006810
1762378_s_at	31.3504	black	0	IG_1064516_1064807-f	DEF=intergenic region
1768706_s_at	31.3018	black	0	IG_2837291_2837546-f	DEF=intergenic region
1759269_at	31.2726	black	948839	b0249	DEF=orf, hypothetical protein CP4-6 prophage; predicted protein ykfF 948839
1763330_at	31.2272	black	947229	b2761	DEF=orf, hypothetical protein conserved protein, member of DEAD box family ygcB 947229 0006810
1763644_s_at	31.1922	black	0	IG_2714470_2714773-r	DEF=intergenic region
1761301_at	31.1428	black	948375	b3879	DEF=putative aldose-1-epimerase (EC 5.1.3.3) predicted aldose-1-epimerase yihR 948375 0005975
1763819_s_at	31.1206	black	915195	b3801	DEF=arylsulfatase arylsulfatase
1765462_at	31.0725	black	946726	b0245	DEF=orf, hypothetical protein CP4-6 prophage; toxin of the YkfI-YafW toxin-antitoxin system ykfI 946726
1764021_at	31.0159	black	2847765	b3692	DEF=2-oxo-3-deoxygalactonate 6-phosphate aldolase and galactonate dehydratase galactonate dehydratase dgoD 2847765 0008152
1764727_s_at	31.0012	black	914011	b4192	DEF=orf, hypothetical protein putative L-ascorbate 6-phosphate lactonase
1763302_s_at	30.9652	black	916211	Z4429	DEF=evolved beta-D-galactosidase, alpha subunit; cryptic gene cryptic beta-D-galactosidase subunit alpha
1762577_s_at	30.8667	black	915390	b3710	DEF=putative transport protein multidrug efflux system protein MdtL
1759619_s_at	30.8195	black	0	IG_2228406_2228643-f	DEF=intergenic region
1761835_s_at	30.8116	black	0	IG_3550107_3550717-r	DEF=intergenic region
1769053_s_at	30.7394	black	916956	b0566	DEF=envelope protein; thermoregulation of porin biosynthesis EnvY
1760222_s_at	30.6647	black	0	IG_3597290_3597559-f	DEF=intergenic region
1767498_s_at	30.5161	black	0	IG_1840160_1840394-f	DEF=intergenic region
1765718_s_at	30.4872	black	914651	b2770	DEF=putative transport protein putative transport protein
1761933_s_at	30.464	black	0	IG_1197461_1197917-r	DEF=intergenic region
1761312_s_at	30.4585	black	916015	b3265	DEF=transmembrane protein affects septum formation and cell membrane permeability acriflavin resistance protein E
1762195_s_at	30.4487	black	0	IG_1415788_1416031-f	DEF=intergenic region
1762412_s_at	30.4392	black	0	IG_3665211_3665420-r	DEF=intergenic region
1766665_s_at	30.424	black	915241	b2485	DEF=hydrogenase 4 membrane subunit hydrogenase 4 membrane subunit
1764938_s_at	30.3733	black	0	IG_503921_504137-f	DEF=intergenic region
1767178_s_at	30.2978	black	948798	b4265	DEF=L-idonate transporter Gnt-II system L-idonate transporter
1761340_s_at	30.2416	black	0	IG_2087763_2088017-f	DEF=intergenic region
1765392_s_at	30.2085	black	0	IG_1484988_1485258-r	DEF=intergenic region
1763234_s_at	30.1547	black	914861	b2596	DEF=orf, hypothetical protein hypothetical protein ECs3459 914861
1764461_s_at	30.0676	black	0	IG_255717_255976-f	DEF=intergenic region
1760452_s_at	30.0632	black	914741	b2681	DEF=putative transport protein putative transport protein
1763315_s_at	29.804	black	0	IG_2765377_2765724-f	DEF=intergenic region
1763340_s_at	29.7754	black	913585	b4358	DEF=putative oxidoreductase putative oxidoreductase
1762985_s_at	29.7662	black	947823	b3326	DEF=YheG general secretory pathway component, cryptic
1764996_s_at	29.6864	black	0	IG_289530_289872-r	DEF=intergenic region
1764555_s_at	29.6544	black	0	IG_3117129_3117612-r	DEF=intergenic region
1768686_s_at	29.646	black	0	IG_2257317_2257738-r	DEF=intergenic region
1762991_s_at	29.5929	black	0	IG_1395117_1395388-r	DEF=intergenic region
1767140_at	29.5817	black	948828	b2364	DEF=D-serine dehydratase (deaminase) transcriptional activator DNA-binding transcriptional dual regulator dsdC 948828 0006350
1764517_at	29.5509	black	944829	b0137	DEF=putative fimbrial protein predicted fimbrial-like adhesin protein yadL 944829
1768251_s_at	29.4497	black	947525	b2221	DEF=acetyl-CoA:acetoacetyl-CoA transferase alpha subunit acetyl-CoA:acetoacetyl-CoA transferase subunit alpha
1768322_at	29.4125	black	0	b2640	DEF=orf, hypothetical protein
1764218_s_at	29.3633	black	0	IG_2781229_2781657-r	DEF=intergenic region
1760195_s_at	29.3335	black	0	IG_1544053_1544311-r	DEF=intergenic region
1767550_s_at	29.2972	black	916504	b2826	DEF=prepilin peptidase dependent protein A hypothetical protein
1767152_at	29.2438	black	1040210	c4858	DEF=Hypothetical protein hypothetical protein c4858 1040210
1765763_at	29.2087	black	947640	b2650	DEF=orf, hypothetical protein pseudo ypjC 947640
1768373_s_at	29.1992	black	947309	b2635	DEF=orf, hypothetical protein CP4-57 prophage; predicted DNA-binding transcriptional regulator yfjR 947309 0006350
1765975_s_at	29.1147	black	1039996	c3835	DEF=Hypothetical protein hypothetical protein c3835 1039996
1767585_s_at	29.1079	black	914648	b2773	DEF=putative oxidoreductase subunit hypothetical protein
1761782_s_at	29.1076	black	0	IG_2208965_2209232-f	DEF=intergenic region
1759189_s_at	29.0346	black	914647	b2774	DEF=putative oxidoreductase putative oxidoreductase
1763140_s_at	29	black	0	IG_1331670_1331878-r	DEF=intergenic region
1763911_at	28.9896	black	948822	b2354	DEF=orf, hypothetical protein CPS-53 (KpLE1) prophage; conserved protein yfdK 948822
1764490_x_at	28.9741	black	0	IG_239085_239418-f	DEF=intergenic region
1763095_at	28.9638	black	947842	b3333	DEF=putative export protein K general secretory pathway component, cryptic gspL 947842 0006810
1760838_at	28.9563	black	946273	b1755	DEF=putative transport system permease protein fused transporter subunits of ABC superfamily: membrane components ynjC 946273
1759718_s_at	28.9425	black	0	IG_1488390_1488889-r	DEF=intergenic region
1763062_s_at	28.9055	black	914916	b2550	DEF=putative NAGC-like transcriptional regulator putative NAGC-like transcriptional regulator
1762839_s_at	28.8224	black	0	IG_3216718_3217023-f	DEF=intergenic region
1765994_s_at	28.7872	black	0	IG_2771114_2771338-r	DEF=intergenic region
1766196_s_at	28.7004	black	916766	b2170	DEF=putative transport sugar efflux transport protein
1767644_s_at	28.6983	black	0	IG_1561101_1561357-r	DEF=intergenic region
1768191_s_at	28.623	black	916354	b2950	DEF=putative protein transport putative protein transport
1759361_s_at	28.6058	black	0	IG_3654371_3654624-f	DEF=intergenic region
1768262_s_at	28.6002	black	914347	b0230	DEF=putative motility protein hypothetical protein
1765061_s_at	28.5217	black	916492	Z4368	DEF=orf; Unknown function hypothetical protein
1762968_s_at	28.5085	black	916938	c2136	DEF=PTS system, cellobiose-specific IIC component N,N'-diacetylchitobiose-specific PTS system transporter subunit IIC
1769068_s_at	28.488	black	912625	b1312	DEF=putative transport system permease protein putative transport system permease protein
1765184_s_at	28.4656	black	0	IG_2989782_2990115-f	DEF=intergenic region
1766468_s_at	28.437	black	0	IG_2989023_2989289-f	DEF=intergenic region
1764123_s_at	28.4035	black	913447	b0045	DEF=putative transport protein putative transport protein
1762861_s_at	28.3737	black	1037974	c2646	DEF=Hypothetical protein hypothetical protein c2646 1037974
1769278_s_at	28.2917	black	914361	b0236	DEF=probable peptide chain release factor peptide chain release factor-like protein
1760345_s_at	28.2639	black	0	IG_2903441_2903663-f	DEF=intergenic region
1760801_at	28.2478	black	948551	b4047	DEF=orf, hypothetical protein predicted protein yjbL 948551
1766372_s_at	28.1767	black	916471	b2852	DEF=putative invasion protein transcriptional regulator
1760181_s_at	28.128	black	0	IG_3319273_3319712-r	DEF=intergenic region
1759597_s_at	28.0831	black	916153	b3120	DEF=orf, hypothetical protein hypothetical protein
1768776_s_at	28.0673	black	0	IG_3635041_3635271-r	DEF=intergenic region
1768798_s_at	28.0418	black	914276	b1058	DEF=orf, hypothetical protein hypothetical protein
1761725_s_at	28.0189	black	0	IG_1590467_1590688-r	DEF=intergenic region
1760670_s_at	27.9806	black	0	IG_2767508_2767723-r	DEF=intergenic region
1762521_s_at	27.9681	black	947337	b0317	DEF=orf, hypothetical protein hypothetical protein
1767373_s_at	27.9583	black	0	IG_3382809_3383121-r	DEF=intergenic region
1764402_s_at	27.9221	black	914995	b3952	DEF=probable pyruvate formate lyase activating enzyme 2 pyruvate formate lyase II activase
1766692_at	27.8895	black	944929	b0246	DEF=orf, hypothetical protein CP4-6 prophage; antitoxin of the YkfI-YafW toxin-antitoxin system yafW 944929
1762795_s_at	27.8611	black	916546	b2920	DEF=putative coenzyme A transferase putative coenzyme A transferase
1767426_s_at	27.8316	black	914505	b0348	DEF=2,3-dihydroxyphenylpropionate 1,2-dioxygenase 3-(2,3-dihydroxyphenyl)propionate dioxygenase
1760747_s_at	27.6623	black	0	IG_1636692_1637053-f	DEF=intergenic region
1760596_s_at	27.6619	black	0	IG_301798_302214-r	DEF=intergenic region
1768628_s_at	27.6053	black	0	IG_1223131_1223501-f	DEF=intergenic region
1761807_s_at	27.564	black	913122	Z5153	DEF=orf; Unknown function hypothetical protein
1762894_at	27.559	black	0	b1239	DEF=orf, hypothetical protein
1768369_s_at	27.4763	black	0	IG_1096053_1096606-r	DEF=intergenic region
1768566_at	27.4325	black	915438	ECs4593	DEF=hypothetical protein hypothetical protein ECs4593 915438
1764427_at	27.1975	black	945417	b0254	DEF=peroxide resistance protein CP4-6 prophage; predicted DNA-binding transcriptional regulator perR 945417 0006350
1765204_s_at	27.1184	black	916867	b2272	DEF=orf, hypothetical protein hypothetical protein
1763297_s_at	27.0536	black	945134	b0512	DEF=putative hydrolase allantoinase
1760486_s_at	26.9183	black	0	IG_2783373_2783781-r	DEF=intergenic region
1768147_s_at	26.8606	black	0	IG_3332323_3332549-r	DEF=intergenic region
1768084_s_at	26.8547	black	0	IG_344216_344597-r	DEF=intergenic region
1766329_at	26.852	black	945685	b1121	DEF=homolog of virulence factor predicted inner membrane protein ycfZ 945685 0005886
1761654_s_at	26.8224	black	0	IG_2518693_2518950-r	DEF=intergenic region
1760199_s_at	26.7487	black	0	IG_2190817_2191078-r	DEF=intergenic region
1763179_s_at	26.728	black	0	IG_1803018_1803348-f	DEF=intergenic region
1759485_s_at	26.6953	black	915902	b3395	DEF=orf, hypothetical protein hypothetical protein
1769170_at	26.6438	black	949009	b0217	DEF=putative aminopeptidase predicted aminopeptidase yafT 949009 0005886
1769041_s_at	26.6137	black	916629	c2648	DEF=Hypothetical protein yehK protein
1766173_s_at	26.6001	black	0	IG_623734_624107-f	DEF=intergenic region
1767856_s_at	26.5445	black	912289	b1815	DEF=orf, hypothetical protein hypothetical protein
1768329_s_at	26.5333	black	0	IG_1948547_1948822-f	DEF=intergenic region
1768452_s_at	26.5065	black	0	IG_1184818_1185066-f	DEF=intergenic region
1759073_at	26.4176	black	945726	b1154	DEF=hypothetical protein e14 prophage; predicted protein ycfK 945726
1767383_s_at	26.407	black	0	IG_2598969_2599181-f	DEF=intergenic region
1760816_s_at	26.3867	black	0	IG_266192_266407-r	DEF=intergenic region
1761674_s_at	26.3629	black	0	IG_1800595_1801117-f	DEF=intergenic region
1765290_s_at	26.342	black	0	IG_3077350_3077662-r	DEF=intergenic region
1765650_s_at	26.1826	black	912504	c1791	DEF=Outer membrane protein G precursor outer membrane protein
1760714_s_at	26.1705	black	912795	ECs2538	DEF=putative transport protein putative transport protein
1766039_s_at	26.1683	black	0	IG_1785137_1785468-f	DEF=intergenic region
1759662_s_at	26.0815	black	0	IG_2775804_2776166-f	DEF=intergenic region
1761579_s_at	26.0295	black	916630	b2119	DEF=orf, hypothetical protein hypothetical protein
1767334_s_at	26.0288	black	0	IG_2573898_2574117-r	DEF=intergenic region
1768166_s_at	26.0121	black	916213	c5088	DEF=Hypothetical protein hypothetical protein
1767076_s_at	26.0082	black	916816	b2225	DEF=orf, hypothetical protein hypothetical protein
1766822_at	25.9958	black	947738	b3216	DEF=putative outer membrane protein predicted outer membrane protein yhcD 947738 0006810
1763635_s_at	25.9891	black	0	IG_840755_841018-f	DEF=intergenic region
1767144_s_at	25.8922	black	916393	c3498	DEF=Putative conserved protein hypothetical protein
1765627_s_at	25.8137	black	0	IG_1484988_1485258-f	DEF=intergenic region
1759177_s_at	25.797	black	0	IG_1636692_1637053-r	DEF=intergenic region
1765911_s_at	25.7319	black	0	IG_2783994_2784416-f	DEF=intergenic region
1767406_at	25.6604	black	947201	b2071	DEF=orf, hypothetical protein predicted protein yegJ 947201
1760667_s_at	25.6275	black	0	IG_1777326_1777640-f	DEF=intergenic region
1765669_s_at	25.6114	black	915632	b2386	DEF=putative transport protein putative PTS system IIC component ypdG
1760988_s_at	25.5568	black	915113	b3861	DEF=putative GTP-binding protein hypothetical protein
1765555_s_at	25.5045	black	0	IG_3013760_3014080-r	DEF=intergenic region
1765724_s_at	25.4577	black	915522	b3647	DEF=putative enzyme NAD-dependent DNA ligase LigB
1766970_s_at	25.4446	black	915093	b3876	DEF=putative permease putative permease
1759288_s_at	25.4108	black	0	IG_2773043_2773939-r	DEF=intergenic region
1759622_s_at	25.2878	black	0	IG_2755422_2755664-r	DEF=intergenic region
1767167_s_at	25.2614	black	0	IG_347668_347905-r	DEF=intergenic region
1763975_s_at	25.1785	black	917535	c0848	DEF=Hypothetical protein ybhJ hypothetical protein
1764447_s_at	25.1483	black	1038944	c3193	DEF=Hypothetical protein hypothetical protein c3193 1038944
1765090_s_at	25.0481	black	957939	Z3849	DEF=orf; Unknown function hypothetical protein Z3849 957939
1764655_s_at	25.019	black	917770	ECs1026	DEF=hypothetical protein hypothetical protein
1760189_s_at	24.9043	black	913931	b1791	DEF=putative amino acidamine transport protein putative amino acid
1762523_s_at	24.8741	black	0	IG_7960_8237-f	DEF=intergenic region
1765598_s_at	24.8735	black	0	IG_1214699_1215011-f	DEF=intergenic region
1762732_s_at	24.8709	black	0	IG_2085091_2085350-f	DEF=intergenic region
1766932_s_at	24.8283	black	948859	b4332	DEF=putative transport protein hypothetical protein
1766361_s_at	24.823	black	0	IG_2993115_2993335-f	DEF=intergenic region
1766455_s_at	24.8178	black	0	IG_2767508_2767723-f	DEF=intergenic region
1765894_s_at	24.7846	black	0	IG_1257737_1258013-r	DEF=intergenic region
1767870_s_at	24.7295	black	0	IG_914129_914574-f	DEF=intergenic region
1762570_s_at	24.7162	black	916271	b3014	DEF=orf, hypothetical protein putative outer membrane lipoprotein
1762571_at	24.6896	black	946020	b1483	DEF=putative ATP-binding component of a transport system D-ala-D-ala transporter subunit ddpF 946020 0006810
1764905_s_at	24.6855	black	917764	b0939	DEF=putative chaperone putative chaperone
1760753_at	24.6474	black	945722	b1157	DEF=putative tail fiber protein pseudo stfE 945722
1762901_at	24.6292	black	1037399	c5324	DEF=Hypothetical protein hypothetical protein c5324 1037399
1760532_s_at	24.5805	black	0	IG_2190243_2190534-r	DEF=intergenic region
1764951_at	24.5656	black	944931	b0248	DEF=orf, hypothetical protein CP4-6 prophage; predicted protein yafX 944931
1765936_s_at	24.5041	black	0	IG_1349064_1349430-f	DEF=intergenic region
1765548_s_at	24.4893	black	0	IG_1332854_1333854-r	DEF=intergenic region
1765863_s_at	24.4488	black	0	IG_316394_316949-r	DEF=intergenic region
1768593_s_at	24.3686	black	914645	b2776	DEF=putative kinase putative kinase
1760870_s_at	24.3582	black	1039379	c1152	DEF=Hypothetical protein hypothetical protein
1768287_s_at	24.3571	black	947829	b3327	DEF=HofF general secretory pathway component, cryptic
1765030_s_at	24.3041	black	1039610	c4998	DEF=Hypothetical protein hypothetical protein c4998 1039610
1768016_s_at	24.2798	black	0	IG_1999813_2000132-f	DEF=intergenic region
1765000_s_at	24.186	black	0	IG_2875642_2876591-f	DEF=intergenic region
1760011_s_at	24.1132	black	914435	b0297	DEF=attaching and effacing protein, pathogenesis factor putative adhesin
1761889_s_at	24.1026	black	0	IG_1752502_1752955-f	DEF=intergenic region
1761698_s_at	24.0584	black	0	IG_1416266_1416571-f	DEF=intergenic region
1765952_s_at	24.0357	black	0	IG_879710_879949-r	DEF=intergenic region
1762021_s_at	23.9788	black	915068	b3900	DEF=PTS system, fructose-specific IIA component putative fructose-like phosphotransferase system subunit EIIA
1765739_s_at	23.9432	black	0	IG_510604_510864-r	DEF=intergenic region
1766032_at	23.8575	black	948374	b3880	DEF=orf, hypothetical protein predicted glucosamine isomerase yihS 948374 0006013
1761120_s_at	23.8268	black	916151	b3135	DEF=putative N-acetylgalactosamine-6-phosphate deacetylase pseudo
1759817_s_at	23.7942	black	948448	b3949	DEF=PTS system, fructose-like enzyme II component putative fructose-like permease EIIC subunit 2
1765399_at	23.7878	black	945531	b0913	DEF=orf, hypothetical protein conserved inner membrane protein ycaI 945531 0030420
1761226_s_at	23.7807	black	945684	b1122	DEF=orf, hypothetical protein hypothetical protein
1762707_at	23.7472	black	1038201	c4814	DEF=Hypothetical protein hypothetical protein c4814 1038201
1768156_s_at	23.6752	black	0	IG_1811169_1811444-r	DEF=intergenic region
1768972_s_at	23.6668	black	0	IG_2289168_2289377-r	DEF=intergenic region
1764445_s_at	23.6617	black	915416	b3681	DEF=probable 6-phospho-beta-glucosidase putative 6-phospho-beta-glucosidase
1764489_s_at	23.6251	black	1038818	c1062	DEF=Hypothetical protein hypothetical protein c1062 1038818
1766232_s_at	23.6187	black	947768	Z4626	DEF=N-terminal fragment of integral transmembrane protein involved with acridine resistance multidrug efflux system protein
1761745_s_at	23.5963	black	916507	c3419	DEF=Prepilin peptidase dependent protein B precursor hypothetical protein
1762745_at	23.5571	black	948592	b4076	DEF=part of formate-dependent nitrite reductase complex heme lyase (NrfEFG) for insertion of heme into c552, subunit NrfG nrfG 948592 0005488
1761520_s_at	23.555	black	0	IG_2385458_2385729-r	DEF=intergenic region
1759746_s_at	23.523	black	915415	b3677	DEF=orf, hypothetical protein hypothetical protein
1759255_at	23.4976	black	4056032	b3217	DEF=orf, hypothetical protein pseudo yhcE 4056032
1760572_at	23.4383	black	946419	b2357	DEF=orf, hypothetical protein CPS-53 (KpLE1) prophage; predicted protein yfdN 946419
1766350_s_at	23.4331	black	915406	b3690	DEF=orf, hypothetical protein predicted oxidoreductase with FAD
1760826_s_at	23.3056	black	914227	b4121	DEF=orf, hypothetical protein hypothetical protein
1763369_at	23.1382	black	947123	b2645	DEF=orf, hypothetical protein CP4-57 prophage; antitoxin of the YpjF-YfjZ toxin-antitoxin system yfjZ 947123 0005515
1765536_s_at	23.1366	black	917210	b1410	DEF=orf, hypothetical protein hypothetical protein
1766660_at	23.1118	black	0	c5451	DEF=Hypothetical protein
1760424_s_at	23.1081	black	912973	b1801	DEF=putative transport protein putative transporter
1767938_at	23.0605	black	948236	b3722	DEF=PTS system beta-glucosides, enzyme II, cryptic fused beta-glucoside-specific PTS enzymes: IIA component
1763229_s_at	23.0108	black	915009	b3944	DEF=orf, hypothetical protein hypothetical protein
1767464_at	22.9895	black	948818	b4286	DEF=orf, hypothetical protein pseudo yjhV 948818
1765145_s_at	22.9752	black	0	IG_1014683_1014937-f	DEF=intergenic region
1764695_s_at	22.9723	black	0	IG_727956_728356-r	DEF=intergenic region
1759115_s_at	22.9066	black	1039044	c3255	DEF=Membrane-bound lytic murein transglycosylase B precursor murein hydrolase B mltB 1039044 0008152
1768398_s_at	22.766	black	945014	b0358	DEF=orf, hypothetical protein hypothetical protein
1763158_at	22.6808	black	946108	b1560	DEF=orf, hypothetical protein Qin prophage; predicted protein ydfU 946108
1765500_at	22.6571	black	945723	b1156	DEF=hypothetical protein e14 prophage; predicted tail fiber assembly protein tfaE 945723
1766347_s_at	22.6451	black	916759	b2163	DEF=stationary phase nitrogen starvation regulator DNA-binding transcriptional activator YeiL
1768039_at	22.6254	black	1038268	c4472	DEF=Hypothetical protein hypothetical protein c4472 1038268
1769002_s_at	22.595	black	947841	b3334	DEF=PshM general secretory pathway component, cryptic
1763966_s_at	22.571	black	0	IG_334247_334503-r	DEF=intergenic region
1765171_s_at	22.4921	black	960074	b4050	DEF=orf, hypothetical protein phage shock protein G pspG 1039331 960074
1763109_s_at	22.4676	black	0	IG_1636170_1636478-f	DEF=intergenic region
1760171_s_at	22.4058	black	916830	b2238	DEF=orf, hypothetical protein putative transcriptional regulator
1759796_at	22.3838	black	947131	b2646	DEF=orf, hypothetical protein CP4-57 prophage; toxin of the YpjF-YfjZ toxin-antitoxin system ypjF 947131
1766391_at	22.3551	black	948376	b3878	DEF=putative glycosidase alpha-glucosidase yihQ 948376 0005975
1767384_s_at	22.3152	black	914907	b1696	DEF=putative ARAC-type regulatory protein putative ARAC-type regulatory protein
1761616_s_at	22.2215	black	0	IG_3709637_3709864-f	DEF=intergenic region
1766484_at	22.2208	black	945891	b1317	DEF=putative beta-phosphoglucomutase predicted beta-phosphoglucomutase ycjU 945891 0008152
1766703_s_at	22.1969	black	915635	b2383	DEF=putative PTS system enzyme IIA component, enzyme I putative PTS system enzyme IIA component
1769047_s_at	22.1946	black	914004	ECs5169	DEF=hypothetical protein ascorbate-specific PTS system enzyme IIC
1768753_s_at	22.1622	black	1036932	c2320	DEF=Hypothetical protein hypothetical protein c2320 1036932
1769230_s_at	22.0513	black	0	IG_1278572_1279086-r	DEF=intergenic region
1765567_s_at	22.0237	black	0	IG_579310_580056-r	DEF=intergenic region
1759478_at	21.9609	black	948550	b4048	DEF=orf, hypothetical protein predicted protein yjbM 948550
1765270_s_at	21.9602	black	913865	b1689	DEF=orf, hypothetical protein hypothetical protein
1762374_s_at	21.8996	black	948398	Z5452	DEF=rhamnose transport rhamnose-proton symporter
1760756_at	21.8712	black	0	b0370	DEF=orf, hypothetical protein
1766169_s_at	21.7944	black	0	IG_578117_578406-f	DEF=intergenic region
1765126_s_at	21.7418	black	0	IG_497044_497278-r	DEF=intergenic region
1767931_s_at	21.6926	black	0	IG_2689361_2689675-r	DEF=intergenic region
1761232_s_at	21.6878	black	916416	b2882	DEF=putative transport protein putative transport protein
1760883_s_at	21.6829	black	917537	b0770	DEF=putative membrane pump protein putative membrane pump protein
1761272_s_at	21.6776	black	0	IG_395512_395862-r	DEF=intergenic region
1768190_at	21.6652	black	0	b2653	DEF=orf, hypothetical protein
1763872_s_at	21.659	black	914139	Z2764	DEF=phospho-beta-glucosidase; cryptic 6-phospho-beta-glucosidase
1762843_s_at	21.6057	black	0	IG_1210403_1210902-r	DEF=intergenic region
1765983_s_at	21.5292	black	916821	ECs3113	DEF=hypothetical protein hypothetical protein
1765560_s_at	21.4877	black	912380	ECs1917	DEF=hypothetical protein predicted cryptic aminobenzoyl-glutamate transporter
1759534_s_at	21.4862	black	0	IG_752019_752407-f	DEF=intergenic region
1769274_at	21.4732	black	948272	b3719	DEF=putative xylanase predicted xylanase yieL 948272
1766435_at	21.4724	black	945724	b1155	DEF=hypothetical protein e14 prophage; predicted protein ymfS 945724
1766554_s_at	21.4352	black	0	IG_301798_302214-f	DEF=intergenic region
1763152_s_at	21.417	black	915007	b3951	DEF=formate acetyltransferase 2 putative formate acetyltransferase 2
1768081_s_at	21.3958	black	915910	b3392	DEF=orf, hypothetical protein hypothetical protein
1763139_s_at	21.3356	black	914996	b3953	DEF=PTS system fructose-like IIB component 2 putative fructose-like phosphotransferase EIIB subunit 3
1763392_s_at	21.3335	black	945444	Z1045	DEF=putative pyruvate formate-lyase 2 predicted pyruvate formate lyase
1768825_at	21.2925	black	0	b4274	DEF=orf, hypothetical protein
1768249_s_at	21.239	black	1036479	c4712	DEF=Hypothetical protein hypothetical protein c4712 1036479
1762599_s_at	21.1915	black	916819	b2228	DEF=putative membrane protein hypothetical protein
1767575_s_at	20.9937	black	0	IG_1891736_1892096-r	DEF=intergenic region
1759375_s_at	20.9377	black	0	IG_1214699_1215011-r	DEF=intergenic region
1759839_s_at	20.7963	black	947948	b3446	DEF=orf, hypothetical protein hypothetical protein
1761902_s_at	20.7778	black	0	IG_1927732_1928057-f	DEF=intergenic region
1764373_s_at	20.7551	black	0	IG_2980205_2980518-r	DEF=intergenic region
1763439_at	20.7283	black	945928	b1362	DEF=putative Rac prophage endopeptidase pseudo rzpR 945928
1760574_s_at	20.6866	black	0	IG_353817_354145-r	DEF=intergenic region
1768044_at	20.5864	black	946834	b2361	DEF=orf, hypothetical protein CPS-53 (KpLE1) prophage; conserved protein yfdR 946834 0003824
1764322_at	20.5586	black	1037603	c4393	DEF=Valine--pyruvate aminotransferase valine--pyruvate transaminase avtA 1037603
1764071_s_at	20.5539	black	947065	b2578	DEF=orf, hypothetical protein neutral amino-acid efflux system
1765058_s_at	20.5114	black	0	IG_310561_311335-r	DEF=intergenic region
1760115_at	20.4966	black	945696	b1310	DEF=putative transport periplasmic protein predicted sugar transporter subunit: periplasmic-binding component of ABC superfamily ycjN 945696 0006810
1761061_at	20.4948	black	2847726	b2117	DEF=molybdate metabolism regulator, third fragment pseudo yehH 2847726
1764380_s_at	20.4894	black	948235	b3723	DEF=positive regulation of bgl operon transcriptional antiterminator BglG
1761158_s_at	20.4774	black	0	IG_1417526_1417788-f	DEF=intergenic region
1761308_at	20.4076	black	946109	b1561	DEF=orf, hypothetical protein Qin prophage; predicted protein rem 946109
1766863_s_at	20.3466	black	0	IG_3597290_3597559-r	DEF=intergenic region
1767533_s_at	20.3365	black	0	IG_1210403_1210902-f	DEF=intergenic region
1768679_s_at	20.3032	black	913668	Z5904	DEF=orf; Unknown function hypothetical protein
1765212_at	20.3015	black	0	b1367	DEF=orf, hypothetical protein
1760406_s_at	20.2761	black	0	IG_2039141_2039396-f	DEF=intergenic region
1765810_s_at	20.2021	black	0	IG_3523788_3524106-r	DEF=intergenic region
1767210_s_at	20.1775	black	913998	b4197	DEF=putative hexulose-6-phosphate isomerase L-xylulose 5-phosphate 3-epimerase
1764267_s_at	20.1465	black	0	IG_1509434_1509677-f	DEF=intergenic region
1763555_s_at	20.1333	black	913642	ECs1418	DEF=hypothetical protein hypothetical protein ECs1418 913642
1760025_s_at	20.091	black	1040478	c0182	DEF=Hypothetical protein hypothetical protein c0182 1040478
1762204_s_at	20.0323	black	1450236	IG_263232_263479-r	DEF=intergenic region predicted protein ykfH 1450236
1764852_s_at	20.0238	black	0	IG_578860_579102-r	DEF=intergenic region
1763220_s_at	19.9817	black	0	IG_2264043_2264264-f	DEF=intergenic region
1761611_s_at	19.9491	black	0	IG_1272823_1273147-f	DEF=intergenic region
1764018_s_at	19.8554	black	2693760	IG_642550_642629-r	DEF=intergenic region hypothetical protein ECs5383 2693760
1766168_s_at	19.8339	black	913219	b0563	DEF=orf, hypothetical protein hypothetical protein
1767591_s_at	19.7109	black	0	IG_3415775_3416026-r	DEF=intergenic region
1768173_s_at	19.6979	black	0	IG_1463086_1463415-r	DEF=intergenic region
1759364_s_at	19.6973	black	916473	b2850	DEF=orf, hypothetical protein hypothetical protein
1759296_s_at	19.6363	black	917001	b0603	DEF=putative transcriptional regulator LYSR-type putative transcriptional regulator LYSR-type
1768491_at	19.6254	black	947822	b3325	DEF=YheF general secretory pathway component, cryptic gspD 947822 0006810
1767381_at	19.6128	black	944930	b0247	DEF=putative DNA repair protein CP4-6 prophage; predicted DNA repair protein ykfG 944930 0006281
1767717_s_at	19.5569	black	914925	b2542	DEF=ferredoxin reductase subunit of phenylpropionate dioxygenase phenylpropionate dioxygenase ferredoxin reductase subunit
1759338_s_at	19.534	black	912842	Z3786	DEF=putative peptidoglycan enzyme penicillin-binding protein 1C
1766782_s_at	19.5248	black	0	IG_578117_578406-r	DEF=intergenic region
1763848_s_at	19.4881	black	917286	b1484	DEF=putative ATP-binding component of a transport system D-ala-D-ala transporter subunit
1760930_s_at	19.4506	black	916488	Z4367	DEF=orf; Unknown function hypothetical protein
1764110_s_at	19.4496	black	0	IG_474386_474602-r	DEF=intergenic region
1763353_s_at	19.4187	black	0	IG_3389664_3390093-f	DEF=intergenic region
1767611_at	19.4143	black	949063	b2546	DEF=putative transport system permease protein predicted sugar transporter subunit: membrane component of ABC superfamily yphD 949063 0006810
1760211_at	19.3845	black	947125	b2644	DEF=putative DNA repair protein CP4-57 prophage; predicted DNA repair protein yfjY 947125 0006281
1759559_s_at	19.3718	black	916136	Z4504	DEF=partial putative fimbrial protein disrupted fimbrial protein
1764448_s_at	19.3422	black	0	IG_2783994_2784416-r	DEF=intergenic region
1762057_at	19.3366	black	948340	b3817	DEF=orf, hypothetical protein conserved inner membrane protein yigF 948340
1767709_s_at	19.2932	black	0	IG_3672006_3672415-r	DEF=intergenic region
1759973_at	19.271	black	948100	b3582	DEF=putative 3-hexulose-6-phosphate isomerase predicted L-xylulose 5-phosphate 3-epimerase sgbU 948100 0005975
1767379_s_at	19.2328	black	0	IG_1216220_1216508-f	DEF=intergenic region
1763411_s_at	19.2145	black	914765	b2658	DEF=orf, hypothetical protein hypothetical protein
1762550_s_at	19.1512	black	0	IG_320306_320831-f	DEF=intergenic region
1760023_s_at	19.0764	black	0	IG_1766710_1767097-f	DEF=intergenic region
1763382_s_at	19.0413	black	0	IG_310561_311335-f	DEF=intergenic region
1761886_s_at	18.9643	black	915924	b3370	DEF=putative amino acidamine transport protein putative fructoselysine transporter
1761418_s_at	18.9432	black	946313	b1377	DEF=putative outer membrane protein Outer membrane protein N precursor
1767166_at	18.9358	black	946112	b1568	DEF=orf, hypothetical protein Qin prophage; predicted protein ydfX 946112
1767615_s_at	18.9299	black	0	IG_3679571_3679790-f	DEF=intergenic region
1766545_s_at	18.9231	black	0	IG_3693815_3694086-f	DEF=intergenic region
1759074_at	18.9137	black	946748	b2273	DEF=orf, hypothetical protein predicted protein yfbN 946748
1763033_s_at	18.9106	black	0	IG_1986022_1986244-r	DEF=intergenic region
1762340_at	18.8873	black	2847750	b1401	DEF=orf, hypothetical protein pseudo ydbA 2847750
1764326_at	18.7048	black	944841	b0141	DEF=putative fimbrial-like protein predicted fimbrial-like adhesin protein yadN 944841 0007155
1761063_s_at	18.7021	black	1038412	c2858	DEF=Conserved hypothetical protein hypothetical protein c2858 1038412
1764313_s_at	18.6545	black	0	IG_2539274_2539698-f	DEF=intergenic region
1761253_s_at	18.614	black	0	IG_2816668_2816982-f	DEF=intergenic region
1763842_s_at	18.6038	black	0	IG_5021_5233-r	DEF=intergenic region
1767409_at	18.5952	black	945659	b1309	DEF=putative polysaccharide hydrolase predicted glucosyltransferase ycjM 945659 0005975
1762502_s_at	18.5728	black	0	IG_3126037_3126286-f	DEF=intergenic region
1761417_s_at	18.5095	black	0	IG_1840160_1840394-r	DEF=intergenic region
1763704_s_at	18.4625	black	917289	ECs2090	DEF=hypothetical protein D-ala-D-ala transporter subunit
1763189_s_at	18.4	black	0	IG_606607_607058-f	DEF=intergenic region
1764789_s_at	18.2618	black	0	IG_156884_157252-r	DEF=intergenic region
1768535_s_at	18.2252	black	916142	Z4501	DEF=orf; hypothetical protein truncated putative fimbrial protein
1760005_s_at	18.1802	black	0	IG_1956157_1956543-r	DEF=intergenic region
1759667_s_at	18.1627	black	0	IG_1755135_1755444-f	DEF=intergenic region
1762280_at	18.1582	black	945251	b0644	DEF=orf, hypothetical protein conserved protein ybeQ 945251 0005488
1764654_s_at	18.0553	black	0	IG_1819644_1819941-f	DEF=intergenic region
1761916_s_at	18.0465	black	1036175	c0485	DEF=Hypothetical protein hypothetical protein c0485 1036175
1765070_s_at	17.9365	black	0	IG_856779_857018-r	DEF=intergenic region
1763477_at	17.933	black	0	b0808	DEF=putative transport protein
1759929_s_at	17.9109	black	915994	b3286	DEF=orf, fragment 1 hypothetical protein
1768142_s_at	17.8592	black	0	IG_1766710_1767097-r	DEF=intergenic region
1764967_s_at	17.8234	black	1038157	c2742	DEF=Hypothetical protein hypothetical protein c2742 1038157
1759130_s_at	17.7679	black	913574	b1648	DEF=orf, hypothetical protein hypothetical protein
1761988_s_at	17.7506	black	947475	b2987	DEF=low-affinity phosphate transport inorganic phosphate transporter
1761424_s_at	17.739	black	0	IG_3183147_3183429-r	DEF=intergenic region
1769012_s_at	17.7247	black	1034985	c0567	DEF=Hypothetical protein hypothetical protein c0567 1034985
1769127_s_at	17.7116	black	0	IG_1735315_1735867-f	DEF=intergenic region
1766948_s_at	17.6382	black	1036929	c2317	DEF=Hypothetical protein hypothetical protein c2317 1036929
1759967_s_at	17.6358	black	0	IG_1899610_1900071-f	DEF=intergenic region
1760391_s_at	17.6107	black	1037324	c5361	DEF=Hypothetical protein hypothetical protein c5361 1037324
1765240_s_at	17.5886	black	916481	b2848	DEF=orf, hypothetical protein hypothetical protein
1765394_at	17.5797	black	947616	b2637	DEF=orf, hypothetical protein CP4-57 prophage; predicted protein yfjT 947616
1766417_s_at	17.5649	black	915234	b2490	DEF=putative protein processing element putative protein processing element
1759978_s_at	17.4979	black	959792	b4247	DEF=orf, hypothetical protein hypothetical protein yjgG_1 959792
1762563_s_at	17.4904	black	912614	b1314	DEF=putative transient receptor potential locus hypothetical protein
1765201_s_at	17.4236	black	1038681	c3016	DEF=Hypothetical protein hypothetical protein c3016 1038681
1763629_s_at	17.4083	black	0	IG_2519349_2519612-r	DEF=intergenic region
1761499_s_at	17.4054	black	1038011	b2139	DEF=orf, hypothetical protein multidrug resistance outer membrane protein MdtQ yohG 1038011
1763393_s_at	17.3728	black	0	IG_1785137_1785468-r	DEF=intergenic region
1763097_s_at	17.3198	black	0	IG_3467491_3467781-r	DEF=intergenic region
1766752_at	17.2615	black	945926	b1360	DEF=putative DNA replication factor Rac prophage; predicted DNA replication protein ydaV 945926 0000166
1769007_s_at	17.2065	black	0	IG_1050399_1050683-r	DEF=intergenic region
1768007_s_at	17.1799	black	0	IG_571475_571688-r	DEF=intergenic region
1762873_s_at	17.1233	black	917722	b0899	DEF=putative transport putative transport
1760220_s_at	17.1192	black	0	IG_3579258_3579493-r	DEF=intergenic region
1761490_s_at	17.0984	black	914921	b2544	DEF=orf, hypothetical protein hypothetical protein
1760244_at	17.0206	black	945416	b2356	DEF=orf, hypothetical protein pseudo yfdM 945416
1763107_s_at	16.8394	black	0	IG_1619063_1619355-r	DEF=intergenic region
1768694_s_at	16.8244	black	945134	Z0667	DEF=orf; Unknown function allantoinase
1766291_s_at	16.8128	black	916112	b1592	DEF=putative chloride channel predicted voltage-gated chloride channel
1765726_s_at	16.785	black	0	IG_1066932_1067140-f	DEF=intergenic region
1765658_at	16.7648	black	948389	b3897	DEF=putative frv operon regulatory protein predicted regulator frvR 948389 0006350
1759278_at	16.7556	black	2693787	ECs5541	DEF=hypothetical protein hypothetical protein ECs5541 2693787
1767707_at	16.7274	black	0	b0362	DEF=orf, hypothetical protein
1761997_at	16.6739	black	2847669	b4344	DEF=inhibits McrE 5-methylcytosine restriction system pseudo yjiV 2847669
1764460_s_at	16.6595	black	0	IG_2774890_2775135-r	DEF=intergenic region
1764980_s_at	16.6122	black	0	IG_1197461_1197917-f	DEF=intergenic region
1762957_s_at	16.5887	black	0	b0017	DEF=hypothetical protein
1762243_s_at	16.5501	black	0	IG_752019_752407-r	DEF=intergenic region
1759370_s_at	16.5346	black	0	IG_1223131_1223501-r	DEF=intergenic region
1768497_s_at	16.5105	black	0	IG_2425812_2426076-f	DEF=intergenic region
1763425_s_at	16.4788	black	0	IG_347668_347905-f	DEF=intergenic region
1766077_s_at	16.4363	black	913434	b0035	DEF=possible synthesis of cofactor for carnitine racemase and dehydratase carnitine operon protein CaiE
1759311_s_at	16.3882	black	0	IG_1668977_1669372-f	DEF=intergenic region
1765358_s_at	16.3425	black	915879	b3421	DEF=orf, hypothetical protein hypothetical protein
1761569_s_at	16.3404	black	0	IG_1195597_1196089-r	DEF=intergenic region
1760843_at	16.3359	black	948678	b4157	DEF=orf, hypothetical protein predicted protein yjeN 948678
1765745_s_at	16.311	black	0	IG_3654371_3654624-r	DEF=intergenic region
1761241_s_at	16.2867	black	0	IG_3579258_3579493-f	DEF=intergenic region
1763719_s_at	16.2755	black	1039195	c3355	DEF=Hypothetical protein hypothetical protein c3355 1039195
1767973_s_at	16.27	black	0	IG_59280_59686-r	DEF=intergenic region
1767402_s_at	16.2424	black	915239	b2486	DEF=hydrogenase 4 membrane subunit hydrogenase 4 subunit F
1765185_s_at	16.2171	black	914968	b3975	DEF=orf, hypothetical protein hypothetical protein
1767216_s_at	16.1496	black	0	IG_1390915_1391229-r	DEF=intergenic region
1768308_s_at	16.0284	black	0	IG_2626959_2627309-f	DEF=intergenic region
1769008_s_at	16.0134	black	0	IG_2786671_2786900-f	DEF=intergenic region
1762458_s_at	15.9763	black	915094	b3881	DEF=putative aldolase putative aldolase
1760116_s_at	15.9634	black	916586	b2076	DEF=orf, hypothetical protein multidrug efflux system subunit MdtC
1767530_s_at	15.8808	black	0	IG_2111084_2111455-f	DEF=intergenic region
1767576_s_at	15.8692	black	916839	ECs3131	DEF=hypothetical protein hypothetical protein
1759714_s_at	15.8488	black	0	IG_2347493_2347706-f	DEF=intergenic region
1760566_s_at	15.8183	black	0	IG_3638176_3638491-r	DEF=intergenic region
1759349_s_at	15.78	black	960780	Z2263	DEF=unknown protein associated with Rhs element Rhs element protein Z2263 960780
1759082_s_at	15.7667	black	0	IG_769835_770677-r	DEF=intergenic region
1760010_s_at	15.742	black	913715	b1775	DEF=putative transport protein putative transport protein
1765879_s_at	15.6819	black	0	IG_1554368_1554648-f	DEF=intergenic region
1767620_s_at	15.5592	black	917288	b1485	DEF=putative transport protein D-ala-D-ala transporter subunit
1759103_s_at	15.5334	black	0	IG_2042647_2042884-f	DEF=intergenic region
1767724_s_at	15.4886	black	915533	b3638	DEF=DNA repair protein DNA repair protein RadC
1765582_at	15.4861	black	0	b2639	DEF=putative pump protein
1760300_s_at	15.4836	black	917258	b1455	DEF=orf, hypothetical protein hypothetical protein
1765178_s_at	15.4643	black	0	IG_660449_660859-r	DEF=intergenic region
1763902_s_at	15.4582	black	915183	b3814	DEF=orf, hypothetical protein hypothetical protein
1761045_s_at	15.4368	black	1035627	c1824	DEF=Hypothetical protein hypothetical protein c1824 1035627
1763742_s_at	15.4355	black	0	IG_1529601_1529839-r	DEF=intergenic region
1760112_s_at	15.4155	black	0	IG_572957_573178-r	DEF=intergenic region
1764410_s_at	15.376	black	917231	Z2286	DEF=putative membrane transport protein hypothetical protein
1760538_s_at	15.3368	black	0	IG_303407_303718-f	DEF=intergenic region
1760550_s_at	15.3328	black	0	IG_3496839_3497084-f	DEF=intergenic region
1759371_s_at	15.3312	black	0	IG_1639579_1639878-f	DEF=intergenic region
1765402_s_at	15.3283	black	945696	c1782	DEF=Putative ABC transporter Periplasmic binding protein ycjN precursor ABC transporter periplasmic-binding protein
1765385_at	15.3258	black	1040108	c4903	DEF=Hypothetical protein hypothetical protein c4903 1040108
1761001_at	15.2957	black	948677	b4158	DEF=orf, hypothetical protein conserved inner membrane protein yjeO 948677 0005886
1767088_s_at	15.1759	black	1039987	c3829	DEF=Hypothetical protein hypothetical protein c3829 1039987
1761002_s_at	15.1644	black	0	IG_1814153_1814409-r	DEF=intergenic region
1761104_s_at	15.1592	black	947196	b2734	DEF=protein phosphatase 2 serine
1766756_s_at	15.1268	black	0	IG_2496316_2496690-r	DEF=intergenic region
1760785_s_at	15.0689	black	915418	b3675	DEF=orf, hypothetical protein hypothetical protein
1768546_at	15.0153	black	1036343	c4689	DEF=Hypothetical protein hypothetical protein c4689 1036343
1764562_s_at	15.007	black	914510	b0353	DEF=putative transport protein putative 3-hydroxyphenylpropionic transporter MhpT
1768176_at	14.9847	black	946100	b1554	DEF=putative lysozyme Qin prophage; predicted lysozyme arrQ 946100 0008152
1762773_s_at	14.9634	black	0	IG_2175231_2175531-f	DEF=intergenic region
1761127_at	14.9074	black	947025	b2968	DEF=putative secretion pathway protein predicted secretion pathway M-type protein, membrane anchored yghD 947025 0006810
1761715_s_at	14.9068	black	1039237	c3384	DEF=Membrane-bound lytic murein transglycosylase A precursor murein transglycosylase A mltA 1039237
1762879_at	14.8934	black	0	b1556	DEF=hypothetical protein
1762514_at	14.8473	black	949102	b4296	DEF=putative transport system permease KpLE2 phage-like element; predicted transporter yjhF 949102 0006810
1768098_s_at	14.8316	black	947476	b2985	DEF=orf, hypothetical protein ATP-binding protein yghS
1761816_s_at	14.8107	black	1035389	c1624	DEF=Hypothetical protein hypothetical protein c1624 1035389
1760064_s_at	14.7855	black	916781	b0521	DEF=putative carbamate kinase (EC 2.7.2.2) carbamate kinase
1761609_s_at	14.7666	black	0	IG_1859357_1859725-r	DEF=intergenic region
1762911_s_at	14.7575	black	0	IG_2763175_2763533-f	DEF=intergenic region
1760476_at	14.7354	black	945523	b0900	DEF=putative transcriptional regulator LYSR-type predicted DNA-binding transcriptional regulator ycaN 945523 0006350
1763099_s_at	14.7139	black	1038152	c2740	DEF=Hypothetical protein hypothetical protein c2740 1038152
1760960_s_at	14.6937	black	0	IG_1115806_1116029-r	DEF=intergenic region
1764673_s_at	14.676	black	0	IG_547572_547837-r	DEF=intergenic region
1762192_s_at	14.5875	black	0	IG_374106_374637-r	DEF=intergenic region
1768718_s_at	14.5862	black	916959	b0569	DEF=bacteriophage N4 receptor, subunit, inner membrane protein bacteriophage N4 adsorption protein B
1760021_s_at	14.5763	black	913915	b4223	DEF=orf, hypothetical protein hypothetical protein
1760381_s_at	14.5165	black	947250	b2648	DEF=orf, hypothetical protein pseudo
1763440_s_at	14.5071	black	0	IG_2264043_2264264-r	DEF=intergenic region
1763414_s_at	14.4684	black	916864	b2268	DEF=orf, hypothetical protein ribonuclease Z
1766555_s_at	14.4274	black	0	IG_3375056_3375449-r	DEF=intergenic region
1766771_s_at	14.4225	black	917140	b1352	DEF=hypothetical protein FtsZ inhibitor protein
1761811_s_at	14.4107	black	0	IG_3509764_3510271-f	DEF=intergenic region
1762705_s_at	14.4052	black	913999	b4196	DEF=probable hexulose-6-phosphate synthase 3-keto-L-gulonate-6-phosphate decarboxylase
1765056_s_at	14.336	black	2693812	ECs5363	DEF=hypothetical protein hypothetical protein ECs5363 2693812
1768293_at	14.3359	black	946752	b2274	DEF=orf, hypothetical protein predicted protein yfbO 946752
1760059_s_at	14.3269	black	0	IG_1689385_1689609-r	DEF=intergenic region
1763721_s_at	14.3043	black	948957	b4333	DEF=orf, hypothetical protein hypothetical protein
1765115_s_at	14.2781	black	0	IG_418409_418814-f	DEF=intergenic region
1764978_at	14.2175	black	945062	b2638	DEF=orf, hypothetical protein pseudo yfjU 945062
1760657_s_at	14.2085	black	0	IG_2288102_2288519-f	DEF=intergenic region
1766368_s_at	14.2055	black	947888	b3382	DEF=orf, hypothetical protein hypothetical protein
1768185_at	14.1259	black	945176	b0706	DEF=putative DNA ligase conserved protein ybfD 945176 0006313
1763428_s_at	14.0664	black	915405	b3696	DEF=putative replicase EC 2.7.- hypothetical protein
1759230_s_at	14.0036	black	948096	b3575	DEF=putative dehydrogenase 2,3-diketo-L-gulonate reductase
1759827_s_at	14.0031	black	0	IG_1647066_1647405-r	DEF=intergenic region
1760084_s_at	13.9164	black	913692	b4313	DEF=recombinase involved in phase variation; regulator for fimA tyrosine recombinase
1768137_s_at	13.8263	black	0	IG_1449374_1449620-r	DEF=intergenic region
1759197_s_at	13.8109	black	0	IG_1830007_1830451-r	DEF=intergenic region
1765210_s_at	13.779	black	0	IG_1166613_1166821-r	DEF=intergenic region
1759502_s_at	13.7765	black	0	IG_1241169_1241388-f	DEF=intergenic region
1762298_s_at	13.7155	black	915154	b2534	DEF=putative enzyme (3.4.-) hypothetical protein
1767016_at	13.7135	black	1040216	c4854	DEF=Hypothetical protein hypothetical protein c4854 1040216
1762302_s_at	13.7112	black	0	IG_1490196_1490493-r	DEF=intergenic region
1762765_s_at	13.7085	black	0	IG_1344767_1345001-f	DEF=intergenic region
1764511_s_at	13.6891	black	915611	b3568	DEF=putative xylose transport, membrane component putative membrane component of xylose transport system
1768193_s_at	13.6309	black	916418	b2884	DEF=orf, hypothetical protein hypothetical protein
1762284_s_at	13.626	black	946707	b2915	DEF=orf, hypothetical protein hypothetical protein
1765072_s_at	13.5734	black	916394	b2919	DEF=putative enzyme methylmalonyl-CoA decarboxylase
1767031_at	13.57	black	949100	b4299	DEF=putative regulator KpLE2 phage-like element; predicted DNA-binding transcriptional regulator yjhI 949100 0006350
1769160_s_at	13.5503	black	0	IG_2310770_2311103-f	DEF=intergenic region
1760416_at	13.5422	black	4056040	b0374	DEF=putative flagellin structural protein pseudo yaiT 4056040
1759259_at	13.5115	black	948829	b4301	DEF=putative epimerase KpLE2 phage-like element; predicted epimerase sgcE 948829 0005975
1760328_at	13.4622	black	0	b4285	DEF=putative transposase
1759979_s_at	13.3888	black	917383	ECs1937	DEF=phage superinfection exclusion protein phage superinfection exclusion protein
1767742_s_at	13.3712	black	0	IG_3708138_3708427-f	DEF=intergenic region
1763774_s_at	13.3169	black	947824	b3324	DEF=YheE general secretory pathway component, cryptic
1767893_s_at	13.2618	black	0	IG_1977240_1977776-r	DEF=intergenic region
1764966_at	13.2595	black	0	b2649	DEF=orf, hypothetical protein
1759454_s_at	13.2441	black	916187	b0514	DEF=hypothetical protein glycerate kinase II
1759620_s_at	13.2074	black	946934	Z1289	DEF=partial fimbrial usher protein predicted outer membrane usher protein
1760206_s_at	13.1402	black	912623	b1313	DEF=putative oxidoreductase putative oxidoreductase
1766238_s_at	13.0924	black	916009	b3270	DEF=putative transport system permease protein putative transport system permease protein
1760845_s_at	13.0891	black	959918	Z5814	DEF=orf; Unknown function hypothetical protein Z5814 959918
1764872_s_at	13.0428	black	0	IG_239085_239418-r	DEF=intergenic region
1761506_s_at	13.0275	black	0	IG_567871_568124-r	DEF=intergenic region
1768280_s_at	13.0264	black	915237	b2488	DEF=hydrogenase 4 Fe-S subunit hydrogenase 4 subunit H
1760578_s_at	13.025	black	0	IG_2311197_2311507-r	DEF=intergenic region
1764820_s_at	12.9902	black	917667	b0843	DEF=orf, hypothetical protein hypothetical protein
1763856_s_at	12.9894	black	0	IG_1710183_1710792-f	DEF=intergenic region
1767831_s_at	12.9425	black	916229	b3062	DEF=L-tartrate dehydratase, subunit B L(+)-tartrate dehydratase subunit beta
1759604_at	12.9404	black	944934	b0251	DEF=hypothetical transcriptional regulator CP4-6 prophage; predicted DNA-binding transcriptional regulator yafY 944934
1765461_s_at	12.8696	black	0	IG_294024_294362-f	DEF=intergenic region
1766369_s_at	12.8651	black	0	IG_1080037_1080569-r	DEF=intergenic region
1767445_s_at	12.8644	black	917633	b0813	DEF=putative transmembrane subunit threonine and homoserine efflux system
1766613_s_at	12.8323	black	0	IG_989580_989844-r	DEF=intergenic region
1762170_at	12.7808	black	947269	b2072	DEF=orf, hypothetical protein predicted protein yegK 947269
1766454_s_at	12.768	black	0	IG_522055_522484-f	DEF=intergenic region
1762100_s_at	12.7607	black	915898	b3394	DEF=orf, hypothetical protein hypothetical protein
1764819_s_at	12.7184	black	1040097	c4909	DEF=Hypothetical protein hypothetical protein c4909 1040097
1766961_s_at	12.7158	black	0	IG_3039091_3039332-r	DEF=intergenic region
1767660_s_at	12.6498	black	912310	b2005	DEF=orf, hypothetical protein hypothetical protein
1765821_s_at	12.6368	black	1036203	c0474	DEF=Hypothetical protein hypothetical protein c0474 1036203
1760024_s_at	12.6356	black	946285	b1772	DEF=putative kinase putative sugar kinase ydjH
1760608_s_at	12.575	black	1036211	b0359	DEF=putative transferase putative transferase
1766273_s_at	12.5611	black	0	IG_2055597_2056048-r	DEF=intergenic region
1760375_at	12.5044	black	945871	b1289	DEF=orf, hypothetical protein conserved protein ycjD 945871 0003677
1763126_s_at	12.5007	black	1038248	c0746	DEF=Hypothetical protein hypothetical protein c0746 1038248
1765581_at	12.4672	black	945520	b0901	DEF=orf, hypothetical protein conserved protein ycaK 945520 0055114
1762172_at	12.4539	black	947417	b1365	DEF=orf, hypothetical protein Rac prophage; conserved protein ynaK 947417 0003677
1762853_at	12.4182	black	948099	b3583	DEF=putative epimerasealdolase L-ribulose-5-phosphate 4-epimerase sgbE 948099 0005975
1760860_s_at	12.4044	black	0	IG_2042647_2042884-r	DEF=intergenic region
1759190_s_at	12.3725	black	0	IG_3067828_3068184-r	DEF=intergenic region
1765468_s_at	12.3603	black	0	IG_576109_576620-r	DEF=intergenic region
1762331_s_at	12.3504	black	915267	b2470	DEF=AcrD aminoglycoside
1763989_at	12.2767	black	946836	b2363	DEF=orf, hypothetical protein CPS-53 (KpLE1) prophage; predicted protein yfdT 946836
1764879_at	12.238	black	0	b4281	DEF=orf, hypothetical protein
1766654_s_at	12.2346	black	0	IG_1490196_1490493-f	DEF=intergenic region
1760895_s_at	12.231	black	946274	b1769	DEF=putative transport protein metabolite transporter
1766740_s_at	12.2107	black	0	IG_1357266_1357513-f	DEF=intergenic region
1765361_s_at	12.203	black	915095	b3882	DEF=putative dehydrogenase putative dehydrogenase
1763226_at	12.1916	black	915588	ECs4472	DEF=hypothetical protein hypothetical protein ECs4472 915588
1767868_s_at	12.1432	black	914278	ECs5063	DEF=hypothetical protein multidrug efflux system protein MdtO
1763391_s_at	12.0674	black	914633	b0476	DEF=putative lipase acetyl esterase
1765602_s_at	12.0512	black	0	IG_1211227_1211925-r	DEF=intergenic region
1766416_at	12.0482	black	1039850	c4610	DEF=Hypothetical protein hypothetical protein c4610 1039850
1759868_s_at	12.0053	black	0	IG_3509764_3510271-r	DEF=intergenic region
1768174_s_at	11.9746	black	0	IG_330721_331594-r	DEF=intergenic region
1764687_s_at	11.9642	black	0	IG_3382809_3383121-f	DEF=intergenic region
1766645_s_at	11.9334	black	948169	b3656	DEF=orf, hypothetical protein alpha-xylosidase YicI
1769038_s_at	11.9326	black	0	IG_246503_246711-r	DEF=intergenic region
1766257_s_at	11.8798	black	944948	c2474	DEF=Transposase transposase
1762397_s_at	11.8634	black	945150	b0516	DEF=putative hydantoin utilization protein allantoate amidohydrolase
1769207_s_at	11.8554	black	0	IG_569652_570115-r	DEF=intergenic region
1763262_at	11.8495	black	945925	b1359	DEF=orf, hypothetical protein Rac prophage; conserved protein ydaU 945925
1768841_s_at	11.8192	black	0	IG_791279_791538-r	DEF=intergenic region
1760818_s_at	11.803	black	0	IG_1821310_1821538-r	DEF=intergenic region
1760229_s_at	11.795	black	0	IG_2304775_2304991-f	DEF=intergenic region
1761190_s_at	11.7929	black	0	IG_3491387_3491647-f	DEF=intergenic region
1769062_s_at	11.7762	black	915594	b3589	DEF=putative oxidoreductase putative alcohol dehydrogenase
1764372_s_at	11.7267	black	0	IG_3315931_3316277-r	DEF=intergenic region
1759328_s_at	11.7241	black	914155	b4133	DEF=transcriptional activator of cad operon DNA-binding transcriptional activator CadC
1763695_s_at	11.7201	black	915065	b3906	DEF=positive regulator for rhaRS operon transcriptional activator RhaR
1760203_s_at	11.66	black	0	IG_3183147_3183429-f	DEF=intergenic region
1765294_s_at	11.6558	black	0	IG_3326342_3326603-f	DEF=intergenic region
1764144_s_at	11.646	black	1038192	c4808	DEF=Hypothetical protein hypothetical protein
1768745_x_at	11.6397	black	1035113	c1406	DEF=Hypothetical protein hypothetical protein c1406 1035113
1767924_s_at	11.6298	black	916470	b2853	DEF=orf, hypothetical protein hypothetical protein
1760188_at	11.6142	black	1037236	c5398	DEF=Hypothetical protein hypothetical protein c5398 1037236
1768644_s_at	11.5813	black	0	IG_1445308_1445539-f	DEF=intergenic region
1765569_s_at	11.5142	black	915695	b2322	DEF=putative transport protein hypothetical protein
1760288_s_at	11.4603	black	0	IG_1524056_1524270-f	DEF=intergenic region
1767106_s_at	11.3485	black	0	IG_1294422_1294668-f	DEF=intergenic region
1764257_s_at	11.2982	black	913782	b1771	DEF=hypothetical protein hypothetical protein
1768125_s_at	11.2916	black	912976	c2119	DEF=Hypothetical protein pseudo
1767634_s_at	11.2841	black	945743	b1201	DEF=putative sensor-type regulator DNA-binding transcriptional regulator DhaR
1759713_s_at	11.262	black	0	IG_3633524_3633837-f	DEF=intergenic region
1760586_s_at	11.2471	black	0	IG_2980205_2980518-f	DEF=intergenic region
1768543_s_at	11.217	black	0	IG_1753166_1753721-f	DEF=intergenic region
1766957_at	11.1868	black	945927	b1361	DEF=orf, hypothetical protein pseudo ydaW 945927
1760780_s_at	11.1464	black	916237	b3050	DEF=putative oxidoreductase putative oxidoreductase
1760715_s_at	11.1428	black	917027	b0629	DEF=putative transcriptional regulator LYSR-type putative DNA-binding transcriptional regulator
1768576_at	11.138	black	945767	b1202	DEF=putative adhesion and penetration protein predicted adhesin ycgV 945767 0007155
1764290_s_at	11.1273	black	917304	b1502	DEF=putative adhesin; similar to FimH protein putative adhesin
1759638_s_at	11.1239	black	947403	b2358	DEF=orf, hypothetical protein hypothetical protein
1769140_at	11.1189	black	948366	b3875	DEF=orf, hypothetical protein predicted outer membrane porin L ompL 948366 0006810
1761757_at	11.0999	black	946568	b2427	DEF=orf, hypothetical protein predicted DNA-binding transcriptional regulator yfeT 946568 0005975
1762271_s_at	11.034	black	915431	b3667	DEF=regulator of uhpT regulatory protein UhpC
1766055_s_at	11.0321	black	914087	b1872	DEF=biotin sulfoxide reductase 2 biotin sulfoxide reductase 2
1764296_s_at	11.0159	black	0	IG_1360493_1360766-r	DEF=intergenic region
1766037_s_at	11.0082	black	0	IG_2520498_2520748-f	DEF=intergenic region
1760142_s_at	10.9747	black	0	IG_7960_8237-r	DEF=intergenic region
1767974_s_at	10.9601	black	0	IG_2011037_2011250-f	DEF=intergenic region
1764166_at	10.9448	black	1039688	c4584	DEF=Hypothetical protein hypothetical protein c4584 1039688
1767412_s_at	10.8944	black	912546	b1315	DEF=putative dehydrogenase putative dehydrogenase
1765604_s_at	10.8222	black	0	IG_1062999_1063258-r	DEF=intergenic region
1762631_s_at	10.8213	black	0	IG_3010415_3010634-r	DEF=intergenic region
1763232_s_at	10.7922	black	0	IG_2802483_2802835-r	DEF=intergenic region
1762696_s_at	10.766	black	1038943	IG_2471267_2471539-r	DEF=intergenic region hypothetical protein c3192 1038943 0006260
1768063_s_at	10.7081	black	947825	b3323	DEF=putative export protein A for general secretion pathway (GSP) general secretory pathway component, cryptic
1766449_s_at	10.6786	black	913989	b4182	DEF=putative alpha helical protein putative alpha helical protein
1760469_s_at	10.6551	black	1035605	c0784	DEF=Hypothetical protein hypothetical protein c0784 1035605
1764479_at	10.651	black	945850	b1268	DEF=orf, hypothetical protein predicted inner membrane protein yciQ 945850
1769119_s_at	10.6444	black	914481	b0326	DEF=orf, hypothetical protein hypothetical protein
1767970_s_at	10.6286	black	0	IG_474386_474602-f	DEF=intergenic region
1761220_s_at	10.6125	black	914003	b4194	DEF=orf, hypothetical protein L-ascorbate-specific enzyme IIB component of PTS
1767989_s_at	10.5981	black	947401	Z4258	DEF=partial putative transcriptional regulator LYSR-type putative transcriptional regulator YgfI
1759828_s_at	10.5875	black	913269	b0549	DEF=orf, hypothetical protein hypothetical protein
1759600_s_at	10.5857	black	1036300	c0705	DEF=Hypothetical protein hypothetical protein c0705 1036300
1762295_s_at	10.5798	black	0	IG_1463086_1463415-f	DEF=intergenic region
1759468_at	10.5567	black	945924	b1358	DEF=orf, hypothetical protein Rac prophage; predicted protein ydaT 945924
1765494_s_at	10.526	black	0	IG_1014683_1014937-r	DEF=intergenic region
1765698_s_at	10.5207	black	1036215	c0463	DEF=Hypothetical protein hypothetical protein c0463 1036215
1761230_s_at	10.4806	black	0	IG_2350395_2350666-r	DEF=intergenic region
1766496_s_at	10.4532	black	0	IG_3126037_3126286-r	DEF=intergenic region
1762279_s_at	10.4464	black	0	IG_2983618_2983868-r	DEF=intergenic region
1766407_s_at	10.4351	black	0	IG_2009102_2009369-r	DEF=intergenic region
1762951_s_at	10.4347	black	961051	Z4985	DEF=orf; Unknown function hypothetical protein
1759356_at	10.4005	black	947676	b0262	DEF=putative ATP-binding component of a transport system CP4-6 prophage; predicted ferric transporter subunit afuC 947676 0006810
1765368_s_at	10.3932	black	0	IG_854968_855185-r	DEF=intergenic region
1762625_at	10.3782	black	946231	b1733	DEF=orf, hypothetical protein conserved protein chbG 946231
1769000_s_at	10.3699	black	913715	c2180	DEF=Hypothetical protein hypothetical protein
1762999_s_at	10.347	black	0	IG_3543836_3544194-f	DEF=intergenic region
1766818_s_at	10.3358	black	914506	b0349	DEF=2-hydroxy-6-ketonona-2,4-dienedioic acid hydrolase 2-hydroxy-6-ketonona-2,4-dienedioic acid hydrolase
1761358_s_at	10.3352	black	0	IG_2775804_2776166-r	DEF=intergenic region
1764225_at	10.3339	black	946450	b3027	DEF=orf, hypothetical protein conserved inner membrane protein ygiZ 946450 0005886
1761504_s_at	10.2842	black	947886	Z4735	DEF=orf, hypothetical protein fructoselysine 6-kinase
1768560_s_at	10.2829	black	0	IG_3183982_3184202-f	DEF=intergenic region
1765455_s_at	10.1528	black	0	IG_953690_954094-f	DEF=intergenic region
1760249_s_at	10.1269	black	915620	b3561	DEF=orf, hypothetical protein hypothetical protein
1760676_s_at	10.0988	black	916370	c3513	DEF=Putative conserved protein hypothetical protein
1761967_at	10.0886	black	945207	b1372	DEF=putative membrane protein Rac prophage; predicted tail fiber protein stfR 945207 0005198
1764159_s_at	10.0723	black	916483	b2847	DEF=putative sensory transducer putative sensory transducer
1766453_s_at	10.0194	black	0	IG_804988_805220-f	DEF=intergenic region
1762730_at	9.95555	black	949013	b3800	DEF=putative arylsulfatase regulator predicted regulator of arylsulfatase activity aslB 949013 0003824
1762321_s_at	9.89109	black	0	IG_1278572_1279086-f	DEF=intergenic region
1768979_s_at	9.88097	black	914430	c0408	DEF=Hypothetical protein hypothetical protein
1766498_at	9.86935	black	946123	b2623	DEF=putative histone CP4-57 prophage; predicted protein yfjH 946123
1766219_s_at	9.84857	black	0	IG_3489935_3490204-r	DEF=intergenic region
1764691_at	9.8404	black	0	b1240	DEF=orf, hypothetical protein
1765565_s_at	9.80949	black	912747	b2010	DEF=penicillin binding protein 6b D-alanyl-D-alanine carboxypeptidase
1765009_s_at	9.78798	black	912976	b1720	DEF=ankyrin repeat protein pseudo
1761510_s_at	9.77171	black	912359	b1336	DEF=putative pump protein predicted cryptic aminobenzoyl-glutamate transporter
1766418_at	9.74685	black	947741	b3215	DEF=putative chaperone predicted periplasmic chaperone protein yhcA 947741 0007047
1768508_s_at	9.68775	black	913124	b1735	DEF=negative transcriptional regulator of cel operon DNA-binding transcriptional regulator ChbR
1760735_s_at	9.63855	black	914277	b1459	DEF=orf, hypothetical protein H repeat-containing protein
1768410_s_at	9.57409	black	917099	b0704	DEF=orf, hypothetical protein hypothetical protein
1769034_s_at	9.57283	black	0	IG_1431699_1432014-f	DEF=intergenic region
1759647_s_at	9.5286	black	913252	b0561	DEF=orf, hypothetical protein putative DNA packaging protein of prophage
1761572_s_at	9.52473	black	914404	b0282	DEF=putative transcriptional regulator LYSR-type hypothetical protein
1768813_s_at	9.5087	black	0	IG_281208_281480-f	DEF=intergenic region
1769201_s_at	9.48931	black	0	IG_3628233_3628597-f	DEF=intergenic region
1767283_s_at	9.46419	black	0	IG_2689361_2689675-f	DEF=intergenic region
1762262_at	9.45737	black	1037208	c5411	DEF=Hypothetical protein hypothetical protein c5411 1037208
1766444_s_at	9.45323	black	0	IG_2769637_2769860-f	DEF=intergenic region
1763909_s_at	9.35693	black	945992	b1549	DEF=orf, hypothetical protein hypothetical protein
1764405_s_at	9.35026	black	917082	b0682	DEF=orf, hypothetical protein hypothetical protein
1768004_s_at	9.33201	black	1040469	c0569	DEF=Hypothetical protein hypothetical protein c0569 1040469
1764015_s_at	9.32727	black	916897	b2305	DEF=orf, hypothetical protein hypothetical protein
1767257_s_at	9.30213	black	0	IG_1675928_1676450-f	DEF=intergenic region
1763950_s_at	9.29184	black	0	IG_2031525_2032042-r	DEF=intergenic region
1766861_at	9.29035	black	948997	b0038	DEF=l-carnitine dehydratase crotonobetainyl CoA:carnitine CoA transferase caiB 948997 0008152
1767362_s_at	9.24874	black	0	IG_1327137_1327355-r	DEF=intergenic region
1766926_s_at	9.24796	black	960127	c4960	DEF=Hypothetical protein hypothetical protein
1766805_at	9.20216	black	947460	b2716	DEF=6-phospho-beta-glucosidase; cryptic cryptic 6-phospho-beta-glucosidase ascB 947460 0005975
1765077_at	9.17686	black	947064	b2577	DEF=putative transcriptional regulator LYSR-type predicted DNA-binding transcriptional regulator yfiE 947064 0006350
1762466_at	9.16648	black	946921	b2444	DEF=orf, hypothetical protein CPZ-55 prophage; predicted protein yffM 946921
1764982_s_at	9.16119	black	0	IG_3606628_3606847-r	DEF=intergenic region
1761052_s_at	9.07478	black	0	IG_1977240_1977776-f	DEF=intergenic region
1764957_s_at	9.04791	black	915922	b3373	DEF=orf, hypothetical protein fructoselysine 3-epimerase
1760088_s_at	9.0275	black	0	IG_1272823_1273147-r	DEF=intergenic region
1767494_s_at	9.0142	black	915099	b3874	DEF=putative resistance protein (transport) putative resistance protein
1760815_s_at	8.99743	black	915417	b3676	DEF=orf, hypothetical protein hypothetical protein
1762890_s_at	8.97409	black	0	IG_303407_303718-r	DEF=intergenic region
1766972_s_at	8.9717	black	914467	Z0406	DEF=orf; Unknown function hypothetical protein
1763771_s_at	8.96727	black	0	IG_292173_292443-f	DEF=intergenic region
1768281_s_at	8.95982	black	0	IG_3381904_3382337-f	DEF=intergenic region
1759679_s_at	8.95233	black	0	IG_1876765_1877030-r	DEF=intergenic region
1760015_s_at	8.94286	black	1036872	c4195	DEF=Hypothetical protein hypothetical protein c4195 1036872
1767190_s_at	8.93402	black	912996	b2956	DEF=putative alpha helix chain putative alpha helix chain
1763355_at	8.89896	black	947228	b2755	DEF=orf, hypothetical protein conserved protein ygbT 947228
1763958_s_at	8.8947	black	916219	b3883	DEF=putative kinase putative kinase
1761562_at	8.89312	black	946120	b1569	DEF=regulator of dicB Qin prophage; DNA-binding transcriptional regulator for DicB dicC 946120 0006350
1766094_s_at	8.84343	black	0	IG_567871_568124-f	DEF=intergenic region
1768622_s_at	8.82314	black	0	IG_1710183_1710792-r	DEF=intergenic region
1759544_s_at	8.80654	black	958854	Z4034	DEF=orf; Unknown function hypothetical protein Z4034 958854
1767243_s_at	8.80163	black	916476	b2839	DEF=positive regulator for lys DNA-binding transcriptional regulator LysR
1765021_s_at	8.79965	black	1038334	c2806	DEF=Hypothetical protein hypothetical protein c2806 1038334
1768041_s_at	8.79904	black	0	IG_1638685_1639362-f	DEF=intergenic region
1764761_s_at	8.77716	black	961054	b4455	DEF=small toxic membrane polypeptide toxic polypeptide, small
1759681_s_at	8.77504	black	0	IG_289530_289872-f	DEF=intergenic region
1765612_s_at	8.77142	black	914218	b1456	DEF=RhsE Rhs core protein
1765280_s_at	8.76551	black	914928	b2540	DEF=ferredoxin subunit of phenylpropionate dioxygenase 3-phenylpropionate dioxygenase ferredoxin subunit
1763299_s_at	8.76094	black	915072	Z5439	DEF=orf, hypothetical protein hypothetical protein
1763244_s_at	8.73859	black	1036649	c2206	DEF=Hypothetical protein hypothetical protein c2206 1036649
1763799_s_at	8.73622	black	0	IG_113220_113443-r	DEF=intergenic region
1762497_s_at	8.695	black	916503	b2823	DEF=prepilin peptidase dependent protein C hypothetical protein
1762242_s_at	8.60702	black	0	c1129	DEF=Hypothetical protein
1759355_s_at	8.57628	black	0	IG_2558919_2559387-r	DEF=intergenic region
1760219_s_at	8.49638	black	0	IG_3621414_3622008-r	DEF=intergenic region
1765177_s_at	8.4872	black	957491	Z0655	DEF=orf; Unknown function hypothetical protein Z0655 957491
1766125_s_at	8.35135	black	1035864	c0547	DEF=Hypothetical protein hypothetical protein c0547 1035864
1760806_s_at	8.34667	black	917139	b1351	DEF=RacC protein hypothetical protein
1763806_s_at	8.34488	black	1035779	c1010	DEF=Hypothetical protein hypothetical protein c1010 1035779
1768917_s_at	8.33008	black	947174	b3026	DEF=putative 2-component sensor protein QseC
1761177_s_at	8.30275	black	915183	b3815	DEF=orf, hypothetical protein hypothetical protein
1763657_s_at	8.29746	black	0	c3928	DEF=Hypothetical protein
1767880_s_at	8.25952	black	1038603	c2964	DEF=Hypothetical protein hypothetical protein c2964 1038603
1761129_s_at	8.25417	black	0	IG_2558919_2559387-f	DEF=intergenic region
1766074_s_at	8.2132	black	0	IG_3633524_3633837-r	DEF=intergenic region
1763803_at	8.15238	black	1040056	c4626	DEF=Hypothetical protein hypothetical protein c4626 1040056
1767762_s_at	8.14723	black	0	IG_121552_122091-r	DEF=intergenic region
1764560_s_at	8.0628	black	0	IG_29196_29650-r	DEF=intergenic region
1759968_s_at	8.05958	black	0	IG_3491387_3491647-r	DEF=intergenic region
1767137_s_at	8.05377	black	948959	ECs5433	DEF=hypothetical protein hypothetical protein
1767912_s_at	8.03364	black	916957	c0653	DEF=Hypothetical protein ybcH precursor hypothetical protein
1766610_s_at	8.0148	black	0	IG_284393_284618-r	DEF=intergenic region
1760733_s_at	7.95443	black	917131	Z2795	DEF=orf; Unknown function hypothetical protein
1766541_s_at	7.93716	black	1036727	c0438	DEF=Hypothetical protein hypothetical protein c0438 1036727
1761440_s_at	7.92921	black	913369	b1595	DEF=putative transcriptional regulator LYSR-type putative transcriptional regulator LYSR-type
1763978_s_at	7.85333	black	0	IG_2561138_2561596-r	DEF=intergenic region
1763074_s_at	7.85222	black	0	IG_569652_570115-f	DEF=intergenic region
1764667_s_at	7.83116	black	915430	b3668	DEF=sensor histidine protein kinase phosphorylates UhpA sensory histidine kinase UhpB
1759098_s_at	7.80994	black	914277	b1458	DEF=orf, hypothetical protein H repeat-containing protein
1760260_s_at	7.7956	black	0	IG_1271073_1271341-r	DEF=intergenic region
1763567_at	7.79467	black	946595	b2233	DEF=putative ATP-binding component of a transport system adhesin yfaL 946595 0019867
1766469_s_at	7.78822	black	945306	b0701	DEF=orf, hypothetical protein rhsC protein in rhs element, interrupted
1760519_s_at	7.74967	black	913275	b0544	DEF=orf, hypothetical protein hypothetical protein
1765566_s_at	7.72731	black	915628	b2389	DEF=orf, hypothetical protein hypothetical protein
1763005_at	7.66791	black	949004	b0253	DEF=putative GTP-binding protein CP4-6 prophage; predicted GTP-binding protein ykfA 949004 0005622
1760490_x_at	7.62897	black	960467	b4421	DEF=small toxic polypeptide toxic polypeptide, small
1766002_at	7.62872	black	944956	b0300	DEF=putative ARAC-type regulatory protein pseudo ykgA 944956
1769063_s_at	7.6224	black	1035158	c1442	DEF=Unknown protein encoded within prophage hypothetical protein
1766440_s_at	7.62215	black	0	IG_2547427_2547665-f	DEF=intergenic region
1768752_at	7.59255	black	2847726	b2115	DEF=molybdate metabolism regulator, first fragment pseudo yehH 2847726
1759153_s_at	7.57209	black	912732	b2004	DEF=putative structural protein hypothetical protein
1759944_s_at	7.56065	black	0	IG_1416266_1416571-r	DEF=intergenic region
1768130_s_at	7.56057	black	914001	b4195	DEF=putative PTS system enzyme II A component L-ascorbate-specific enzyme IIA component of PTS
1767060_s_at	7.54869	black	0	IG_2175231_2175531-r	DEF=intergenic region
1759678_s_at	7.52906	black	916287	c5052	DEF=Hypothetical protein yjcC hypothetical protein
1766557_s_at	7.52694	black	0	IG_2039141_2039396-r	DEF=intergenic region
1765520_s_at	7.47545	black	913730	b0994	DEF=part of regulation of tor operon, periplasmic periplasmic sensory protein associated with the TorRS two-component regulatory system
1766427_s_at	7.4738	black	0	IG_924764_925106-r	DEF=intergenic region
1768886_at	7.46749	black	946130	b1579	DEF=putative transposase pseudo intQ 946130
1766689_s_at	7.46639	black	958691	Z4614	DEF=orf; Unknown function hypothetical protein Z4614 958691
1766945_at	7.4641	black	1036527	c4813	DEF=Hypothetical protein hypothetical protein c4813 1036527
1767194_s_at	7.44893	black	913440	b0040	DEF=probable carnitine transporter L-carnitine
1759227_s_at	7.44489	black	915084	b3889	DEF=orf, hypothetical protein hypothetical protein
1768420_s_at	7.43763	black	0	IG_2463028_2463320-f	DEF=intergenic region
1769292_s_at	7.3973	black	0	IG_2901397_2902768-r	DEF=intergenic region
1767865_s_at	7.36396	black	916169	b3060	DEF=putative transcriptional regulator LYSR-type transcriptional activator TtdR
1767147_at	7.35912	black	948880	b4345	DEF=component of McrBC 5-methylcytosine restriction system, expands range of sequences restricted 5-methylcytosine-specific restriction enzyme McrBC, subunit McrC mcrC 948880 0009307
1761368_at	7.29499	black	946426	b2362	DEF=orf, hypothetical protein CPS-53 (KpLE1) prophage; predicted protein yfdS 946426
1765069_s_at	7.29463	black	0	IG_879710_879949-f	DEF=intergenic region
1759612_s_at	7.26719	black	0	IG_341732_342107-r	DEF=intergenic region
1761656_s_at	7.24489	black	916039	b3585	DEF=putative transcriptional regulator LYSR-type putative transcriptional regulator LYSR-type
1759133_s_at	7.19231	black	912493	b1320	DEF=putative LACI-type transcriptional regulator putative LACI-type transcriptional regulator
1767368_s_at	7.18582	black	1039310	c3433	DEF=Hypothetical protein hypothetical protein c3433 1039310
1768413_s_at	7.18036	black	945659	Z2476	DEF=orf, hypothetical protein putative sucrose phosphorylase
1762739_s_at	7.14502	black	0	IG_2985099_2985497-r	DEF=intergenic region
1767132_s_at	7.12968	black	913156	Z1972	DEF=partial putative adhesion protein hypothetical protein
1767811_s_at	7.12772	black	916148	b3137	DEF=tagatose-bisphosphate aldolase 2 tagatose-bisphosphate aldolase
1765300_s_at	7.10624	black	947513	b0310	DEF=orf, hypothetical protein hypothetical protein
1767070_s_at	7.07549	black	947207	b2739	DEF=orf, hypothetical protein hypothetical protein
1765005_s_at	7.06819	black	0	IG_528355_528868-f	DEF=intergenic region
1768403_at	7.06364	black	2693828	ECs5564	DEF=hypothetical protein hypothetical protein ECs5564 2693828
1762769_at	7.06205	black	947522	b3043	DEF=putative fimbrial-like protein predicted fimbrial-like adhesin protein ygiL 947522 0007155
1764066_s_at	7.01688	black	914323	b4029	DEF=orf, hypothetical protein hypothetical protein
1763676_s_at	6.99583	black	0	IG_292173_292443-r	DEF=intergenic region
1760344_s_at	6.96669	black	0	IG_343158_343399-f	DEF=intergenic region
1765681_s_at	6.9627	black	913254	Z1881	DEF=unknown protein encoded by prophage CP-933X hypothetical protein
1759157_s_at	6.90778	black	961029	Z4999	DEF=orf; Unknown function hypothetical protein Z4999 961029
1765158_s_at	6.89886	black	0	IG_3232097_3232379-r	DEF=intergenic region
1759070_s_at	6.89479	black	0	IG_1349064_1349430-r	DEF=intergenic region
1759390_s_at	6.86887	black	914469	b0319	DEF=orf, hypothetical protein hypothetical protein
1765980_s_at	6.7749	black	914180	b4130	DEF=putative peptide transporter putative peptide transporter
1767745_s_at	6.74425	black	913196	c1630	DEF=Putative conserved protein hypothetical protein
1763760_at	6.72707	black	948388	b3898	DEF=frv operon protein predicted endo-1,4-beta-glucanase frvX 948388 0016787
1760037_s_at	6.70678	black	914496	b0341	DEF=cyanate transport putative cyanate transporter
1764642_s_at	6.70022	black	0	IG_688237_688565-r	DEF=intergenic region
1765860_s_at	6.69042	black	914707	b2715	DEF=PTS system enzyme II ABC (asc), cryptic, transports specific beta-glucosides cellobiose
1765511_s_at	6.64997	black	913446	b0044	DEF=putative ferredoxin putative ferredoxin
1759418_at	6.63346	black	945923	b1357	DEF=orf, hypothetical protein Rac prophage; predicted DNA-binding transcriptional regulator ydaS 945923 0003677
1765768_s_at	6.63326	black	0	IG_1073235_1073464-f	DEF=intergenic region
1760155_s_at	6.62626	black	0	IG_2404662_2405580-f	DEF=intergenic region
1761216_s_at	6.60692	black	913253	b0560	DEF=bacteriophage DNA packaging protein terminase small subunit
1766715_s_at	6.60327	black	913544	b0992	DEF=orf, hypothetical protein hypothetical protein
1766941_s_at	6.59569	black	0	IG_1269147_1269460-f	DEF=intergenic region
1766065_s_at	6.51998	black	917017	c0709	DEF=(Citrate (pro-3S)-lyase) ligase [citrate [pro-3S]-lyase] ligase
1761733_s_at	6.51746	black	0	IG_3645282_3646157-f	DEF=intergenic region
1767785_s_at	6.51204	black	0	IG_1584511_1584843-r	DEF=intergenic region
1764389_s_at	6.46749	black	0	IG_1668977_1669372-r	DEF=intergenic region
1759738_s_at	6.46237	black	0	IG_1642368_1642674-r	DEF=intergenic region
1759762_s_at	6.45916	black	914906	c4498	DEF=IS1 protein InsB IS1 protein InsB
1761447_s_at	6.44708	black	947566	b0702	DEF=orf, hypothetical protein hypothetical protein
1759639_s_at	6.43061	black	0	IG_1049754_1050185-f	DEF=intergenic region
1761930_s_at	6.42779	black	0	IG_284393_284618-f	DEF=intergenic region
1765875_s_at	6.41976	black	917317	b1509	DEF=putative ATP-binding component of a transport system and adhesin protein putative ATP-binding component of a transport system and adhesin protein
1759858_x_at	6.38002	black	1038818	c1062	DEF=Hypothetical protein hypothetical protein c1062 1038818
1759890_s_at	6.32077	black	914919	b2541	DEF=2,3-dihydroxy-2,3-dihydrophenylpropionate dehydrogenase 2,3-dihydroxy-2,3-dihydrophenylpropionate dehydrogenase
1766298_at	6.31763	black	946156	b1653	DEF=member of ATP-dependent helicase superfamily II predicted ATP-dependent helicase lhr 946156 0000166
1760802_s_at	6.30874	black	913993	b4198	DEF=putative epimerasealdolase L-ribulose-5-phosphate 4-epimerase
1760581_s_at	6.29601	black	0	IG_2474199_2474713-r	DEF=intergenic region
1763407_at	6.22954	black	945707	b1153	DEF=hypothetical protein e14 prophage; conserved protein ymfQ 945707
1760998_s_at	6.22472	black	916010	b3269	DEF=putative transport system permease protein putative transport system permease protein
1767764_s_at	6.21875	black	0	IG_248135_248357-r	DEF=intergenic region
1768980_s_at	6.20892	black	1040082	c3865	DEF=Hypothetical protein hypothetical protein c3865 1040082
1768416_s_at	6.17825	black	948098	b3581	DEF=probable 3-hexulose 6-phosphate synthase 3-keto-L-gulonate-6-phosphate decarboxylase
1767547_s_at	6.16765	black	0	IG_606607_607058-r	DEF=intergenic region
1763436_s_at	6.14942	black	0	IG_576109_576620-f	DEF=intergenic region
1765404_s_at	6.12933	black	0	IG_1642927_1643142-r	DEF=intergenic region
1766605_at	6.11424	black	0	b1935	DEF=orf, hypothetical protein
1766060_s_at	6.11311	black	916420	Z4224	DEF=putative oxidoreductase, Fe-S subunit putative oxidoreductase Fe-S subunit
1766041_s_at	6.10931	black	1035967	c1980	DEF=Hypothetical protein hypothetical protein c1980 1035967
1762858_s_at	6.0896	black	912369	c2438	DEF=Hypothetical protein hypothetical protein
1763292_s_at	6.05563	black	0	IG_714422_714634-f	DEF=intergenic region
1761176_s_at	6.03872	black	913589	b4356	DEF=putative transport protein, cryptic, orf, joins former yjiZ and yjjL putative transport protein
1763134_s_at	6.00444	black	0	IG_2520498_2520748-r	DEF=intergenic region
1759584_s_at	5.96538	black	0	IG_2529254_2529482-f	DEF=intergenic region
1761702_s_at	5.9644	black	0	IG_2875642_2876591-r	DEF=intergenic region
1766141_s_at	5.92973	black	1036810	c2266	DEF=Hypothetical protein hypothetical protein c2266 1036810
1768121_s_at	5.90021	black	0	IG_1993383_1993840-r	DEF=intergenic region
1769217_at	5.89953	black	945321	b0715	DEF=putative transport protein predicted regulator abrB 945321 0005886
1764558_s_at	5.88526	black	961589	Z4773	DEF=orf; Unknown function hypothetical protein Z4773 961589
1765002_s_at	5.85535	black	914013	b4190	DEF=orf, hypothetical protein esterase
1759533_at	5.84869	black	946907	b2430	DEF=putative beta-lactamase predicted periplasmic esterase yfeW 946907
1762804_s_at	5.83619	black	0	IG_1524056_1524270-r	DEF=intergenic region
1767727_s_at	5.82201	black	0	IG_668152_668518-f	DEF=intergenic region
1768378_s_at	5.82133	black	0	IG_2001630_2001894-f	DEF=intergenic region
1763960_s_at	5.80752	black	0	IG_1819644_1819941-r	DEF=intergenic region
1762694_s_at	5.79462	black	0	IG_268188_268512-r	DEF=intergenic region
1766025_s_at	5.77617	black	916061	c3971	DEF=Hypothetical protein yhcC hypothetical protein
1760319_s_at	5.74444	black	916944	c0643	DEF=Hypothetical protein ybcI hypothetical protein
1762063_at	5.74037	black	946208	b1366	DEF=orf, hypothetical protein pseudo ydaY 946208
1761497_s_at	5.73353	black	913435	b0036	DEF=carnitine racemase carnitinyl-CoA dehydratase
1768603_s_at	5.71454	black	916430	b2868	DEF=putative dehydrogenase xanthine dehydrogenase subunit XdhC
1767331_s_at	5.70965	black	914944	Z5563	DEF=heat shock protein C HtrC
1761124_s_at	5.69888	black	0	IG_1590467_1590688-f	DEF=intergenic region
1768502_x_at	5.69651	black	1038546	c1008	DEF=Hypothetical protein hypothetical protein c1008 1038546
1764481_s_at	5.67818	black	913572	b1877	DEF=orf, hypothetical protein hypothetical protein
1765499_at	5.66017	black	946829	b4297	DEF=putative dehydratase KpLE2 phage-like element; predicted dehydratase yjhG 946829 0008152
1760492_s_at	5.64641	black	912971	b1029	DEF=orf, hypothetical protein hypothetical protein
1763573_at	5.64094	black	947469	b2970	DEF=putative general secretion pathway for protein export (GSP) pseudo yghF 947469
1763548_s_at	5.62692	black	0	IG_2040921_2041489-r	DEF=intergenic region
1767128_s_at	5.62539	black	0	IG_696357_696735-f	DEF=intergenic region
1767023_s_at	5.61837	black	913634	c5416	DEF=Hypothetical protein hypothetical protein
1761646_at	5.55915	black	946561	b2043	DEF=orf, hypothetical protein predicted colanic acid biosynthesis protein wcaM 946561 0009103
1762697_s_at	5.54956	black	915610	b3569	DEF=putative regulator of xyl operon putative regulator of xyl operon
1766120_s_at	5.51456	black	917013	b0614	DEF=orf, hypothetical protein 2'-(5''-triphosphoribosyl)-3'-dephospho-CoA:apo-citrate lyase
1763205_at	5.48257	black	947543	b1368	DEF=putative alpha helix protein pseudo ynaA 947543
1759138_s_at	5.4294	black	916431	b2874	DEF=putative kinase carbamate kinase
1760169_s_at	5.41581	black	912301	b1346	DEF=putative lambdoid prophage Rac excisionase hypothetical protein
1766655_s_at	5.38992	black	0	IG_1932629_1932862-r	DEF=intergenic region
1766762_s_at	5.32719	black	914320	b4031	DEF=xylose-proton symport D-xylose transporter XylE
1765781_s_at	5.32331	black	913268	Z1873	DEF=endodeoxyribonuclease RUS (Holliday junction resolvase) of prophage CP-933X endodeoxyribonuclease RUS
1760598_s_at	5.28483	black	961145	b1354	DEF=orf, hypothetical protein hypothetical protein Z2403 961145
1759237_s_at	5.27902	black	0	IG_324589_324800-f	DEF=intergenic region
1762218_s_at	5.27605	black	0	IG_2021701_2021989-r	DEF=intergenic region
1759775_at	5.26341	black	948437	b3947	DEF=PEP-protein phosphotransferase system enzyme I fused predicted PTS enzymes: Hpr component
1763971_at	5.26251	black	1039890	c4934	DEF=Hypothetical protein hypothetical protein c4934 1039890
1764920_s_at	5.2374	black	0	IG_2059956_2060281-f	DEF=intergenic region
1767274_s_at	5.23375	black	0	IG_3189956_3190223-f	DEF=intergenic region
1768692_s_at	5.22025	black	0	IG_1395117_1395388-f	DEF=intergenic region
1763528_at	5.21402	black	947739	b3220	DEF=orf, hypothetical protein conserved protein yhcG 947739
1763641_s_at	5.19713	black	0	IG_3358252_3358810-r	DEF=intergenic region
1764121_s_at	5.18794	black	0	IG_3048688_3049134-f	DEF=intergenic region
1759875_s_at	5.1778	black	0	IG_3237188_3237583-f	DEF=intergenic region
1767840_at	5.1667	black	946671	b2164	DEF=putative transport system permease protein predicted nucleoside transporter yeiM 946671 0006810
1764277_s_at	5.16301	black	0	IG_1741267_1741480-f	DEF=intergenic region
1765065_at	5.14327	black	2847764	b1980	DEF=orf, hypothetical protein pseudo yeeL 2847764
1763883_s_at	5.13557	black	947826	b3322	DEF=calcium-binding protein required for initiation of chromosome replication part of gsp divergon involved in type II protein secretion
1761929_s_at	5.07407	black	912607	b2047	DEF=putative colanic acid biosynthsis UDP-glucose lipid carrier transferase putative UDP-glucose lipid carrier transferase
1761593_s_at	5.0699	black	916949	b1736	DEF=PEP-dependent phosphotransferase enzyme III for cellobiose, arbutin, and salicin N,N'-diacetylchitobiose-specific PTS system transporter subunit IIA
1761054_at	5.06339	black	949072	b2879	DEF=putative proteoglycan predicted chlorohydrolase
1759341_s_at	5.06008	black	0	IG_2311197_2311507-f	DEF=intergenic region
1764530_s_at	5.05636	black	944948	b0299	DEF=IS3 putative transposase IS3 element protein InsF insF 944948 945036 945587 946629 947988 0006310
1764299_s_at	5.05616	black	946080	Z2175	DEF=orf, hypothetical protein predicted protein
1763692_s_at	5.05035	black	912297	b1348	DEF=restriction alleviation and modification enhancement restriction alleviation and modification protein
1768105_s_at	5.04811	black	0	IG_1529601_1529839-f	DEF=intergenic region
1767898_s_at	5.04513	black	948207	b3693	DEF=2-oxo-3-deoxygalactonate kinase 2-dehydro-3-deoxygalactonokinase
1764758_at	5.04165	black	947224	b2758	DEF=orf, hypothetical protein predicted protein ygcJ 947224 0005515
1768877_s_at	5.00529	black	914118	b1006	DEF=putative transport protein putative transport protein
1759771_s_at	4.97705	black	0	IG_1669709_1669983-r	DEF=intergenic region
1759388_at	4.94383	black	1040238	c4656	DEF=Hypothetical protein hypothetical protein c4656 1040238
1763807_s_at	4.9414	black	912685	b1115	DEF=orf, hypothetical protein hypothetical protein
1761558_s_at	4.93359	black	946130	Z2568	DEF=integrase fragment, cryptic prophage CP-933P integrase fragment, cryptic prophage CP-933P
1762181_s_at	4.90999	black	0	IG_2922538_2922756-r	DEF=intergenic region
1763032_s_at	4.89598	black	916467	b2857	DEF=orf, hypothetical protein hypothetical protein
1767935_at	4.8909	black	960760	Z5187	DEF=putative replicase hypothetical protein Z5187 960760
1766307_at	4.88771	black	945727	b1159	DEF=restriction of DNA at 5-methylcytosine residues; at locus of e14 element e14 prophage; 5-methylcytosine-specific restriction endonuclease B mcrA 945727 0009307
1761727_at	4.87155	black	947222	b2760	DEF=orf, hypothetical protein predicted protein ygcL 947222
1765488_s_at	4.86006	black	915589	b3596	DEF=orf, hypothetical protein hypothetical protein
1761414_s_at	4.84595	black	914122	b4145	DEF=orf, hypothetical protein hypothetical protein
1765671_at	4.84212	black	945116	b0497	DEF=rhsD protein in rhs element rhsD element protein rhsD 945116
1766898_s_at	4.84147	black	913481	b4399	DEF=catabolite repression sensor kinase for PhoB; alternative sensor for pho regulon sensory histidine kinase CreC
1764656_s_at	4.83664	black	0	IG_2438141_2438404-f	DEF=intergenic region
1760668_s_at	4.83332	black	915063	b3904	DEF=rhamnulokinase rhamnulokinase rhaB 915063 948399 960244 0005975
1763941_s_at	4.80494	black	916999	b0601	DEF=orf, hypothetical protein hypothetical protein
1765245_s_at	4.79994	black	0	IG_584857_585369-f	DEF=intergenic region
1759641_s_at	4.77306	black	946066	b4268	DEF=gluconate kinase D-gluconate kinase
1768433_at	4.76094	black	0	b0554	DEF=orf, hypothetical protein
1769157_s_at	4.72662	black	913884	b2062	DEF=putative polysaccharide export protein hypothetical protein
1768501_s_at	4.7113	black	916985	b0587	DEF=ferric enterobactin (enterochelin) transport ferric enterobactin transport protein FepE
1768726_x_at	4.70897	black	1037864	c2574	DEF=Hypothetical protein hypothetical protein c2574 1037864
1762241_s_at	4.69102	black	0	c4362	DEF=Hypothetical protein
1764699_s_at	4.6737	black	914285	b4075	DEF=part of formate-dependent nitrite reductase complex formate-dependent nitrite reductase complex subunit NrfF
1763303_at	4.63534	black	947213	b2754	DEF=orf, hypothetical protein predicted protein ygbF 947213
1765097_s_at	4.61743	black	915360	b0502	DEF=orf, hypothetical protein hypothetical protein
1768898_s_at	4.61375	black	913955	b4210	DEF=putative transmembrane subunit putative transmembrane subunit
1761260_s_at	4.61356	black	912413	b2468	DEF=putative oxidoreductase Fe-S subunit fused predicted oxidoreductase: FeS binding subunit
1764411_s_at	4.61109	black	916774	b2178	DEF=putative transport system permease protein putative transport system permease protein
1765715_x_at	4.60131	black	2847733	b4419	DEF=small toxic polypeptide toxic polypeptide, small
1762829_s_at	4.59722	black	0	IG_1494656_1494879-f	DEF=intergenic region
1760158_s_at	4.56399	black	0	IG_296321_296604-r	DEF=intergenic region
1767007_s_at	4.56113	black	0	IG_2001630_2001894-r	DEF=intergenic region
1762391_at	4.5586	black	947073	b0263	DEF=putative transport system permease protein pseudo afuB 947073
1761903_s_at	4.55214	black	0	IG_20509_20814-f	DEF=intergenic region
1767497_s_at	4.51454	black	0	IG_892657_893006-f	DEF=intergenic region
1767754_at	4.50867	black	946930	b2445	DEF=orf, hypothetical protein CPZ-55 prophage; predicted protein yffN 946930
1760125_s_at	4.49861	black	945733	b1161	DEF=orf, hypothetical protein hypothetical protein
1767469_s_at	4.49836	black	913690	c2587	DEF=Hypothetical protein hypothetical protein
1764333_at	4.49293	black	945308	b0363	DEF=polysaccharide metabolism predicted glucosyltransferase yaiP 945308
1764132_s_at	4.48248	black	1039219	c3369	DEF=Hypothetical protein hypothetical protein c3369 1039219
1763654_s_at	4.48189	black	912300	b1347	DEF=orf, hypothetical protein hypothetical protein
1764282_s_at	4.47958	black	0	IG_1306670_1307039-r	DEF=intergenic region
1768582_s_at	4.47437	black	916588	b2078	DEF=sensor protein (for BaeR) signal transduction histidine-protein kinase BaeS
1761583_s_at	4.474	black	913937	b0193	DEF=orf, hypothetical protein hypothetical protein
1761862_s_at	4.47352	black	1035643	c1838	DEF=Hypothetical protein hypothetical protein c1838 1035643
1766539_s_at	4.46046	black	0	IG_2989782_2990115-r	DEF=intergenic region
1768848_s_at	4.44561	black	913270	b0548	DEF=similar to phage 82 and lambda proteins prophage protein NinE
1766299_at	4.42127	black	2847674	b4437
1767735_s_at	4.39411	black	0	IG_2087763_2088017-r	DEF=intergenic region
1768654_s_at	4.37297	black	912814	b1774	DEF=putative oxidoreductase putative oxidoreductase
1763191_s_at	4.37182	black	0	IG_2802483_2802835-f	DEF=intergenic region
1761072_at	4.35827	black	947225	b2757	DEF=orf, hypothetical protein predicted protein ygcI 947225
1759596_s_at	4.35735	black	1036605	c2169	DEF=Hypothetical protein hypothetical protein c2169 1036605
1766317_at	4.3497	black	948776	b4253	DEF=orf, hypothetical protein predicted protein yjgL 948776 0005515
1761613_s_at	4.33668	black	916468	b2856	DEF=orf, hypothetical protein hypothetical protein
1766828_s_at	4.33101	black	946298	b0518	DEF=involved in protein transport; multicopy suppressor of dominant negative ftsH mutants membrane protein FdrA
1759410_s_at	4.32494	black	915281	c2980	DEF=Ethanolamine utilization protein eutE EutE
1766644_s_at	4.32306	black	0	IG_3661158_3661519-f	DEF=intergenic region
1769087_s_at	4.30965	black	912294	b1349	DEF=recombinase, DNA renaturation recombination and repair protein RecT
1762052_s_at	4.29621	black	917333	b1526	DEF=putative transcriptional regulator LYSR-type putative transcriptional regulator LYSR-type
1761823_s_at	4.29077	black	914442	b0305	DEF=putative ARAC-type regulatory protein putative ARAC-type regulatory protein
1761539_s_at	4.28847	black	914246	b4103	DEF=orf, hypothetical protein membrane channel protein component of Pn transporter
1766909_s_at	4.28721	black	0	IG_727956_728356-f	DEF=intergenic region
1760508_s_at	4.2837	black	915530	b0505	DEF=hypothetical protein ureidoglycolate hydrolase
1767378_s_at	4.28006	black	912288	b1350	DEF=exonuclease VIII, ds DNA exonuclease, 5 --> 3 specific exonuclease VIII
1767857_s_at	4.26438	black	0	IG_572957_573178-f	DEF=intergenic region
1764549_s_at	4.2326	black	915769	b4156	DEF=putative transport putative transport
1766309_s_at	4.23198	black	0	IG_1500180_1500480-r	DEF=intergenic region
1762897_s_at	4.2201	black	0	IG_3351686_3352266-f	DEF=intergenic region
1769154_at	4.21185	black	0	b1999	DEF=putative histone
1762573_s_at	4.20683	black	915921	Z4734	DEF=kinase (ribokinase family) hypothetical protein
1765599_s_at	4.17223	black	915280	b2456	DEF=detox protein ethanolamine utilization protein eutN
1759086_s_at	4.17196	black	916468	b2855	DEF=putative 2-component transcriptional regulator hypothetical protein
1761561_s_at	4.16083	black	961325	Z3951	DEF=orf; Unknown function hypothetical protein Z3951 961325
1765437_s_at	4.12319	black	0	IG_2982147_2982432-r	DEF=intergenic region
1761431_s_at	4.12307	black	0	IG_1390915_1391229-f	DEF=intergenic region
1768086_at	4.12233	black	946754	b2275	DEF=orf, hypothetical protein predicted protein yfbP 946754 0005488
1768850_s_at	4.09903	black	0	IG_2135266_2135857-r	DEF=intergenic region
1765387_s_at	4.09163	black	0	IG_281208_281480-r	DEF=intergenic region
1763123_s_at	4.07525	black	1040295	IG_3331093_3331350-f	DEF=intergenic region hypothetical protein c3944 1040295
1763501_s_at	4.07038	black	0	IG_3013760_3014080-f	DEF=intergenic region
1768092_s_at	4.06202	black	916595	b2087	DEF=split galactitol utilization operon repressor, interrupted hypothetical protein
1768849_s_at	4.05761	black	917299	b1496	DEF=putative ATP-binding component of a transport system putative ATP-binding component of a transport system
1765800_s_at	4.04433	black	0	IG_2561138_2561596-f	DEF=intergenic region
1760655_s_at	4.04001	black	916480	b2849	DEF=orf, hypothetical protein hypothetical protein
1761970_s_at	4.03907	black	914249	b4102	DEF=putative transcriptional regulator putative transcriptional regulator
1767299_s_at	4.03776	black	916491	b2831	DEF=methyl-directed mismatch repair DNA mismatch repair protein
1759348_s_at	4.01972	black	0	IG_294024_294362-r	DEF=intergenic region
1759778_s_at	4.01832	black	0	IG_847228_847630-f	DEF=intergenic region
1765320_at	4.01237	black	1037391	c5328	DEF=Hypothetical ABC transporter permease protein yjfF inner membrane ABC transporter permease protein YjfF yjfF 1037391 0006810
1763305_s_at	4.00291	black	912826	b1010	DEF=hypothetical protein hypothetical protein
1762485_s_at	3.98185	black	0	IG_2986191_2986523-r	DEF=intergenic region
1765218_s_at	3.97104	black	914472	ECs0371	DEF=hypothetical protein hypothetical protein ECs0371 914472
1759334_s_at	3.96994	black	913632	b4334	DEF=putative enzyme hypothetical protein
1766800_s_at	3.96098	black	0	IG_2889922_2890236-r	DEF=intergenic region
1764096_s_at	3.96031	black	959995	Z5731	DEF=orf; Unknown function hypothetical protein
1764207_s_at	3.95494	black	915277	b2458	DEF=ethanolamine utilization; homolog of Salmonella acetylbutyryl P transferase phosphotransacetylase
1761478_s_at	3.95245	black	0	IG_1608705_1608930-r	DEF=intergenic region
1761256_at	3.91966	black	944959	b0279	DEF=orf, hypothetical protein CP4-6 prophage; predicted protein yagM 944959
1767491_s_at	3.9095	black	916465	b2859	DEF=orf, hypothetical protein hypothetical protein
1767297_s_at	3.8826	black	0	IG_1717627_1717899-r	DEF=intergenic region
1764898_s_at	3.8799	black	914655	b2768	DEF=putative anti-terminator regulatory protein putative anti-terminator regulatory protein
1761904_s_at	3.86414	black	914253	b4100	DEF=phosphonate metabolism carbon-phosphorus lyase complex subunit phnH 1038039 914253 948619 960023 0015716
1761456_s_at	3.85614	black	0	IG_1762411_1762736-r	DEF=intergenic region
1763554_s_at	3.8487	black	915284	b2454	DEF=ethanolamine utilization; homolog of Salmonella gene EutJ
1768683_s_at	3.84414	black	0	IG_2815526_2815805-f	DEF=intergenic region
1768512_s_at	3.83453	black	913482	b1959	DEF=putative transmembrane subunit hypothetical protein
1761995_s_at	3.81922	black	0	IG_1521090_1521330-f	DEF=intergenic region
1767462_at	3.819	black	949088	b4347	DEF=orf, hypothetical protein conserved protein symE 949088
1767638_s_at	3.79122	black	0	IG_353817_354145-f	DEF=intergenic region
1766451_at	3.77343	black	946976	b1345	DEF=putative transposase Rac prophage; integrase intR 946976 0006310
1765792_s_at	3.75895	black	912562	b2052	DEF=putative nucleotide di-P-sugar epimerase or dehydratase GDP-fucose synthetase chain A
1762106_s_at	3.73734	black	917606	b0788	DEF=orf, hypothetical protein hypothetical protein
1765922_s_at	3.72902	black	1038305	c2785	DEF=Hypothetical protein hypothetical protein c2785 1038305
1769249_x_at	3.71678	black	960466	Z1987	DEF=orf; Unknown function hypothetical protein Z1987 960466
1766930_s_at	3.6947	black	914217	b1460	DEF=H repeat-associated protein (ORF-H) H repeat-containing protein
1764930_s_at	3.682	black	916371	b2931	DEF=putative oxidoreductase putative oxidoreductase
1759513_s_at	3.67405	black	0	IG_3056431_3056685-f	DEF=intergenic region
1764584_s_at	3.66798	black	0	IG_2595639_2595850-f	DEF=intergenic region
1763210_at	3.66493	black	946862	b2405	DEF=regulator for xapA DNA-binding transcriptional activator xapR 946862 0006350
1767015_at	3.65897	black	947563	b2641	DEF=orf, hypothetical protein pseudo yfjV 947563
1768470_s_at	3.65834	black	0	IG_2989023_2989289-r	DEF=intergenic region
1768788_s_at	3.64254	black	912351	b2059	DEF=putative regulator glycosyl transferase
1768072_at	3.62282	black	2847703	b1170	DEF=putative part of putative ATP-binding component of a transport system pseudo ycgH 2847703
1765169_s_at	3.61231	black	913769	b2461	DEF=orf, hypothetical protein ethanolamine utilization protein eutP
1761401_s_at	3.57901	black	914438	b0301	DEF=orf, hypothetical protein hypothetical protein
1762347_s_at	3.57646	black	914252	b4101	DEF=phosphonate metabolism PhnG
1769003_at	3.56481	black	947223	b2759	DEF=orf, hypothetical protein predicted protein ygcK 947223
1759773_s_at	3.54986	black	0	IG_573563_573959-f	DEF=intergenic region
1767249_s_at	3.54235	black	0	IG_2786671_2786900-r	DEF=intergenic region
1759992_s_at	3.53646	black	945815	Z2221	DEF=conserved protein cAMP phosphodiesterase, heme-regulated
1762402_s_at	3.53642	black	915189	b3808	DEF=orf, hypothetical protein hypothetical protein
1764845_s_at	3.52714	black	912306	Z5695	DEF=phosphonate metabolism carbon-phosphorus lyase complex accessory protein phnP 1038195 912306 948600 960031 0015716
1761123_s_at	3.51199	black	948596	b4084	DEF=putative NAGC-like transcriptional regulator D-allose kinase
1760525_at	3.48884	black	2847707	b3419	DEF=RNA phosphage cyclase RNA 3'-terminal phosphate cyclase rtcA 2847707 0006396
1763078_at	3.48554	black	948213	b3662	DEF=putative transport protein predicted transporter nepI 948213
1760235_s_at	3.48517	black	946683	b2179	DEF=putative transport system permease protein ABC transporter permease
1763148_s_at	3.47321	black	916659	b0520	DEF=putative carboxylase putative carboxylase
1759700_s_at	3.47148	black	914228	ECs0243	DEF=hypothetical protein hypothetical protein
1764494_at	3.46815	black	947481	b0107	DEF=putative integral membrane protein involved in biogenesis of fimbriae, protein transport, DNA uptake conserved protein with nucleoside triphosphate hydrolase domain hofB 947481 0006810
1759993_s_at	3.42991	black	913694	b2051	DEF=GDP-mannose mannosyl hydrolase GDP-mannose mannosyl hydrolase
1765415_s_at	3.42858	black	1036197	c0471	DEF=Hypothetical protein hypothetical protein c0471 1036197
1759276_s_at	3.40901	black	916466	b2858	DEF=orf, hypothetical protein hypothetical protein
1766929_s_at	3.40572	black	0	IG_1271073_1271341-f	DEF=intergenic region
1762046_s_at	3.39365	black	0	IG_1644762_1645197-r	DEF=intergenic region
1763835_s_at	3.37794	black	0	IG_3576358_3576580-f	DEF=intergenic region
1768521_s_at	3.37676	black	914326	Z5625	DEF=orf, hypothetical protein hypothetical protein
1762877_s_at	3.3738	black	916853	b2257	DEF=4-amino-4-deoxy-L-arabinose transferase (lipid A modification) 4-amino-4-deoxy-L-arabinose transferase arnT 1038324 916853 947297 957170 0006493
1761801_s_at	3.37083	black	917103	c0788	DEF=Hypothetical transporter ybgH putative transport protein
1766922_s_at	3.35842	black	912770	b2054	DEF=putative transferase putative colanic acid biosynthesis acetyltransferase WcaF
1762384_at	3.35334	black	949094	b0276	DEF=orf, hypothetical protein CP4-6 prophage; predicted protein yagJ 949094
1760465_s_at	3.353	black	0	IG_2226860_2227457-r	DEF=intergenic region
1762084_s_at	3.34633	black	916474	b2801	DEF=fucose permease L-fucose transporter
1763157_s_at	3.32411	black	914908	b2056	DEF=putative colanic acid polymerase putative colanic acid biosynthesis protein
1761321_at	3.30419	black	944984	b0323	DEF=putative kinase (EC 2.7.2.2). predicted carbamate kinase-like protein yahI 944984 0006525
1762390_s_at	3.2946	black	915292	b2451	DEF=orf, hypothetical protein reactivating factor for ethanolamine ammonia lyase
1763999_s_at	3.28199	black	912422	b2057	DEF=putative glycosyl transferase glycosyl transferase
1762020_at	3.28028	black	945371	b0730	DEF=transcriptional regulator of succinylCoA synthetase operon DNA-binding transcriptional dual regulator, fatty-acyl-binding mngR 945371 0006350
1762225_s_at	3.23635	black	912887	b1007	DEF=hypothetical protein putative flavin:NADH reductase ycdH
1763939_s_at	3.23281	black	912509	b1009	DEF=putative acetyltransferase putative acetyltransferase
1768967_s_at	3.22687	black	917314	b1503	DEF=putative fimbrial-like protein putative fimbrial-like protein
1760925_s_at	3.22199	black	914913	b2558	DEF=putative periplasmic binding transport protein putative transglycosylase
1762436_s_at	3.21971	black	914471	b0321	DEF=orf, hypothetical protein hypothetical protein
1760198_s_at	3.21499	black	916206	b3074	DEF=putative tRNA synthetase hypothetical protein
1766221_s_at	3.21228	black	0	IG_167265_167483-f	DEF=intergenic region
1763117_s_at	3.18946	black	0	IG_2510727_2511061-r	DEF=intergenic region
1763366_x_at	3.18539	black	912759	b2003	DEF=orf, hypothetical protein hypothetical protein
1769111_s_at	3.17978	black	0	IG_2054538_2054879-r	DEF=intergenic region
1769099_s_at	3.17234	black	915290	c2977	DEF=Ethanolamine utilization protein eutH EutH
1763656_s_at	3.15879	black	0	IG_698401_698796-r	DEF=intergenic region
1760830_s_at	3.14739	black	0	IG_784541_784855-f	DEF=intergenic region
1763203_s_at	3.14027	black	0	IG_784541_784855-r	DEF=intergenic region
1765502_s_at	3.09276	black	915567	Z3673	DEF=putative transcriptional regulator LYSR-type hypothetical protein
1760632_s_at	3.09049	black	1040307	IG_3334460_3334603-f	DEF=intergenic region hypothetical protein c3949 1040307
1762533_s_at	3.0769	black	914257	b4094	DEF=ATP-binding component of phosphonate transport ribose 1,5-bisphosphokinase
1759224_s_at	3.06777	black	912985	b2055	DEF=putative colanic acid biosynthesis glycosyl transferase glycosyl transferase
1766544_s_at	3.06036	black	914614	b0457	DEF=orf, hypothetical protein hypothetical protein
1765093_s_at	3.04475	black	0	IG_3010415_3010634-f	DEF=intergenic region
1763523_s_at	3.03588	black	913207	b1173	DEF=orf, hypothetical protein hypothetical protein
1768785_s_at	3.03465	black	917116	ECs3324	DEF=hypothetical protein ethanolamine utilization protein eutS
1767281_s_at	3.03304	black	914217	Z2253	DEF=H repeat-associated protein of Rhs element H repeat-containing protein
1764748_s_at	3.00802	black	0	IG_1314117_1314439-f	DEF=intergenic region
1764042_s_at	3.00759	black	917660	ECs1939	DEF=hypothetical protein hypothetical protein
1761978_at	2.98705	black	947735	b3219	DEF=putative transcriptional regulator predicted transcriptional regulator yhcF 947735
1766333_s_at	2.98506	black	914256	b4098	DEF=phosphonate metabolism PhnJ
1766044_s_at	2.98049	black	0	IG_248135_248357-f	DEF=intergenic region
1759709_s_at	2.97741	black	913677	b2050	DEF=putative colanic biosynthesis glycosyl transferase glycosyl transferase
1767842_s_at	2.93393	black	0	IG_2993115_2993335-r	DEF=intergenic region
1759240_s_at	2.93281	black	915275	b2460	DEF=orf, hypothetical protein ethanolamine utilization protein EutQ
1760792_s_at	2.91936	black	2693831	ECs5487	DEF=hypothetical protein hypothetical protein ECs5487 2693831
1764944_s_at	2.91469	black	914468	b0318	DEF=putative transcription factor putative transcription factor
1761367_s_at	2.90537	black	948594	b4086	DEF=putative transport system permease protein D-allose transporter subunit
1766885_s_at	2.90486	black	1035037	c1337	DEF=Hypothetical protein hypothetical protein c1337 1035037
1765687_at	2.90423	black	947226	b2756	DEF=orf, hypothetical protein predicted protein ygcH 947226
1767371_s_at	2.90308	black	913884	c2589	DEF=Putative conserved protein hypothetical protein
1768054_s_at	2.8618	black	0	IG_271480_272085-r	DEF=intergenic region
1769054_s_at	2.85215	black	912474	b1065	DEF=orf, hypothetical protein multidrug resistance protein MdtH
1768539_s_at	2.84801	black	0	IG_3332323_3332549-f	DEF=intergenic region
1764358_s_at	2.84417	black	0	IG_3107234_3107569-f	DEF=intergenic region
1766507_s_at	2.82027	black	0	IG_3537345_3537798-f	DEF=intergenic region
1761980_s_at	2.81884	black	0	IG_3494515_3494891-r	DEF=intergenic region
1760156_s_at	2.80774	black	946149	Z2621	DEF=partial beta-D-glucuronidase beta-D-glucuronidase uidA 1036059 946149 959631 0005975
1762097_s_at	2.79157	black	915617	b3563	DEF=orf, hypothetical protein hypothetical protein
1763481_s_at	2.78936	black	916438	b2862	DEF=orf, hypothetical protein hypothetical protein
1761603_s_at	2.76614	black	913710	b1776	DEF=putative oxidoreductase putative oxidoreductase
1767051_s_at	2.7508	black	916417	b2883	DEF=hypothetical protein guanine deaminase
1762565_s_at	2.74039	black	0	IG_3717398_3717677-r	DEF=intergenic region
1764536_at	2.73438	black	946967	b0364	DEF=orf, hypothetical protein conserved protein yaiS 946967
1760441_s_at	2.73092	black	0	IG_986206_986807-r	DEF=intergenic region
1761413_s_at	2.72513	black	912379	c2255	DEF=Hypothetical protein hypothetical protein
1767300_at	2.71547	black	0	c4992	DEF=Hypothetical protein
1769139_s_at	2.70392	black	915354	b0499	DEF=orf, hypothetical protein RhsD
1767718_s_at	2.69653	black	0	IG_1675928_1676450-r	DEF=intergenic region
1764363_s_at	2.69416	black	913980	b1868	DEF=orf, hypothetical protein hypothetical protein
1764438_s_at	2.68768	black	913724	b1900	DEF=ATP-binding component of high-affinity L-arabinose transport system L-arabinose transporter ATP-binding protein
1759437_s_at	2.67892	black	916958	b0568	DEF=bacteriophage N4 receptor, outer membrane protein bacteriophage N4 receptor, outer membrane subunit
1762976_s_at	2.67883	black	915112	b3862	DEF=putative endonuclease putative endonuclease
1765606_at	2.67577	black	945265	b1396	DEF=hypothetical protein predicted thioesterase paaI 945265
1760522_at	2.67018	black	948579	b4074	DEF=formate-dependent nitrite reductase; possible assembly function heme lyase (NrfEFG) for insertion of heme into c552, subunit NrfE nrfE 948579 0006461
1765366_s_at	2.66612	black	915288	b2453	DEF=ethanolamine utilization; homolog of Salmonella enzyme, similar to iron-containing alcohol dehydrogenase hypothetical protein
1767419_s_at	2.66468	black	914927	b2539	DEF=small terminal subunit of phenylpropionate dioxygenase 3-phenylpropionate dioxygenase subunit beta
1767774_at	2.65133	black	944947	b0270	DEF=putative permease CP4-6 prophage; predicted sugar transporter yagG 944947 0006810
1759888_at	2.64521	black	2847763	b1966	DEF=putative outer membrane protein pseudo yedS 2847763
1761992_at	2.63123	black	946928	b2447	DEF=orf, hypothetical protein CPZ-55 prophage; predicted protein yffP 946928
1765934_s_at	2.62212	black	912555	b2049	DEF=mannose-1-phosphate guanyltransferase mannose-1-phosphate guanylyltransferase
1767364_at	2.60642	black	945703	b1152	DEF=hypothetical protein pseudo ymfP 945703
1760436_s_at	2.59958	black	0	IG_266192_266407-f	DEF=intergenic region
1764084_at	2.59907	black	946606	b2075	DEF=orf, hypothetical protein multidrug efflux system, subunit B mdtB 946606 0006810
1764442_at	2.59573	black	945962	b1392	DEF=putative oxidoreductase predicted multicomponent oxygenase
1762464_at	2.59324	black	0	b0538	DEF=putative sensory transduction regulator
1767163_s_at	2.58924	black	914447	b0309	DEF=orf, hypothetical protein hypothetical protein
1761774_s_at	2.57967	black	0	IG_1293368_1293648-f	DEF=intergenic region
1761348_at	2.57395	black	946011	b1393	DEF=hypothetical protein enoyl-CoA hydratase-isomerase paaF 946011 0006629
1763002_s_at	2.55443	black	912544	b0964	DEF=orf, hypothetical protein hypothetical protein
1760995_s_at	2.55079	black	913468	b0062	DEF=L-arabinose isomerase L-arabinose isomerase
1760236_s_at	2.54835	black	913465	b0061	DEF=L-ribulose-5-phosphate 4-epimerase L-ribulose-5-phosphate 4-epimerase araD 1035252 913465 945294 956737 0005975
1759894_s_at	2.54146	black	914493	b0338	DEF=cyn operon positive regulator DNA-binding transcriptional regulator CynR
1760459_s_at	2.5324	black	0	IG_924764_925106-f	DEF=intergenic region
1761659_s_at	2.52556	black	913471	b0063	DEF=L-ribulokinase ribulokinase
1762923_s_at	2.51178	black	916608	b2102	DEF=orf, hypothetical protein hypothetical protein
1763699_s_at	2.51143	black	912331	b1339	DEF=putative transcriptional regulator LYSR-type predicted DNA-binding transcriptional regulator
1767089_s_at	2.50047	black	0	IG_66551_66834-r	DEF=intergenic region
1768150_s_at	2.4928	black	947197	b2738	DEF=putative epimerasealdolase putative aldolase
1764157_at	2.4758	black	946569	b2045	DEF=putative galactokinase (EC 2.7.1.6). predicted pyruvyl transferase wcaK 946569 0009103
1767601_s_at	2.45755	black	0	IG_889043_889311-r	DEF=intergenic region
1765856_s_at	2.45633	black	0	IG_3606628_3606847-f	DEF=intergenic region
1760194_s_at	2.45051	black	946581	b2046	DEF=probable export protein colanic acid exporter wzxC 1037856 946581 0000271
1764668_s_at	2.44768	black	913398	b0007	DEF=inner membrane transport protein putative inner membrane transport protein
1759635_s_at	2.4405	black	0	IG_2021701_2021989-f	DEF=intergenic region
1764955_s_at	2.43898	black	0	IG_2116427_2116701-r	DEF=intergenic region
1760778_s_at	2.43616	black	915411	b3680	DEF=putative ARAC-type regulatory protein putative ARAC-type regulatory protein
1767039_at	2.43397	black	2847669	b4343	DEF=orf, hypothetical protein pseudo yjiV 2847669
1768254_at	2.4242	black	945426	b0798	DEF=orf, hypothetical protein conserved protein ybiA 945426 0005515
1759685_s_at	2.4083	black	912678	b1901	DEF=L-arabinose-binding periplasmic protein L-arabinose-binding periplasmic protein precursor
1760840_s_at	2.40224	black	913723	c0159	DEF=Hypothetical protein yadE precursor hypothetical protein
1760776_s_at	2.40116	black	912803	b1008	DEF=hypothetical protein hypothetical protein
1761075_s_at	2.3969	black	0	IG_980010_980269-r	DEF=intergenic region
1766536_at	2.38922	black	945959	b1391	DEF=hypothetical protein predicted multicomponent oxygenase
1761939_s_at	2.38561	black	948593	b4087	DEF=putative ATP-binding component of a transport system fused D-allose transporter subunits of ABC superfamily: ATP-binding components
1760246_s_at	2.3839	black	915722	b3532	DEF=orf, hypothetical protein regulator of cellulose synthase, cyclic di-GMP binding
1760799_s_at	2.37788	black	915726	b3533	DEF=putative cellulose synthase cellulose synthase catalytic subunit
1762443_s_at	2.3689	black	0	IG_77300_77620-r	DEF=intergenic region
1760127_at	2.35892	black	947467	b2972	DEF=putative peptidase bifunctional prepilin leader peptidase
1768246_s_at	2.35356	black	0	IG_899799_900088-r	DEF=intergenic region
1761255_s_at	2.3326	black	914245	b4105	DEF=periplasmic binding protein component of Pn transporter periplasmic binding protein component of Pn transporter
1764122_s_at	2.32936	black	959386	b1052	DEF=orf, hypothetical protein hypothetical protein Z1687 959386
1762318_s_at	2.32741	black	0	Z0379	DEF=orf, hypothetical protein
1767960_s_at	2.32199	black	1037228	c4338	DEF=Hypothetical protein 2-dehydro-3-deoxygluconokinase kdgK 1037228 0008673
1764398_s_at	2.30441	black	1035251	c1515	DEF=Hypothetical protein hypothetical protein c1515 1035251
1768216_s_at	2.30104	black	0	IG_3054986_3055197-r	DEF=intergenic region
1764155_s_at	2.2986	black	913196	b1182	DEF=hemolysin E hemolysin E hlyE 913196 945745 959895 0009405
1760261_s_at	2.29374	black	917235	b1434	DEF=orf, hypothetical protein hypothetical protein
1762346_s_at	2.29144	black	0	IG_1544053_1544311-f	DEF=intergenic region
1762725_s_at	2.26997	black	0	IG_1814153_1814409-f	DEF=intergenic region
1766508_at	2.26712	black	945845	b0278	DEF=DNA-binding protein CP4-6 prophage; DNA-binding protein yagL 945845 0006310
1768564_s_at	2.24534	black	914412	b0283	DEF=orf, hypothetical protein hypothetical protein
1769291_at	2.23734	black	947583	b3076	DEF=evolved beta-D-galactosidase, alpha subunit; cryptic gene cryptic beta-D-galactosidase, alpha subunit ebgA 947583 0005975
1764886_s_at	2.23344	black	913259	ECs1624	DEF=lipoprotein Rz1 precursor putative Rz endopeptidase from lambdoid prophage DLP12
1768149_s_at	2.23143	black	913968	b1012	DEF=hypothetical protein putative monooxygenase ycdM
1768453_s_at	2.23015	black	914246	b4104	DEF=membrane channel protein component of Pn transporter membrane channel protein component of Pn transporter
1767789_at	2.22921	black	945956	b1390	DEF=hypothetical protein predicted multicomponent oxygenase
1763136_at	2.21991	black	946929	b2446	DEF=orf, hypothetical protein CPZ-55 prophage; predicted protein yffO 946929 0005634
1764065_s_at	2.21593	black	1038670	c3010	DEF=Hypothetical protein hypothetical protein c3010 1038670
1766271_s_at	2.2142	black	912808	b1645	DEF=orf, hypothetical protein hypothetical protein
1761761_s_at	2.20844	black	0	IG_3636772_3637014-f	DEF=intergenic region
1768750_s_at	2.20812	black	917741	b0916	DEF=orf, hypothetical protein hypothetical protein
1769219_at	2.18275	black	2847763	b1965	DEF=hypothetical protein pseudo yedS 2847763
1762585_at	2.18251	black	948858	b4331	DEF=hypothetical protein 2'-phosphotransferase kptA 948858 0006388
1762900_s_at	2.16818	black	913927	b1964	DEF=putative outer membrane protein putative outer membrane protein
1765731_s_at	2.14907	black	0	IG_1344767_1345001-r	DEF=intergenic region
1761713_s_at	2.13507	black	913961	b2053	DEF=GDP-D-mannose dehydratase GDP-D-mannose dehydratase
1763459_s_at	2.13396	black	2693793	ECs5460	DEF=hypothetical protein hypothetical protein ECs5460 2693793
1762372_s_at	2.12769	black	915312	b3819	DEF=orf, hypothetical protein hypothetical protein
1764666_at	2.12673	black	948825	b4298	DEF=putative lyasesynthase KpLE2 phage-like element; predicted lyase
1763923_at	2.11915	black	945954	b1387	DEF=putative aldehyde dehydrogenase fused aldehyde dehydrogenase
1760105_s_at	2.11101	black	1038405	c2854	DEF=Hypothetical protein hypothetical protein c2854 1038405
1762303_s_at	2.10963	black	912644	b2058	DEF=putative transferase putative colanic acid biosynthesis acetyltransferase WcaB
1765128_s_at	2.08771	black	0	IG_2428784_2429041-f	DEF=intergenic region
1763119_s_at	2.07656	black	913526	b4363	DEF=orf, hypothetical protein hypothetical protein
1766688_s_at	2.07441	black	1036226	c2063	DEF=Hypothetical protein hypothetical protein c2063 1036226
1767999_s_at	2.06673	black	948592	c5072	DEF=Formate-dependent nitrite reductase complex nrfG subunit formate-dependent nitrite reductase complex subunit NrfG
1766917_s_at	2.06324	black	949011	b2219	DEF=sensor protein AtoS for response regulator AtoC sensory histidine kinase AtoS
1767252_s_at	2.05797	black	916088	b3188	DEF=regulatory factor of maltose metabolism; similar to Ner repressor protein of phage Mu DNA-binding transcriptional regulator Nlp
1768099_s_at	2.05689	black	0	IG_3198607_3198847-r	DEF=intergenic region
1766884_s_at	2.04814	black	1037439	c4371	DEF=Hypothetical protein hypothetical protein c4371 1037439
1767203_s_at	2.04392	black	0	IG_2009102_2009369-f	DEF=intergenic region
1766626_s_at	2.02092	black	916600	b0519	DEF=orf, hypothetical protein hypothetical protein
1762876_s_at	2.01687	black	0	IG_2590755_2591091-r	DEF=intergenic region
1766841_s_at	2.01434	black	948623	b4106	DEF=ATP-binding component of phosphonate transport phosphonate
1760927_at	2.00904	black	944937	b0267	DEF=orf, hypothetical protein CP4-6 prophage; predicted DNA-binding transcriptional regulator yagA 944937 0015074
1767847_s_at	2.00766	black	0	IG_3331093_3331350-r	DEF=intergenic region
1768407_s_at	2.00039	black	1040064	c4110	DEF=Hypothetical protein hypothetical protein c4110 1040064
1765480_s_at	1.99628	black	916762	b2166	DEF=putative kinase hypothetical protein
[truncated: 8,114 more rows]

## Sheet: Table S5
Comparison with 7 communities with GO annotations identified in the Trevino study at fmin=4
7 communities identified in the Trevino study at fmin=4						Functional overlap with our module
Community P value	GO term num	Community size	GO size	In common with our study module genes	Module function description
8.41e-42	9288	72	24	24	bacterial-type flagellum	Darkred
9.57e-39	6826	53	37	25	iron ion transport	Grey60
8.22e-38	1539	72	28	24	ciliary or flagellar motility	Darkred
3.67e-35	6412	826	101	79	translation	Green
6.51e-34	3735	826	56	54	structural constituent of ribosome	Green
3.08e-31	3723	826	105	77	RNA binding	Green
1.73e-29	6935	72	22	19	chemotaxis	Darkred
4.3e-29	3774	72	17	17	motor activity	Darkred
5.38e-29	9425	72	17	17	bacterial-type flagellum basal body	Darkred
2.06e-25	19861	72	15	15	flagellum	Darkred
5.61e-25	5506	53	210	31	iron ion binding	Grey60
3.72e-24	19843	826	42	40	rRNA binding	Green
6.98e-23	6811	53	79	22	ion transport	Grey60
6.99e-22	30529	826	36	35	ribonucleoprotein complex	Green
1.72e-21	5840	826	38	36	ribosome	Green
6.62e-21	8652	247	62	32	cellular amino acid biosynthetic process	Magenta
4.11e-17	5506	139	210	39	iron ion binding	Darkolivegreen
6.66e-16	9055	139	116	29	electron carrier activity	Darkolivegreen
7.3e-15	51539	139	98	26	4 iron, 4 sulfur cluster binding	Darkolivegreen
8.22e-15	15453	300	15	15	oxidoreduction-driven active transmembrane transporter activity light_xFFFE_driven active transmembrane transporter activity	Brown4
1.85e-13	6865	247	70	27	amino acid transport	Magenta
6.13e-13	45272	300	13	13	plasma membrane respiratory chain complex I	Cyan
9.19e-13	30964	300	13	13	NADH dehydrogenase complex	Cyan
1.97e-12	9060	300	21	16	aerobic respiration	Plum1
2.15e-12	5515	826	875	251	protein binding calmodulin binding	Green

## Sheet: Table S6
Comparison ribosome modular genes identified by the Trevino study and our study
Structural constituent of ribosome from the Trevino study	Present in green module in our study
rpla	Y
rplb	Y
rplc	Y
rpld	Y
rple	Y
rplf	Y
rpli	Y
rplj	Y
rplk	Y
rpll	Y
rplm	Y
rpln	Y
rplo	Y
rplp	Y
rplq	Y
rplr	Y
rpls	Y
rplu	Y
rplv	Y
rplw	Y
rplx	Y
rply	Y
rpma	Y
rpmb	Y
rpmc	Y
rpmd	Y
rpme	Y
rpmg	Y
rpmh	Y
rpmj	Y
rpsa
rpsb	Y
rpsc	Y
rpsd	Y
rpse	Y
rpsf	Y
rpsg	Y
rpsh	Y
rpsi	Y
rpsj	Y
rpsk	Y
rpsl	Y
rpsm	Y
rpsn	Y
rpso	Y
rpsp	Y
rpsq	Y
rpsr	Y
rpss	Y
rpst	Y
rpsu	Y
cdsa	Y
cmk	Y
dnag	Y
dusb	Y
efp
fis	Y
fusa	Y
gidb
gmk	Y
infb	Y
ispu
lpxb
mnmg
mrda
mura
nusa
nusg
obge
pare	Y
ppa	Y
prfc	Y
prib
pyrh
quea
rbfa
rho	Y
rimm	Y
rlmn
rnhb
rnpa	Y
rpoa	Y
rpoz	Y
sece
secg	Y
secy	Y
spea	Y
speb
tff	Y
tig
trma
trmd	Y
trml
trub	Y
truc
tsf	Y
typa	Y
yadb
yggn	Y
ygiq
yhbc
yhbe
yhby	Y
yidc	Y
yidd
yqcc

## Sheet: Table S7
Overlap of flagellum modular genes identified by the Trevino study and our study
The community with most significant GO terms at fmin=4 contains 72 genes	Flagellar genes identified in Darkred module in our study
b1881	Y
b1073	Y
b1074	Y
b1076	Y
b1077	Y
b1078	Y
b1079	Y
b1080	Y
b1081	Y
b1082	Y
b1083	Y
b1923	Y
b1924	Y
b1937	Y
b1938	Y
b1939	Y
b1940
b1942	Y
b1945	Y
b1946	Y
b1947	Y
b1949	Y
b1950
b1925	Y
b3072	Y
b1888	Y
b1883	Y
b1884	Y
b1887	Y
b1882	Y
b1072	Y
b1075	Y
b1071	Y
b1070	Y
b1879	Y
b1880	Y
b1891	Y
b1892	Y
b1878	Y
b1922	Y
b1941	Y
b1943	Y
b1944	Y
b1948	Y
b1926	Y
b1921	Y
b1566	Y
b1936
b763
b764
b765
b1890	Y
b1889	Y
b3025
b1951
b1885	Y
b1886	Y
b1421
b4355	Y
b3666
b1742
b848
b1194	Y
b1904	Y
b4495
b2377
b3525	Y
b4110	Y
b4109
b250
b1044	Y
b1760	Y

## Sheet: Table S8
11 genes with unknown function in Darkred module were submitted to EcoliNet for function prediction
Probes	IntramoduleConnectivity	Module	EntrezID	ORF	Annotation	EcoliNet inferred functions from network neighbors
1765812_s_at	0.0974347	darkred	913714	b1930	DEF=orf, hypothetical protein hypothetical protein	integral to membrane; electron carrier activity
1765955_at	0.188625	darkred	946846	b0250	DEF=orf, hypothetical protein CP4-6 prophage; predicted protein ykfB 946846	bacterial-type flagellar cell motility
1767519_s_at	1.24997	darkred	917112	Z2774	DEF=orf, hypothetical protein hypothetical protein
1767542_s_at	1.25	darkred	916934	b1760	DEF=orf, hypothetical protein hypothetical protein	bacterial-type flagellar cell motility
1764274_s_at	1.26987	darkred	912307	b1044	DEF=orf, hypothetical protein hypothetical protein	bacterial-type flagellar cell motility
1761538_at	2.10488	darkred	947392	b1566	DEF=orf, hypothetical protein Qin prophage; predicted protein flxA 947392	chemotaxis; bacterial-type flagellar cell motility
1767019_s_at	2.28613	darkred	913636	b1904	DEF=orf, hypothetical protein hypothetical protein	bacterial-type flagellum assembly
1761277_s_at	2.64109	darkred	947609	b1194	DEF=orf, hypothetical protein hypothetical protein	chemotaxis; phosphorelay signal transduction system; bacterial-type flagellum assembly
1763969_s_at	3.52972	darkred	914240	b4110	DEF=orf, hypothetical protein hypothetical protein	bacterial-type flagellar cell motility
1765046_s_at	4.50874	darkred	915731	b3525	DEF=orf, hypothetical protein EAL domain-containing protein	chemotaxis; bacterial-type flagellar cell motility
1760453_s_at	8.93533	darkred	913820	b1921	DEF=orf, hypothetical protein protein FliZ	bacterial-type flagellar cell motility
